# Supplementary material for: The low-temperature selective oxidation of alcohols and a one-pot oxidative esterification using an IBS(iii/v)/oxone catalysis
Source: Royal Society of Chemistry journal article supplement (doi:10.1039/d5gc01737h), 2025-01-01

## **Supporting Information**

### **The Low-Temperature Selective Oxidation of Alcohols and a One-Pot Oxidative Esterification Using an IBS(III/V)/Oxone Catalysis**

**Ryutaro Kondo, Muhammet Uyanik,\* and Kazuaki Ishihara\***

Graduate School of Engineering, Nagoya University, Furo-cho, Chikusa, Nagoya 464-8603, Japan

E-mail: muha@chembio.nagoya-u.ac.jp, ishihara@cc.nagoya-u.ac.jp

## Table of Contents:

|                                                                                 |     |
|---------------------------------------------------------------------------------|-----|
| Material and Methods.....                                                       | S2  |
| Additional Information.....                                                     | S3  |
| Scheme S1. Comparison of IBS(III) Species <b>2a–2c</b> in Method C.....         | S3  |
| Scheme S2. Effect of “Buffered” Oxone on the Oxidation Reaction.....            | S3  |
| Table S1. Optimization of Reaction Conditions for Oxidative Esterification..... | S4  |
| EcoScale Calculation.....                                                       | S4  |
| Catalysts and Substrates.....                                                   | S7  |
| Representative Procedures for Oxidation of Primary Alcohols to Aldehydes.....   | S8  |
| Representative Procedures for Oxidation of Secondary Alcohols to Ketones.....   | S13 |
| Procedures for Oxidative Lactonization.....                                     | S17 |
| Representative Procedure for Oxidative Esterification (Method C).....           | S18 |
| References.....                                                                 | S23 |
| NMR Spectra.....                                                                | S24 |

## Materials and Methods

Infrared (IR) spectra were recorded on a JASCO FT/IR 460 plus spectrometer.  $^1\text{H}$  NMR spectra were measured on a JEOL ECS-400 (400 MHz) spectrometer at ambient temperature. Chemical shifts are reported in ppm from the solvent resonance ( $\text{CD}_3\text{CN}$ : 1.94 ppm) or  $\text{Me}_4\text{Si}$  resonance (0.00 ppm;  $\text{CDCl}_3$ ) as internal standard. Data were recorded as follows: the chemical shift in ppm from internal tetramethylsilane on the  $\delta$  scale, multiplicity (s = singlet; d = doublet; t = triplet; q = quartet; quin = quintet; sept = septet; m = multiplet; brs = broad singlet), coupling constant (Hz), and integration.  $^{13}\text{C}$  NMR spectra were measured on a JEOL ECS-400 (100 MHz) spectrometer at ambient temperature. Chemical shifts were recorded in ppm from the solvent resonance employed as the internal standard ( $\text{CDCl}_3$ : 77.00 ppm,  $\text{CD}_3\text{CN}$ : 1.32 ppm). Chemical shifts were recorded in ppm from the solvent resonance employed as the external standard ( $\text{CFCl}_3$  at 0 ppm). High-resolution mass spectral analysis (HRMS) was performed at Chemical Instrument Center, Nagoya University [JEOL JMS-700 (FAB). HRMS were obtained by fast atom bombardment (FAB) using a double-focusing magnetic sector mass spectrometer. Elemental analyses were performed on a Yanaco MT-6 analyzer. For thin-layer chromatography (TLC) analysis, Merck precoated TLC plates (silica gel 60  $\text{F}_{254}$  0.25 mm or silica gel 60  $\text{NH}_2$   $\text{F}_{254}$  0.20 mm) were used. The products were purified by column chromatography on silica gel (E. Merck Art. 9385). An oil bath was used for reactions that required heating.

In experiments that required dry solvents, toluene, benzene, diethyl ether ( $\text{Et}_2\text{O}$ ), tetrahydrofuran (THF), *N,N*-dimethylformamide (DMF) and dichloromethane ( $\text{CH}_2\text{Cl}_2$ ) were purchased from FUJIFILM Wako Pure Chemical Industries, Ltd. as the “anhydrous” and stored over 4A molecular sieves. Other solvents were purchased from Aldrich Chemical Co., Inc., FUJIFILM Wako Pure Chemical Industries, Ltd., or Tokyo Chemical Industry Co., Ltd. and used without further purification. Oxone ( $\text{KHSO}_5 \cdot 0.5\text{KHSO}_4 \cdot 0.5\text{K}_2\text{SO}_4$ ) and peracetic acid (9% acetic acid solution) were purchased from Aldrich Chemical Co., Inc. and used without further purification. Powdered oxone was prepared according to the known procedure.<sup>1</sup> Other commercially available simple chemicals were analytical-grade and used without further purification.

## Additional Information

**Scheme S1. Comparison of IBS(III) Species 2a–2c in Method C**

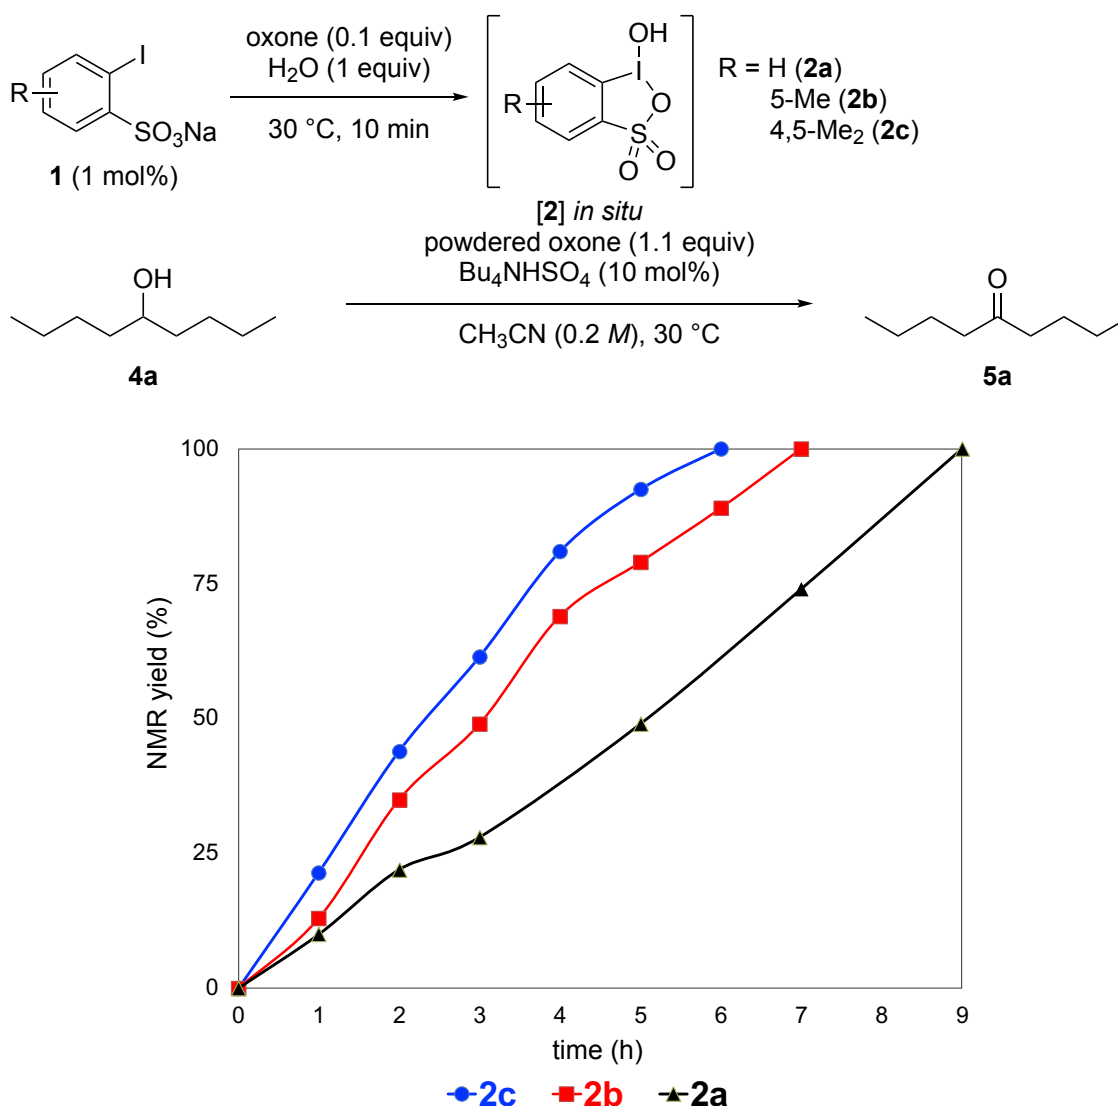

**Scheme S2. Effect of “Buffered” Oxone on the Oxidation Reaction**

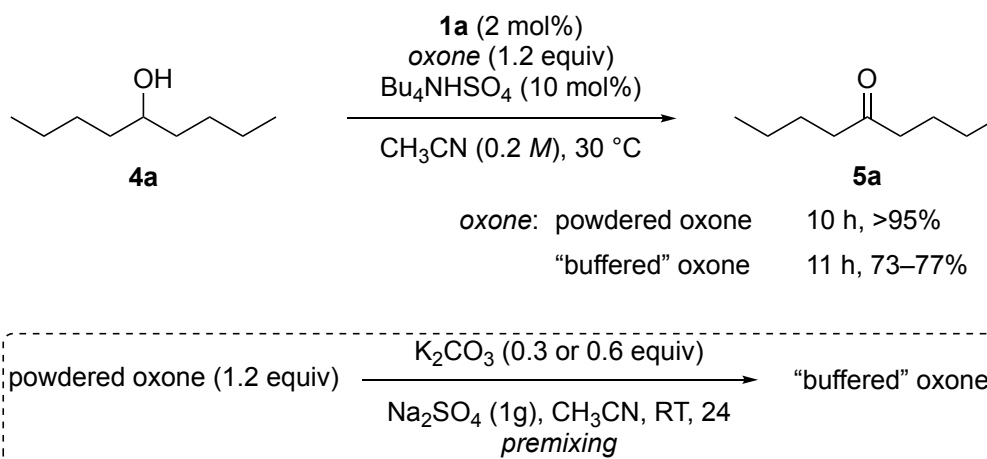

**Table S1. Optimization of Reaction Conditions for Oxidative Esterification**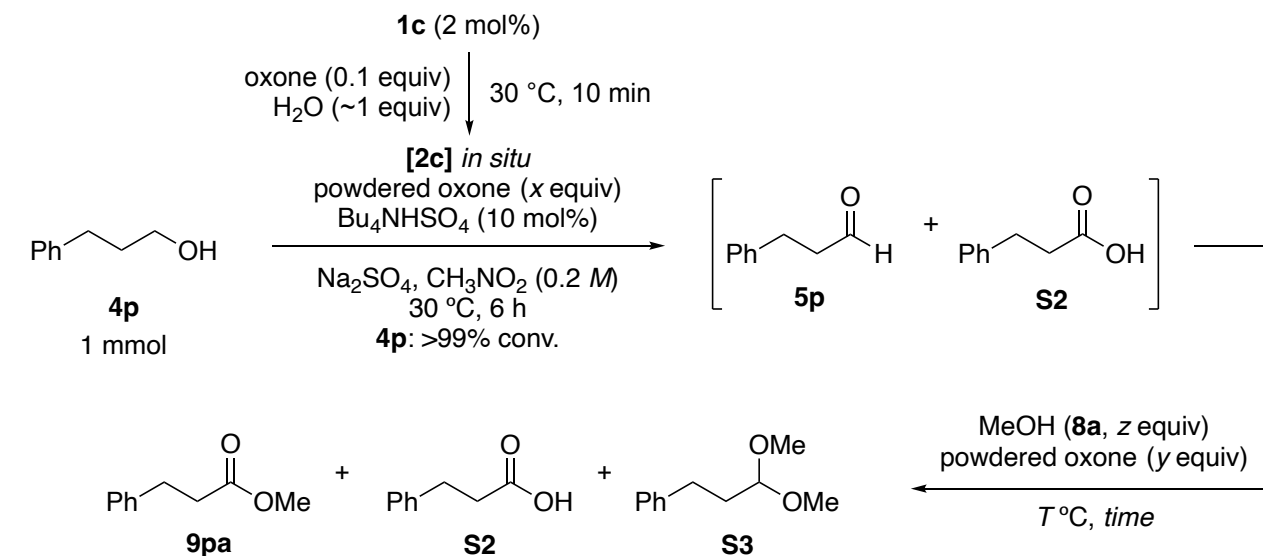

| Entry | Oxone (equiv) |     | 8a (equiv) | T (°C) | Time (h) | Yield (%) <sup>a</sup> |    |    |
|-------|---------------|-----|------------|--------|----------|------------------------|----|----|
|       | x             | y   | z          |        |          | 9pa                    | S2 | S3 |
| 1     | 2.4           | 0   | 2          | 30     | 24       | 44                     | 18 | 32 |
| 2     | 2.4           | 0   | 2          | 50     | 18       | 51                     | 15 | 34 |
| 3     | 3.6           | 0   | 2          | 30     | 18       | 80                     | 5  | 12 |
| 4     | 1.6           | 2.0 | 2          | 30     | 14       | 66                     | 9  | 25 |
| 5     | 1.6           | 2.0 | 10         | 30     | 18       | 60                     | 10 | 30 |
| 6     | 1.6           | 2.0 | 20         | 30     | 18       | 75                     | 6  | 19 |
| 7     | 1.6           | 2.0 | 30         | 30     | 18       | 90                     | 2  | 7  |
| 8     | 1.6           | 2.0 | 40         | 30     | 18       | 90                     | 3  | 7  |
| 9     | 1.6           | 2.0 | 30         | 30     | 24       | 95 (92) <sup>b</sup>   | 5  | –  |

<sup>a</sup> <sup>1</sup>H NMR analysis. <sup>b</sup> Isolated yield.

## EcoScale Calculation

EcoScale scores were calculated for representative reactions to provide a quantitative assessment of the greenness of the methods. The calculations were performed for a 1 mmol scale reaction using the online EcoScale Calculator (available at <https://ecoscale.cheminfo.org/calculator>), which is based on the work of Van Aken et al.<sup>2</sup>

**Table S2. Comparison of The EcoScale for Our Previous and Present Works<sup>a</sup>**

|                                     | Previous work <sup>1a</sup> | This work |
|-------------------------------------|-----------------------------|-----------|
| Oxidation of <b>4b</b> to <b>5b</b> | 45                          | 76        |
| Oxidation of <b>4c</b> to <b>5c</b> | 19.5                        | 68        |

<sup>a</sup> The catalysts employed (e.g., **1a**, **1c**, **2c**) are not commercially listed in the EcoScale calculator database. However, as they are readily synthesized in high yields from inexpensive precursors and common reagents,<sup>1a</sup> the price penalty for these catalysts was considered to be zero in our EcoScale calculations.

Previous method: Oxidation of **4b** to **5b**

| Reagents                            |                                                                                                    |           |                                                                                                                           |         |                      |          |          |          |          |                      |
|-------------------------------------|----------------------------------------------------------------------------------------------------|-----------|---------------------------------------------------------------------------------------------------------------------------|---------|----------------------|----------|----------|----------|----------|----------------------|
| <input checked="" type="checkbox"/> | Link                                                                                               |           |                                                                                                                           |         |                      |          |          |          |          |                      |
| identifier*                         | name                                                                                               | MF*       | MW                                                                                                                        | density | purity*              | ml       | g        | mmoles   | equiv.   |                      |
| 1                                   | <input type="text"/> 4-Methoxybenzyl alcohol                                                       | C8H10O2   | 138.1662                                                                                                                  | 1.1125  | 100%                 | 0.124194 | 0.138166 | 1        | 1        | <input type="text"/> |
| 2                                   | <input type="text"/> Potassium peroxomonosulfate                                                   | H3O18K5S4 | 614.7445                                                                                                                  |         | 100%                 | 0        | 0.368847 | 0.6      | 0.6      | <input type="text"/> |
| 3                                   | <input type="text"/> Sodium sulfate                                                                | Na2O4S    | 142.0371                                                                                                                  | 2.68    | 100%                 | 0.373134 | 1        | 7.040412 | 7.040412 | <input type="text"/> |
| 4                                   | <input type="text"/> Nitromethane                                                                  | CH3NO2    | 61.04032                                                                                                                  | 1.12    | 100%                 | 5        | 5.6      | 91.74263 | 91.74263 | <input type="text"/> |
| Products                            |                                                                                                    |           |                                                                                                                           |         |                      |          |          |          |          |                      |
| identifier*:                        | name:                                                                                              | MF*:      | MW:                                                                                                                       | g:      | mmoles:              | g theor: | yield:   |          |          |                      |
|                                     | p-Anisaldehyde                                                                                     | C8H8O2    | 136.1503                                                                                                                  | 0.052   | 0.3819307            | 0.13615  | 38.1932  |          |          |                      |
| Conditions                          |                                                                                                    |           |                                                                                                                           |         |                      |          |          |          |          |                      |
| Reagents                            |                                                                                                    |           |                                                                                                                           |         |                      |          |          |          |          |                      |
| Name                                | mmoles                                                                                             | eq.       | Bp                                                                                                                        | Hazard  | Price                |          |          |          |          |                      |
| 4-Methoxybenzyl alcohol             | 19.23                                                                                              | 1         | 259                                                                                                                       |         | <input type="text"/> |          |          |          |          |                      |
| Potassium peroxomonosulfate         | 11.53                                                                                              | 0.6       |                                                                                                                           |         | <input type="text"/> |          |          |          |          |                      |
| Sodium sulfate                      | 135.39                                                                                             | 7.04      | 1700                                                                                                                      |         | <input type="text"/> |          |          |          |          |                      |
| Nitromethane                        | 1764.28                                                                                            | 91.74     | 248                                                                                                                       |         | <input type="text"/> |          |          |          |          |                      |
| Yield                               | <input type="text"/>                                                                               |           |                                                                                                                           |         |                      | -31      |          |          |          |                      |
| Price / availability                |                                                                                                    |           |                                                                                                                           |         |                      | -8       |          |          |          |                      |
| Safety                              |                                                                                                    |           |                                                                                                                           |         |                      | 0        |          |          |          |                      |
| Technical setup                     | Possible items<br>Any additional special glassware<br>(Inert) gas atmosphere<br>Glove box          |           | Selected items<br>Common set-up                                                                                           |         | <input type="text"/> |          |          |          |          |                      |
| Temperature / time                  | Possible items<br>Heating, > 1h<br>Cooling to 0°C<br>Cooling, < 0°C                                |           | Selected items<br>Heating, > 1h                                                                                           |         | <input type="text"/> |          |          |          |          |                      |
| Workup and purification             | Possible items<br>Sublimation<br>Liquid - liquid extraction or washing<br>Classical chromatography |           | Selected items<br>Removal of solvent with bp < 150°C<br>Liquid - liquid extraction or washing<br>Classical chromatography |         | <input type="text"/> |          |          |          |          |                      |
| EcoScale                            |                                                                                                    |           |                                                                                                                           |         |                      | 45       |          |          |          |                      |

Current method: Oxidation of **4b** to **5b**

| Reagents                            |                                                                                                    |             |                                                                                                                           |         |                      |          |          |          |          |                      |
|-------------------------------------|----------------------------------------------------------------------------------------------------|-------------|---------------------------------------------------------------------------------------------------------------------------|---------|----------------------|----------|----------|----------|----------|----------------------|
| <input checked="" type="checkbox"/> | Link                                                                                               |             |                                                                                                                           |         |                      |          |          |          |          |                      |
| identifier*                         | name                                                                                               | MF*         | MW                                                                                                                        | density | purity*              | ml       | g        | mmoles   | equiv.   |                      |
| 1                                   | <input type="text"/> 4-Methoxybenzyl alcohol                                                       | C8H10O2     | 138.1662                                                                                                                  | 1.1125  | 100%                 | 0.124194 | 0.138166 | 1        | 1        | <input type="text"/> |
| 2                                   | <input type="text"/> Potassium peroxomonosulfate                                                   | H3O18K5S4   | 614.7445                                                                                                                  |         | 100%                 | 0        | 0.368847 | 0.6      | 0.6      | <input type="text"/> |
| 3                                   | <input type="text"/> Tetrabutylammonium hydrogen sulfate                                           | C16H35N . H | 339.5340                                                                                                                  |         | 100%                 | 0        | 0.033953 | 0.1      | 0.1      | <input type="text"/> |
| 4                                   | <input type="text"/> Sodium sulfate                                                                | Na2O4S      | 142.0371                                                                                                                  | 2.68    | 100%                 | 0.373134 | 1        | 7.040412 | 7.040412 | <input type="text"/> |
| 5                                   | <input type="text"/> Nitromethane                                                                  | CH3NO2      | 61.04032                                                                                                                  | 1.12    | 100%                 | 5        | 5.6      | 91.74263 | 91.74263 | <input type="text"/> |
| Products                            |                                                                                                    |             |                                                                                                                           |         |                      |          |          |          |          |                      |
| identifier*:                        | name:                                                                                              | MF*:        | MW:                                                                                                                       | g:      | mmoles:              | g theor: | yield:   |          |          |                      |
|                                     | p-Anisaldehyde                                                                                     | C8H8O2      | 136.1503                                                                                                                  | 0.123   | 0.903413             | 0.13615  | 90.3415  |          |          |                      |
| Conditions                          |                                                                                                    |             |                                                                                                                           |         |                      |          |          |          |          |                      |
| Reagents                            |                                                                                                    |             |                                                                                                                           |         |                      |          |          |          |          |                      |
| Name                                | mmoles                                                                                             | eq.         | Bp                                                                                                                        | Hazard  | Price                |          |          |          |          |                      |
| 4-Methoxybenzyl alcohol             | 8.13                                                                                               | 1           | 259                                                                                                                       |         | <input type="text"/> |          |          |          |          |                      |
| Potassium peroxomonosulfate         | 4.87                                                                                               | 0.6         |                                                                                                                           |         | <input type="text"/> |          |          |          |          |                      |
| Tetrabutylammonium hydrogen sulfate | 0.81                                                                                               | 0.1         |                                                                                                                           |         | <input type="text"/> |          |          |          |          |                      |
| Sodium sulfate                      | 57.23                                                                                              | 7.04        | 1700                                                                                                                      |         | <input type="text"/> |          |          |          |          |                      |
| Nitromethane                        | 745.87                                                                                             | 91.74       | 248                                                                                                                       |         | <input type="text"/> |          |          |          |          |                      |
| Yield                               | <input type="text"/>                                                                               |             |                                                                                                                           |         |                      | -5       |          |          |          |                      |
| Price / availability                |                                                                                                    |             |                                                                                                                           |         |                      | -5       |          |          |          |                      |
| Safety                              |                                                                                                    |             |                                                                                                                           |         |                      | 0        |          |          |          |                      |
| Technical setup                     | Possible items<br>Any additional special glassware<br>(Inert) gas atmosphere<br>Glove box          |             | Selected items<br>Common set-up                                                                                           |         | <input type="text"/> |          |          |          |          |                      |
| Temperature / time                  | Possible items<br>Room temperature, < 1h<br>Room temperature, < 24h<br>Heating, < 1h               |             | Selected items<br>Room temperature, < 24h                                                                                 |         | <input type="text"/> |          |          |          |          |                      |
| Workup and purification             | Possible items<br>Sublimation<br>Liquid - liquid extraction or washing<br>Classical chromatography |             | Selected items<br>Removal of solvent with bp < 150°C<br>Liquid - liquid extraction or washing<br>Classical chromatography |         | <input type="text"/> |          |          |          |          |                      |
| EcoScale                            |                                                                                                    |             |                                                                                                                           |         |                      | 76       |          |          |          |                      |

Previous method: Oxidation of **4c** to **5c**

| Reagents                                 |                                                                                                    |                               |                                                                                                                           |          |          |         |          |          |          |          |  |
|------------------------------------------|----------------------------------------------------------------------------------------------------|-------------------------------|---------------------------------------------------------------------------------------------------------------------------|----------|----------|---------|----------|----------|----------|----------|--|
| <input checked="" type="checkbox"/> Link |                                                                                                    |                               |                                                                                                                           |          |          |         |          |          |          |          |  |
|                                          | Identifier*                                                                                        | name                          | MF*                                                                                                                       | MW       | density  | purity* | ml       | g        | mmoles   | equiv.   |  |
| 1                                        | <input type="text"/>                                                                               | 1,2,3,4-Tetrahydro-1-naphthol | C10H12O                                                                                                                   | 148.2046 | 1.09     | 100%    | 0.140976 | 0.153664 | 1.036835 | 1        |  |
| 2                                        | <input type="text"/>                                                                               | Potassium peroxomonosulfate   | H3O18K5S4                                                                                                                 | 614.7445 |          | 100%    | 0        | 0.382433 | 0.622101 | 0.6      |  |
| 3                                        | <input type="text"/>                                                                               | Acetonitrile                  | CH3CN                                                                                                                     | 41.05252 | 0.781    | 100%    | 5        | 3.905    | 95.12205 | 91.74263 |  |
| Products                                 |                                                                                                    |                               |                                                                                                                           |          |          |         |          |          |          |          |  |
|                                          | Identifier*:                                                                                       | name:                         | MF*:                                                                                                                      | MW:      | g:       | mmoles: | g theor: | yield:   |          |          |  |
|                                          |                                                                                                    | alpha-Tetralone               | C10H10O                                                                                                                   | 146.1888 | 0.024852 | 0.17    | 0.151574 | 16.396   |          |          |  |
| Conditions                               |                                                                                                    |                               |                                                                                                                           |          |          |         |          |          |          |          |  |
| Reagents                                 | Name                                                                                               | mmoles                        | eq.                                                                                                                       | Bp       | Hazard   | Price   |          |          |          |          |  |
|                                          | 1,2,3,4-Tetrahydro-1-naphthol                                                                      | 41.72                         | 1                                                                                                                         | NaN      |          |         |          |          |          |          |  |
|                                          | Potassium peroxomonosulfate                                                                        | 25.03                         | 0.6                                                                                                                       |          |          |         |          |          |          |          |  |
|                                          | Acetonitrile                                                                                       | 3827.54                       | 91.74                                                                                                                     | NaN      |          |         |          |          |          |          |  |
| Yield                                    | 17                                                                                                 |                               |                                                                                                                           |          |          |         | -41.5    |          |          |          |  |
| Price / availability                     |                                                                                                    |                               |                                                                                                                           |          |          |         | -13      |          |          |          |  |
| Safety                                   |                                                                                                    |                               |                                                                                                                           |          |          |         | -10      |          |          |          |  |
| Technical setup                          | Possible items<br>Any additional special glassware<br>(Inert) gas atmosphere<br>Glove box          |                               | Selected items<br>Common set-up                                                                                           |          | 0        |         |          |          |          |          |  |
| Temperature / time                       | Possible items<br>Heating, > 1h<br>Cooling to 0°C<br>Cooling, < 0°C                                |                               | Selected items<br>Heating, > 1h                                                                                           |          | -3       |         |          |          |          |          |  |
| Workup and purification                  | Possible items<br>Sublimation<br>Liquid - liquid extraction or washing<br>Classical chromatography |                               | Selected items<br>Removal of solvent with bp < 150°C<br>Liquid - liquid extraction or washing<br>Classical chromatography |          | -13      |         |          |          |          |          |  |
| EcoScale                                 |                                                                                                    |                               |                                                                                                                           |          |          |         | 19.5     |          |          |          |  |

Current method: Oxidation of **4c** to **5c**

| Reagents                                 |                                                                                                    |                                     |                                                                                                                           |          |         |          |          |          |          |          |  |
|------------------------------------------|----------------------------------------------------------------------------------------------------|-------------------------------------|---------------------------------------------------------------------------------------------------------------------------|----------|---------|----------|----------|----------|----------|----------|--|
| <input checked="" type="checkbox"/> Link |                                                                                                    |                                     |                                                                                                                           |          |         |          |          |          |          |          |  |
|                                          | Identifier*                                                                                        | name                                | MF*                                                                                                                       | MW       | density | purity*  | ml       | g        | mmoles   | equiv.   |  |
| 1                                        | <input type="text"/>                                                                               | 1,2,3,4-Tetrahydro-1-naphthol       | C10H12O                                                                                                                   | 148.2046 | 1.09    | 100%     | 0.135968 | 0.148205 | 1        | 1        |  |
| 2                                        | <input type="text"/>                                                                               | Potassium peroxomonosulfate         | H3O18K5S4                                                                                                                 | 614.7445 |         | 100%     | 0        | 0.368847 | 0.6      | 0.6      |  |
| 3                                        | <input type="text"/>                                                                               | Tetrabutylammonium hydrogen sulfate | C16H35N .1                                                                                                                | 339.5340 |         | 100%     | 0        | 0.033953 | 0.1      | 0.1      |  |
| 4                                        | <input type="text"/>                                                                               | Acetonitrile                        | CH3CN                                                                                                                     | 41.05252 | 0.781   | 100%     | 5        | 3.905    | 95.12205 | 95.12205 |  |
| Products                                 |                                                                                                    |                                     |                                                                                                                           |          |         |          |          |          |          |          |  |
|                                          | Identifier*:                                                                                       | name:                               | MF*:                                                                                                                      | MW:      | g:      | mmoles:  | g theor: | yield:   |          |          |  |
|                                          |                                                                                                    | alpha-Tetralone                     | C10H10O                                                                                                                   | 146.1888 | 0.14    | 0.957665 | 0.146189 | 95.76639 |          |          |  |
| Conditions                               |                                                                                                    |                                     |                                                                                                                           |          |         |          |          |          |          |          |  |
| Reagents                                 | Name                                                                                               | mmoles                              | eq.                                                                                                                       | Bp       | Hazard  | Price    |          |          |          |          |  |
|                                          | 1,2,3,4-Tetrahydro-1-naphthol                                                                      | 7.14                                | 1                                                                                                                         | NaN      |         |          |          |          |          |          |  |
|                                          | Potassium peroxomonosulfate                                                                        | 4.28                                | 0.6                                                                                                                       |          |         |          |          |          |          |          |  |
|                                          | Tetrabutylammonium hydrogen sulfate                                                                | 0.71                                | 0.1                                                                                                                       |          |         |          |          |          |          |          |  |
|                                          | Acetonitrile                                                                                       | 679.44                              | 95.12                                                                                                                     | 81       |         |          |          |          |          |          |  |
| Yield                                    | 96                                                                                                 |                                     |                                                                                                                           |          |         |          | -2       |          |          |          |  |
| Price / availability                     |                                                                                                    |                                     |                                                                                                                           |          |         |          | -6       |          |          |          |  |
| Safety                                   |                                                                                                    |                                     |                                                                                                                           |          |         |          | -10      |          |          |          |  |
| Technical setup                          | Possible items<br>Any additional special glassware<br>(Inert) gas atmosphere<br>Glove box          |                                     | Selected items<br>Common set-up                                                                                           |          | 0       |          |          |          |          |          |  |
| Temperature / time                       | Possible items<br>Room temperature, < 1h<br>Room temperature, < 24h<br>Heating, < 1h               |                                     | Selected items<br>Room temperature, < 24h                                                                                 |          | -1      |          |          |          |          |          |  |
| Workup and purification                  | Possible items<br>Sublimation<br>Liquid - liquid extraction or washing<br>Classical chromatography |                                     | Selected items<br>Removal of solvent with bp < 150°C<br>Liquid - liquid extraction or washing<br>Classical chromatography |          | -13     |          |          |          |          |          |  |
| EcoScale                                 |                                                                                                    |                                     |                                                                                                                           |          |         |          | 68       |          |          |          |  |

## Catalysts and Substrates

Pre-IBSs **1a–1c** were prepared according to the known procedures.<sup>2</sup> **1a** and **1b** (as their potassium salts) are also commercially available from Junsei Chemical or Sigma-Aldrich.

Alcohols **4a–4j**, **4l–4u**, and **6** were purchased from Aldrich Chemical Co., Inc., FUJIFILM Wako Pure Chemical Industries, Ltd., or Tokyo Chemical Industry Co., Ltd. and used without further purification. **1k**<sup>3</sup> is a known compound and was prepared by following the literature procedures.

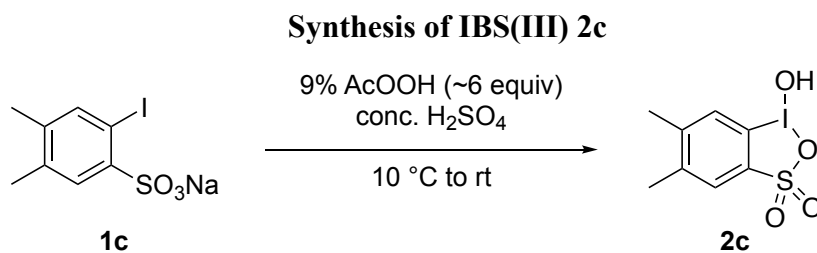

Procedure adapted from literature.<sup>4</sup> To a stirred mixture of **1c** (as 1.5 hydrate, 1.60 g, 4.43 mmol) and concentrated H<sub>2</sub>SO<sub>4</sub> (0.600 mL), maintained at ~10 °C under a nitrogen atmosphere, was added peroxyacetic acid (9 wt% acetic acid solution, 22.0 mL) dropwise. The mixture was stirred at 10 °C and then allowed to stir overnight at room temperature. Diethyl ether (20 mL) was added to the mixture to precipitate solids, which were collected by filtration and washed with cold diethyl ether and cold water. The resulting solid was suspended in acetonitrile (20.0 mL) and water (10.0 mL), and the mixture was heated to 70 °C until most of the solids dissolved. The hot mixture was filtered, allowed to cool to room temperature, and then kept overnight to allow crystallization. The precipitated solid was filtrated and washed with cold diethyl ether to afford **2c** (0.609 g, 1.86 mmol). The filtrate was concentrated to one-third of its original volume to give a second crop of solid (0.416 g, 1.27 mmol). Combined yield: 3.13 mmol, 71%.

**1-Hydroxy-5,6-dimethyl-1H-1λ<sup>3</sup>-benzo[d][1,2,3]iodaoxathiole 3,3-dioxide (2c):**<sup>1</sup> White powder. <sup>1</sup>H NMR (CD<sub>3</sub>CN, 400 MHz) δ 2.23 (s, 3H), 2.24 (s, 3H), 7.78 (s, 1H), 7.82 (s, 1H); <sup>13</sup>C NMR (CD<sub>3</sub>CN, 100 MHz) δ 19.4, 20.6, 109.6, 126.5, 130.0, 138.0, 142.8, 145.8. Anal. Calcd for C<sub>8</sub>H<sub>9</sub>IO<sub>4</sub>S: C, 29.28; H, 2.76. Found: C, 29.18; H, 2.69.



## Representative Procedures for Oxidation of Primary Alcohols to Aldehydes

### Previous Method (Method A):

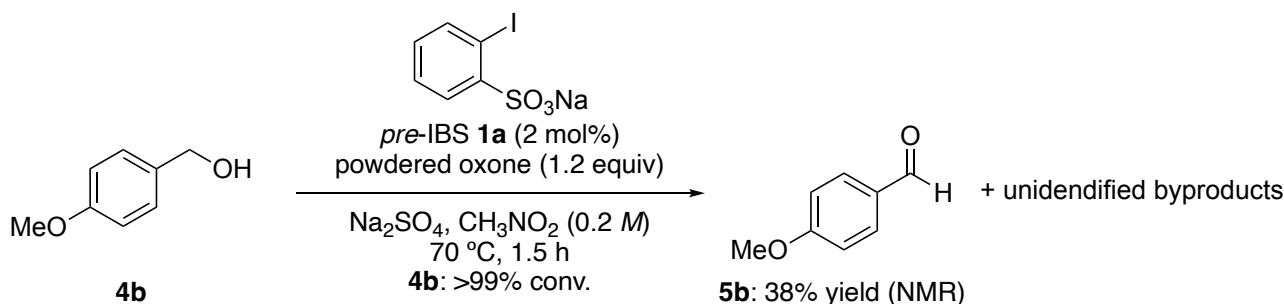

To a rigorously stirring mixture of powdered oxone (0.369 g, 1.20 mmol, 1.2 equiv), **1a** (as a monohydrate, 0.00650 g, 0.0200 mmol, 2 mol%), biphenyl (0.0771 g, 0.500 mmol, as an internal standard) and anhydrous  $\text{Na}_2\text{SO}_4$  (1.00 g, pre-dried under vacuum with a heat gun) in  $\text{CH}_3\text{NO}_2$  (5.00 mL, 0.200 M) was added **4b** (0.138 g, 1.00 mmol) at room temperature under a nitrogen atmosphere. The reaction mixture was then heated to  $70^\circ\text{C}$  and monitored by TLC and  $^1\text{H}$  NMR analysis. Upon completion, the mixture was cooled to room temperature, filtered through a tightly packed celite plug, and washed thoroughly with diethyl ether. The combined filtrates were washed with water (2 x 5 mL) and brine (1 x 5 mL), dried over anhydrous  $\text{MgSO}_4$ , and concentrated under reduced pressure. The yield of the **5b** was determined to be 38% by  $^1\text{H}$  NMR analysis of the crude using biphenyl as a calibrated internal standard. Multiple unidentified byproducts were observed, indicating competing side reactions under the reaction conditions.

### Current Method (Method B):

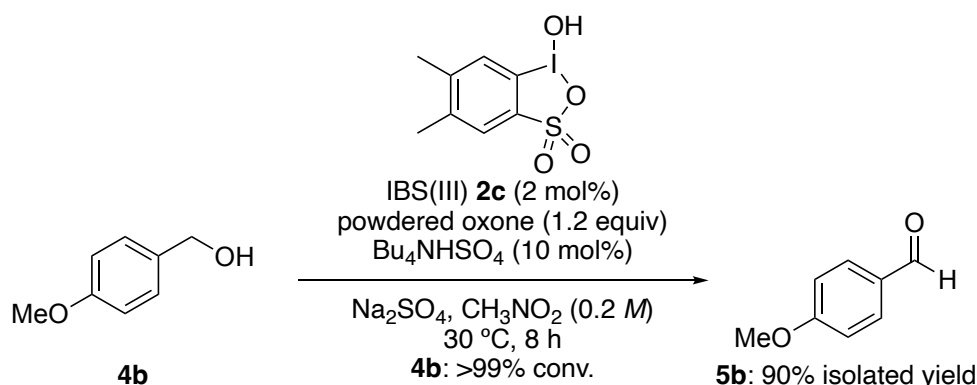

To a rigorously stirring mixture of powdered oxone (0.369 g, 1.20 mmol), **2c** (0.00660 g, 0.0200 mmol, 2 mol%),  $\text{Bu}_4\text{NH}\text{SO}_4$  (0.0340 g, 0.100 mmol, 10 mol%) and anhydrous  $\text{Na}_2\text{SO}_4$  (1.00 g, pre-dried under vacuum with a heat gun) in  $\text{CH}_3\text{NO}_2$  (5.00 mL, 0.200 M) was added **4b** (0.138 g, 1.00 mmol) at  $30^\circ\text{C}$  using a thermostated bath under a nitrogen atmosphere. The reaction progress was monitored by TLC analysis. Upon completion, the mixture was filtered through a tightly packed celite plug and washed thoroughly with diethyl ether. The combined filtrates were washed with water (2 x 5 mL) and brine (1 x 5 mL), dried over anhydrous  $\text{MgSO}_4$ , and concentrated under reduced pressure.

The crude product was purified by flash column chromatography on silica gel (E. Merck Art. 9385, eluent: hexane–Et<sub>2</sub>O = 10:1) to afford product **5b** (0.123 g, 0.903 mmol, 90% yield) in analytically pure form.

**4-Methoxybenzaldehyde (5b):** This compound is commercially available. The spectral and physical data were consistent with those of an authentic sample. Colorless oil; **TLC**,  $R_f$  = 0.23 (hexane–EtOAc = 4:1); **<sup>1</sup>H NMR** (CDCl<sub>3</sub>, 400 MHz)  $\delta$  3.90 (s, 3H), 7.01 (td,  $J$  = 2.3, 9.6 Hz, 2H), 7.85 (td,  $J$  = 2.3, 9.2 Hz, 2H), 9.89 (s, 1H); **<sup>13</sup>C NMR** (CDCl<sub>3</sub>, 100 MHz)  $\delta$  55.4, 114.1, 129.7, 131.8, 164.4, 190.6.

#### Current Method (Method C):

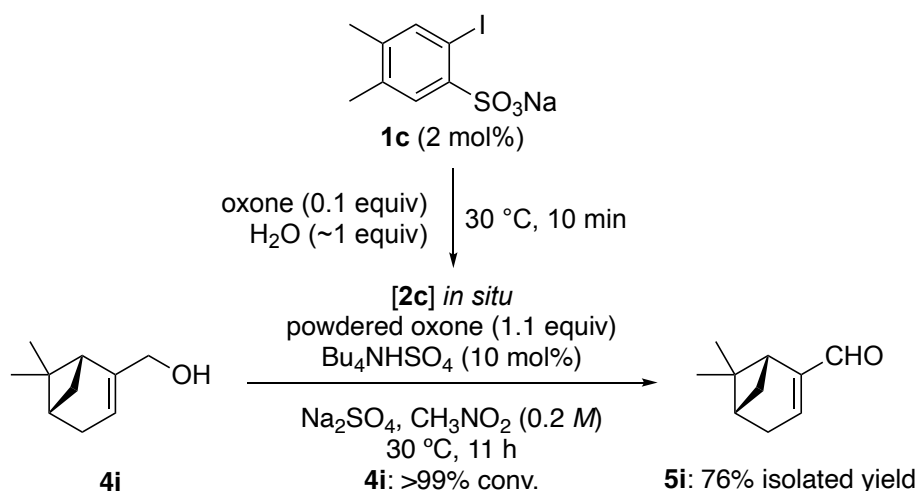

A mixture of **1c** (as 1.5 hydrate, 0.00720 g, 0.0200 mmol, 2 mol%), oxone (0.0307 g, 0.100 mmol), and H<sub>2</sub>O (ca. 20  $\mu$ L) was stirred at 30 °C for 10 min. To this stirring mixture were added powdered oxone (0.338 g, 1.10 mmol), Bu<sub>4</sub>NHSO<sub>4</sub> (0.0340 g, 0.100 mmol, 10 mol%), anhydrous Na<sub>2</sub>SO<sub>4</sub> (1.00 g, pre-dried under vacuum with a heat gun), CH<sub>3</sub>NO<sub>2</sub> (5.00 mL, 0.200 M), and **4i** (0.152 g, 1.00 mmol) at 30 °C using a thermostated bath under a nitrogen atmosphere. The reaction progress was monitored by TLC analysis. Upon completion, the mixture was filtered through a tightly packed celite plug and washed with diethyl ether. The combined organic layers were washed with water (2 x 5 mL) and brine (1 x 5 mL), dried over anhydrous MgSO<sub>4</sub>, and concentrated under reduced pressure. The crude products were purified by column chromatography on silica gel (eluent: hexane–EtOAc = 10:1) to yield **5i** (0.114 g, 0.761 mmol, 76% yield) in analytically pure form.

*cf.* Method A, 8 h: **4i**, >99% conv.; **5i**, 25% NMR yield (multiple unidentified byproducts were observed).

**(1R,5S)-6,6-Dimethylbicyclo[3.1.1]hept-2-ene-2-carbaldehyde (5i):** This compound is commercially available. The spectral and physical data were consistent with those of an authentic sample. This compound was purified by flash column chromatography on silica gel (E. Merck Art. 9385, eluent: hexane–Et<sub>2</sub>O = 30:1). Colorless oil; **TLC**,  $R_f$  = 0.48 (hexane–EtOAc = 10:1); **<sup>1</sup>H NMR** (CDCl<sub>3</sub>, 400 MHz)  $\delta$  0.75 (s, 3H), 1.06 (d,  $J$  = 9.6 Hz, 1H), 1.34 (s, 3H), 2.18–2.22 (m, 1H), 2.49 (td,

$J = 4.6, 9.6$  Hz, 1H), 2.57 (td,  $J = 3.0, 10.1$  Hz, 2H), 2.87 (t,  $J = 5.5$  Hz, 1H), 6.72 (sept,  $J = 1.5$  Hz, 1H), 9.44 (s 1H);  $^{13}\text{C}$  NMR ( $\text{CDCl}_3$ , 100 MHz)  $\delta$  20.9, 25.6, 31.0, 33.0, 37.5, 38.0, 40.6, 147.9, 151.4, 191.3.

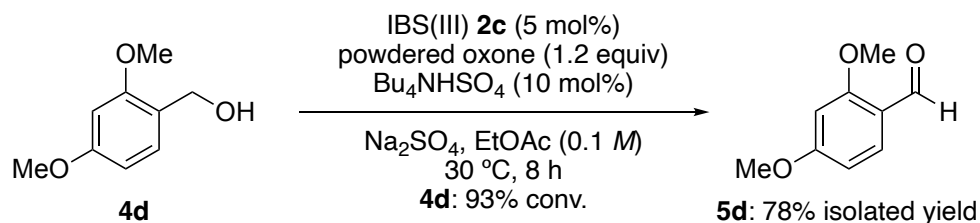

*cf.* Method A [ $\mathbf{1a}$  (5 mol%), EtOAc (0.1 M)], 3 h:  $\mathbf{4d}$ , 90% conv.;  $\mathbf{5d}$ , 2% NMR yield (multiple unidentified byproducts were observed).

**2,4-Dimethoxybenzaldehyde ( $\mathbf{5d}$ ):** Method B, 78% yield (0.130 g, 0.783 mmol). This compound is commercially available. The spectral and physical data were consistent with those of an authentic sample. This compound was purified by flash column chromatography on silica gel (E. Merck Art. 9385, eluent: hexane– $\text{Et}_2\text{O}$  = 10:1). Colorless oil; TLC,  $R_f$  = 0.25 (hexane–EtOAc = 4:1);  $^1\text{H}$  NMR ( $\text{CDCl}_3$ , 400 MHz)  $\delta$  3.88 (s, 3H), 3.91 (s, 3H), 6.45 (d,  $J = 1.8$  Hz, 1H), 6.56 (dd,  $J = 1.8, 8.7$  Hz, 1H), 7.82 (d,  $J = 8.7$  Hz, 1H), 10.30 (s, 1H);  $^{13}\text{C}$  NMR ( $\text{CDCl}_3$ , 100 MHz)  $\delta$  55.5, 55.6, 97.8, 105.7, 118.9, 130.6, 163.5, 166.1, 188.3.

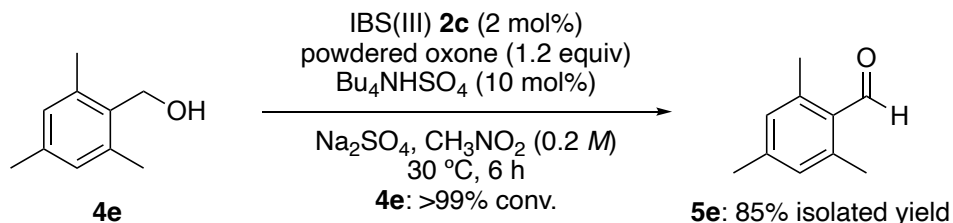

*cf.* Method A, 2 h:  $\mathbf{4e}$ , >99% conv.;  $\mathbf{5e}$ , 10% NMR yield. Dibenzyl ether, a dehydrative dimerization byproduct, was obtained as a main byproduct in 70% yield.

**2,4,6-Trimethylbenzaldehyde ( $\mathbf{5e}$ ):** Method B, 85% yield (0.126 g, 0.853 mmol). This compound is commercially available. The spectral and physical data were consistent with those of an authentic sample. This compound was purified by flash column chromatography on silica gel (E. Merck Art. 9385, eluent: hexane– $\text{Et}_2\text{O}$  = 10:1). Colorless oil; TLC,  $R_f$  = 0.55 (hexane–EtOAc = 4:1);  $^1\text{H}$  NMR ( $\text{CDCl}_3$ , 400 MHz)  $\delta$  2.32 (s 3H), 2.59 (s 6H), 6.91 (s, 2H), 10.57 (s, 1H);  $^{13}\text{C}$  NMR ( $\text{CDCl}_3$ , 100 MHz)  $\delta$  20.5, 21.4, 129.9, 130.5, 141.4, 143.8, 192.9.

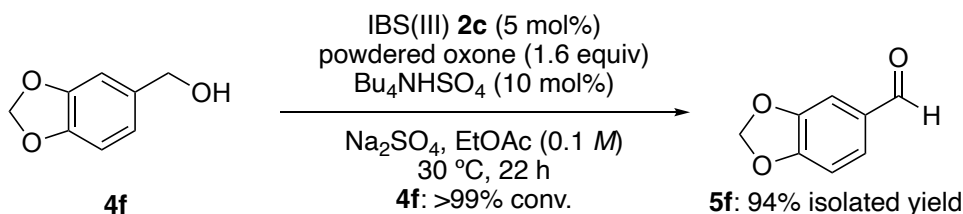

*cf.* Method A [**1a** (5 mol%), oxone (1.6 equiv), EtOAc (0.1 *M*)], 14 h: **4f**, 93% conv.; **5f**, 14% NMR yield (multiple unidentified byproducts were observed).

**Benzo[*d*][1,3]dioxole-5-carbaldehyde (5f)**: Method B, 94% yield (0.141 g, 0.939 mmol). This compound is commercially available. The spectral and physical data were consistent with those of an authentic sample. This compound was purified by flash column chromatography on silica gel (E. Merck Art. 9385, eluent: hexane–Et<sub>2</sub>O = 10:1). Colorless oil; **TLC**, *R<sub>f</sub>* = 0.34 (hexane–EtOAc = 4:1); **<sup>1</sup>H NMR** (CDCl<sub>3</sub>, 400 MHz) δ 6.09 (s, 2H), 6.94 (d, *J* = 8.2 Hz, 1H), 7.34 (d, *J* = 1.4 Hz, 1H), 7.43 (dd, *J* = 1.4, 7.8 Hz, 1H), 9.82 (s, 1H); **<sup>13</sup>C NMR** (CDCl<sub>3</sub>, 100 MHz) δ 102.1, 106.9, 108.3, 128.7, 131.8, 148.7, 153.1, 190.3.

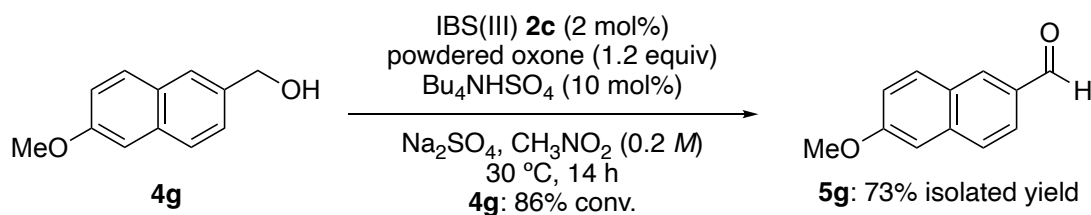

*cf.* Method A, 7 h: **4f**, >95% conv.; **5g**, 11% NMR yield (multiple unidentified byproducts were observed).

**6-Methoxy-2-naphthaldehyde (5g)**: Method B, 73% yield (0.135 g, 0.726 mmol). This compound is commercially available. The spectral and physical data were consistent with those of an authentic sample. This compound was purified by flash column chromatography on silica gel (E. Merck Art. 9385, eluent: hexane–Et<sub>2</sub>O = 20:1). Pale yellow oil; **TLC**, *R<sub>f</sub>* = 0.23 (hexane–EtOAc = 10:1); **<sup>1</sup>H NMR** (CDCl<sub>3</sub>, 400 MHz) δ 3.97 (s, 3H), 7.19 (d, *J* = 2.3 Hz, 1H), 7.24 (dd, *J* = 2.3, 9.2 Hz, 1H), 7.81 (d, *J* = 8.2 Hz, 1H), 7.90 (d, *J* = 9.2 Hz, 1H), 7.93 (dd, *J* = 1.4, 8.7 Hz, 1H), 8.26 (s, 1H), 10.10 (s, 1H); **<sup>13</sup>C NMR** (CDCl<sub>3</sub>, 100 MHz) δ 55.4, 106.0, 119.8, 123.5, 127.6, 127.8, 131.0, 132.2, 134.2, 138.1, 160.1, 191.9.

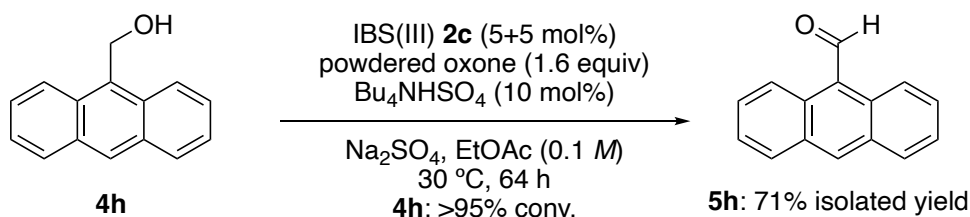

*cf.* Method A [**1a** (10 mol%), oxone (1.6 equiv), EtOAc (0.1 *M*)], 24 h: **4h**, >99% conv.; **5h**, 17%

NMR yield (multiple unidentified byproducts were observed).

**Anthracene-9-carbaldehyde (5h):** Method B (after 16 h, **2c** (5 mol%) was further added), 71% yield (0.146 g, 0.707 mmol). This compound is commercially available. The spectral and physical data were consistent with those of an authentic sample. This compound was purified by flash column chromatography on silica gel (E. Merck Art. 9385, eluent: hexane–Et<sub>2</sub>O = 50:1). Yellow solid; **TLC**, *R<sub>f</sub>* = 0.37 (hexane–EtOAc = 10:1); **<sup>1</sup>H NMR** (CDCl<sub>3</sub>, 400 MHz) δ 7.55–7.59 (m, 2H), 7.68–7.72 (m, 2H), 8.09 (d, *J* = 8.7 Hz, 2H), 8.73 (s, 1H), 9.01 (d, *J* = 9.2 Hz, 2H), 11.56 (s, 1H); **<sup>13</sup>C NMR** (CDCl<sub>3</sub>, 100 MHz) δ 123.5, 124.6, 125.7, 129.1, 129.3, 131.0, 132.1, 135.2, 193.0.

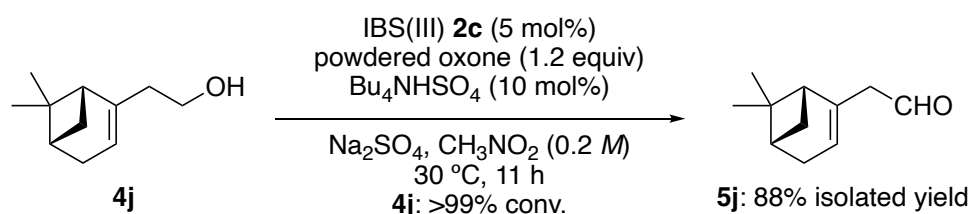

*cf.* Method A [**1a** (5 mol%)], 3 h: **4j**, >99% conv.; **5j**, 6% NMR yield (multiple unidentified byproducts were observed).

**2-((1*R*,5*S*)-6,6-Dimethylbicyclo[3.1.1]hept-2-en-2-yl)acetaldehyde (5j):** Method B, 88% yield (0.145 g, 0.881 mmol). This compound is commercially available. The spectral and physical data were consistent with those of an authentic sample. This compound was purified by flash column chromatography on silica gel (E. Merck Art. 9385, eluent: hexane–Et<sub>2</sub>O = 30:1). Yellow oil; **TLC**, *R<sub>f</sub>* = 0.63 (hexane–EtOAc = 10:1); **<sup>1</sup>H NMR** (CDCl<sub>3</sub>, 400 MHz) δ 0.86 (s, 3H), 1.22 (d, *J* = 8.7 Hz, 1H), 1.28 (s, 3H), 2.05 (dt, *J* = 1.4, 5.5 Hz, 1H), 2.10–2.14 (m, 1H), 2.22–2.36 (m, 2H), 2.40 (td, *J* = 4.4, 8.7 Hz, 1H), 3.06 (q, *J* = 1.2 Hz, 2H), 5.47 (quin, *J* = 1.4 Hz, 1H), 9.59 (t, *J* = 2.8 Hz, 1H); **<sup>13</sup>C NMR** (CDCl<sub>3</sub>, 100 MHz) δ 21.1, 26.1, 31.5, 31.6, 38.2, 40.3, 46.0, 51.9, 122.5, 139.3, 200.1.

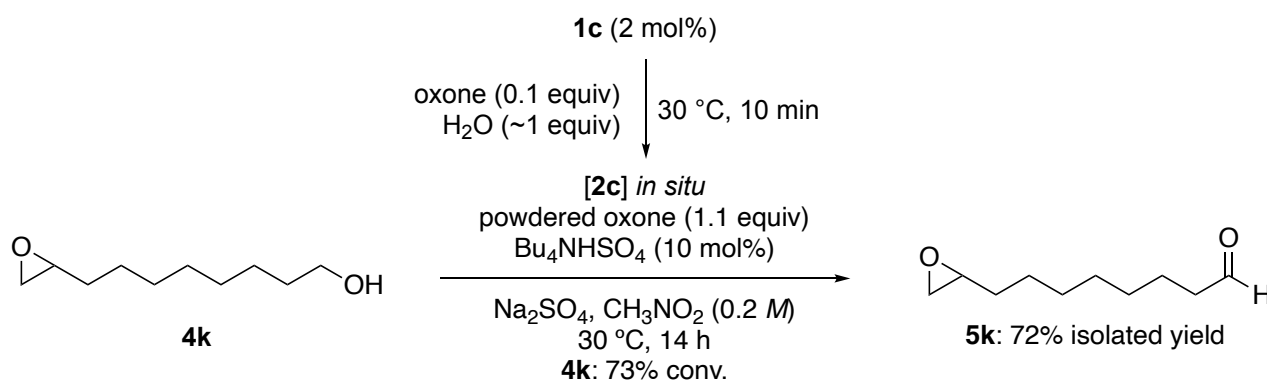

*cf.* Method A, 8 h: **4k**, >99% conv.; **5k**, 11% NMR yield (multiple unidentified byproducts were observed).

**8-(Oxiran-2-yl)octanal (5k):**<sup>5</sup> Method C, 72% yield (0.123 g, 0.722 mmol). This compound was purified by flash column chromatography on silica gel (E. Merck Art. 9385, eluent: hexane–Et<sub>2</sub>O =

10:1). Pale yellow oil; **TLC**,  $R_f$  = 0.38 (hexane–EtOAc = 4:1);  $^1\text{H}$  **NMR** ( $\text{CDCl}_3$ , 400 MHz)  $\delta$  1.33–1.67 (m, 12H), 2.43 (dt,  $J$  = 1.8, 7.3 Hz, 2H), 2.47 (dd,  $J$  = 2.8, 5.0 Hz, 1H), 2.75 (dd,  $J$  = 4.1, 5.0 Hz, 1H), 2.88–2.93 (m, 1H), 9.77 (t,  $J$  = 1.8 Hz, 1H);  $^{13}\text{C}$  **NMR** ( $\text{CDCl}_3$ , 100 MHz)  $\delta$  21.8, 25.7, 28.8, 28.97, 29.03, 32.2, 43.6, 46.8, 52.1, 202.6.

## Representative Procedures for Oxidation of Secondary Alcohols to Ketones

### Previous Method (Method A):

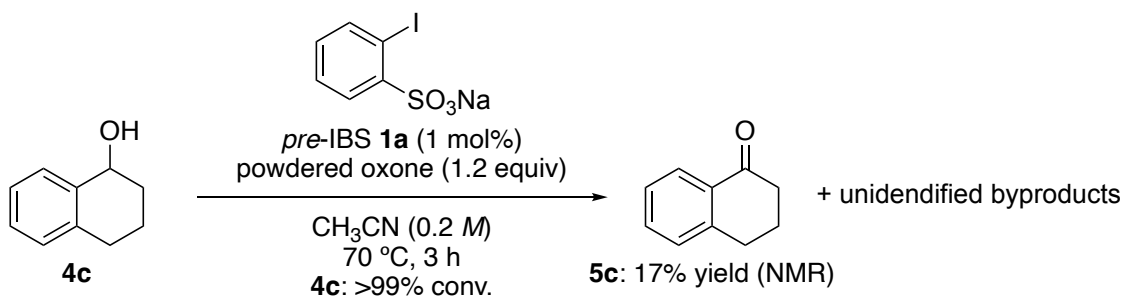

To a rigorously stirring mixture of powdered oxone (0.369 g, 1.20 mmol, 1.2 equiv), **1a** (as a monohydrate, 0.00320 g, 0.0100 mmol, 1 mol%), and biphenyl (0.0771 g, 0.500 mmol, as an internal standard) in  $\text{CH}_3\text{CN}$  (5.00 mL, 0.200 M) was added **4c** (0.148 g, 1.00 mmol) at room temperature under a nitrogen atmosphere. The reaction mixture was then heated to 70 °C and monitored by TLC and  $^1\text{H}$  NMR analysis. Upon completion, the mixture was cooled to room temperature, filtered through a tightly packed celite plug, and washed thoroughly with diethyl ether. The combined filtrates were washed with water (2 x 5 mL) and brine (1 x 5 mL), dried over anhydrous  $\text{MgSO}_4$ , and concentrated under reduced pressure. The yield of the **5c** was determined to be 17% by  $^1\text{H}$  NMR analysis of the crude using biphenyl as a calibrated internal standard. Multiple unidentified byproducts were observed, indicating competing side reactions under the reaction conditions.

### Current Method (Method B):

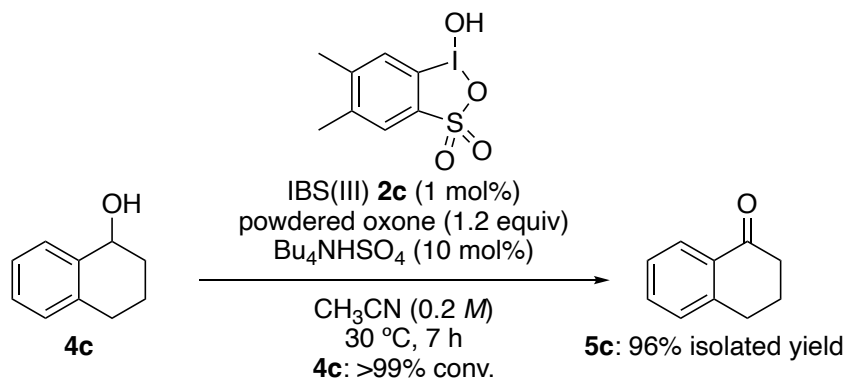

To a rigorously stirring mixture of powdered oxone (0.369 g, 1.20 mmol), **2c** (0.00330 g, 0.0100 mmol, 1 mol%),  $\text{Bu}_4\text{NHSO}_4$  (0.0340 g, 0.100 mmol, 10 mol%) and anhydrous  $\text{Na}_2\text{SO}_4$  (1.00 g, pre-dried under vacuum with a heat gun) in  $\text{CH}_3\text{NO}_2$  (5.00 mL, 0.200 M) was added **4c** (0.148 g, 1.00

mmol) at 30 °C using a thermostated bath under a nitrogen atmosphere. The reaction progress was monitored by TLC analysis. Upon completion, the mixture was filtered through a tightly packed celite plug and washed thoroughly with diethyl ether. The combined filtrates were washed with water (2 x 5 mL) and brine (1 x 5 mL), dried over anhydrous MgSO<sub>4</sub>, and concentrated under reduced pressure. The crude product was purified by flash column chromatography on silica gel (E. Merck Art. 9385, eluent: hexane–Et<sub>2</sub>O = 10:1) to afford product **5c** (0.140 g, 0.958 mmol, 96% yield) in analytically pure form.

**3,4-Dihydronaphthalen-1(2H)-one (5c):** This compound is commercially available. The spectral and physical data were consistent with those of an authentic sample. Light yellow oil; **TLC**,  $R_f$  = 0.27 (hexane–EtOAc = 4:1); **<sup>1</sup>H NMR** (CD<sub>3</sub>CN, 400 MHz)  $\delta$  2.10 (quin,  $J$  = 6.3 Hz, 2H), 2.60 (t,  $J$  = 6.6 Hz, 2H), 2.97 (t,  $J$  = 6.2 Hz, 2H), 7.30–7.34 (m, 2H), 7.51 (dt,  $J$  = 1.4, 7.3 Hz, 1H), 7.91–7.94 (m, 1H); **<sup>13</sup>C NMR** (CDCl<sub>3</sub>, 100 MHz)  $\delta$  23.1, 29.5, 38.9, 126.4, 126.9, 128.6, 132.4, 133.2, 144.3, 198.1.

#### Current Method (Method C):

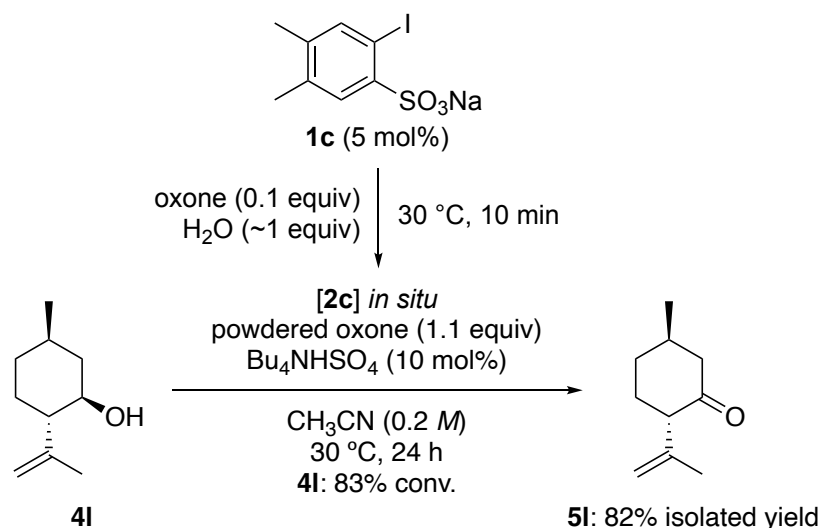

A mixture of **1c** (as 1.5 hydrate, 0.0173 g, 0.0500 mmol, 5 mol%), oxone (0.0307 g, 0.100 mmol), and H<sub>2</sub>O (ca. 20  $\mu$ L) was stirred at 30 °C for 10 min. To this stirring mixture were added powdered oxone (0.338 g, 0.110 mmol), Bu<sub>4</sub>NHSO<sub>4</sub> (0.0340 g, 0.100 mmol, 10 mol%), CH<sub>3</sub>CN (10.0 mL, 0.100 M), and **4I** (0.154 g, 1.00 mmol) at 30 °C using a thermostated bath under a nitrogen atmosphere. The reaction progress was monitored by TLC analysis. Upon completion, the mixture was filtered through a tightly packed celite plug and washed with diethyl ether. The combined organic layers were washed with water (2 x 5 mL) and brine (1 x 5 mL), dried over anhydrous MgSO<sub>4</sub>, and concentrated under reduced pressure. The crude products were purified by flash column chromatography on silica gel (E. Merck Art. 9385, eluent: hexane–Et<sub>2</sub>O = 20:1) to afford **5I** (0.125 g, 0.818 mmol, 82% yield) in analytically pure form.

*cf.* Method A [**1a** (5 mol%)], 12 h: **4I**, 92% conv.; **5I**, 6% NMR yield (multiple unidentified byproducts

were observed).

**(2*S*,5*R*)-5-Methyl-2-(prop-1-en-2-yl)cyclohexan-1-one (5l):** This compound is commercially available. The spectral and physical data were consistent with those of an authentic sample. Colorless oil; **TLC**,  $R_f = 0.40$  (hexane–EtOAc = 4:1); **<sup>1</sup>H NMR** (CDCl<sub>3</sub>, 400 MHz)  $\delta$  1.04 (d,  $J = 6.4$  Hz, 3H), 1.38–1.48 (m, 1H), 1.74–1.85 (m, 1H), 1.75 (s, 3H), 1.86–1.96 (m, 2H), 2.02–2.09 (m, 2H), 2.41 (ddd,  $J = 2.0, 3.7, 13.3$  Hz, 1H), 2.96 (dd,  $J = 5.5, 12.8$  Hz, 1H), 4.72 (t,  $J = 0.92$  Hz, 1H), 4.94 (t,  $J = 1.4$  Hz, 1H); **<sup>13</sup>C NMR** (CDCl<sub>3</sub>, 100 MHz)  $\delta$  21.2, 22.2, 31.0, 33.7, 35.2, 50.4, 57.5, 112.6, 143.3, 210.0.

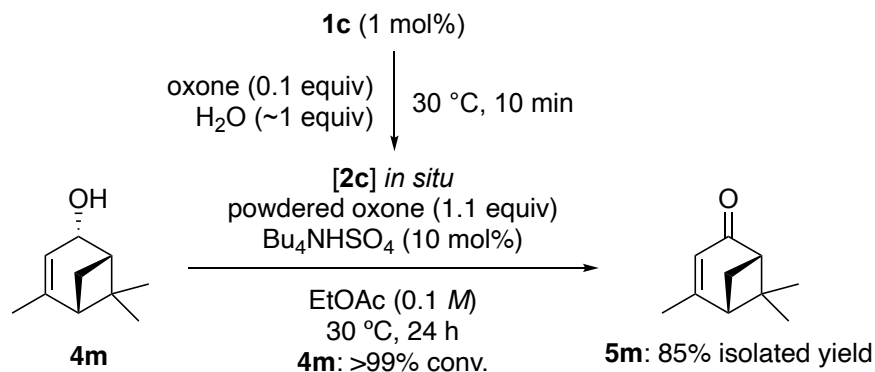

*cf.* Method A [**1a** (1 mol%), EtOAc], 6 h: **4m**, >99% conv.; **5m**, 10% NMR yield (multiple unidentified byproducts were observed).

**(1*S*,5*S*)-4,6,6-Trimethylbicyclo[3.1.1]hept-3-en-2-one (5m):** Method C, 85% yield (0.127 g, 0.847 mmol). This compound is commercially available. The spectral and physical data were consistent with those of an authentic sample. This compound was purified by flash column chromatography on silica gel (E. Merck Art. 9385, eluent: hexane–Et<sub>2</sub>O = 20:1). Pale yellow oil; **TLC**,  $R_f = 0.40$  (hexane–EtOAc = 4:1); **<sup>1</sup>H NMR** (CDCl<sub>3</sub>, 400 MHz)  $\delta$  1.01 (s, 3H), 1.50 (s, 3H), 2.02 (d,  $J = 1.4$  Hz, 3H), 2.08 (d,  $J = 9.2$  Hz, 1H), 2.40–2.43 (m, 1H), 2.63–2.67 (m, 1H), 2.81 (td,  $J = 4.6, 11.0$  Hz, 1H), 5.73 (s, 1H); **<sup>13</sup>C NMR** (CDCl<sub>3</sub>, 100 MHz)  $\delta$  21.8, 23.3, 26.3, 40.6, 49.4, 53.7, 57.3, 120.9, 170.0, 203.6.

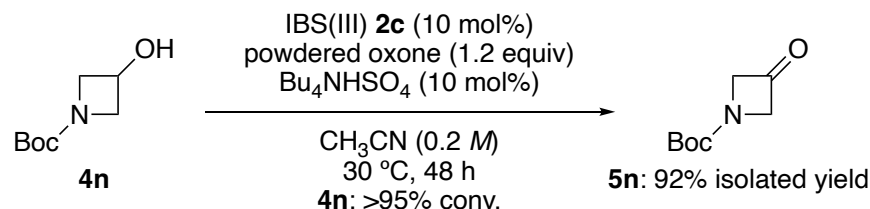

*cf.* Method A [**1a** (10 mol%)], 12 h: **4n**, >95% conv.; **5n**, 10% NMR yield (multiple unidentified byproducts were observed).

***tert*-Butyl 3-oxoazetidine-1-carboxylate (5n):** Method B, 92% yield (0.158 g, 0.920 mmol). This compound is commercially available. The spectral and physical data were consistent with those of an authentic sample. This compound was purified by flash column chromatography on silica gel (E. Merck Art. 9385, eluent: hexane–Et<sub>2</sub>O = 10:1). Yellow solid; **TLC**,  $R_f = 0.57$  (hexane–EtOAc = 2:1);



$^1\text{H}$  NMR ( $\text{CDCl}_3$ , 400 MHz)  $\delta$  1.49 (s, 9H), 4.69 (s, 4H);  $^{13}\text{C}$  NMR ( $\text{CDCl}_3$ , 100 MHz)  $\delta$  28.2, 70.9, 80.9, 155.9, 196.6.

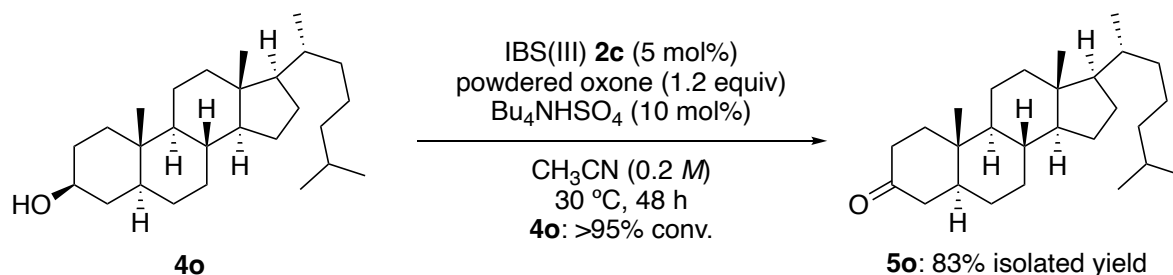

cf. Method A [ $\mathbf{1a}$  (5 mol%)], 60 h:  $\mathbf{4o}$ , 11% conv.;  $\mathbf{5o}$ , <10% NMR yield (unreacted  $\mathbf{4o}$  was recovered).  
**(5*S*,8*R*,9*S*,10*S*,13*R*,14*S*,17*R*)-10,13-Dimethyl-17-((*R*)-6-methylheptan-2-yl)hexadecahydro-3*H*-cyclopenta[*a*]phenanthren-3-one ( $\mathbf{5o}$ )**: Method B, 83% yield (0.320 g, 0.827 mmol). This compound is commercially available. The spectral and physical data were consistent with those of an authentic sample. This compound was purified by flash column chromatography on silica gel (E. Merck Art. 9385, eluent: hexane– $\text{Et}_2\text{O}$  = 20:1). Yellow solid; TLC,  $R_f$  = 0.23 (hexane– $\text{EtOAc}$  = 10:1);  $^1\text{H}$  NMR ( $\text{CDCl}_3$ , 400 MHz)  $\delta$  0.68 (s, 3H), 0.85 (d,  $J$  = 1.8 Hz, 3H), 0.87 (d,  $J$  = 1.8 Hz, 3H), 0.90 (d,  $J$  = 6.4 Hz, 3H), 0.95–1.41 (m, 22H), 1.49–1.60 (m, 4H), 1.67–1.71 (m, 1H), 1.77–1.85 (m, 1H), 1.97–2.10 (m, 3H), 2.23–2.43 (m, 3H);  $^{13}\text{C}$  NMR ( $\text{CDCl}_3$ , 100 MHz)  $\delta$  11.4, 12.0, 18.6, 21.4, 22.5, 22.8, 23.8, 24.2, 28.0, 28.2, 28.9, 31.7, 35.3, 35.6, 35.7, 36.1, 38.2, 38.5, 39.5, 39.8, 42.5, 44.7, 46.7, 53.7, 56.20, 56.22, 212.2.

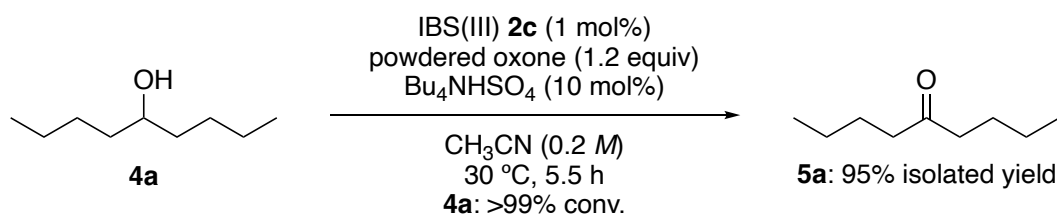

**Nonan-5-one ( $\mathbf{5a}$ )**: Method B, 95% yield (0.137 g, 0.952 mmol). This compound is commercially available. The spectral and physical data were consistent with those of an authentic sample. This compound was purified by flash column chromatography on silica gel (E. Merck Art. 9385, eluent: hexane– $\text{Et}_2\text{O}$  = 20:1). Colorless oil; TLC,  $R_f$  = 0.55 (hexane– $\text{EtOAc}$  = 4:1);  $^1\text{H}$  NMR ( $\text{CDCl}_3$ , 400 MHz)  $\delta$  0.90 (t,  $J$  = 7.3 Hz, 6H), 1.31 (sext,  $J$  = 7.4 Hz, 4H), 1.55 (quin,  $J$  = 7.5 Hz, 4H), 2.40 (t,  $J$  = 7.6 Hz, 4H);  $^{13}\text{C}$  NMR ( $\text{CDCl}_3$ , 100 MHz)  $\delta$  13.8, 22.3, 25.9, 42.4, 211.7.

## Procedures for Oxidative Lactonization

### Previous Method (Method A):

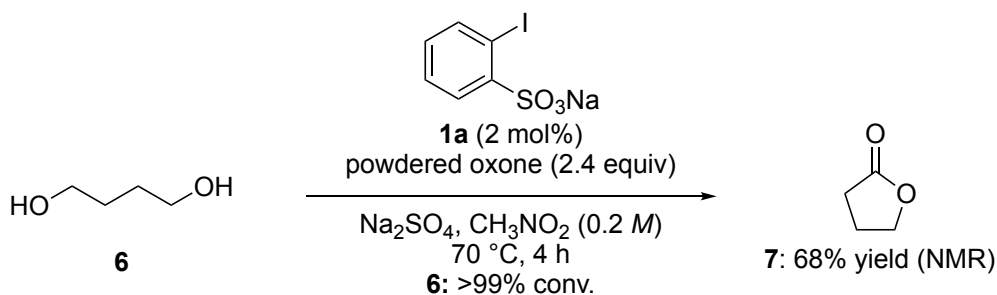

To a rigorously stirring mixture of powdered oxone (0.738 g, 2.40 mmol, 2.4 equiv), **1a** (as a monohydrate, 0.00650 g, 0.0200 mmol, 2 mol%), biphenyl (0.0771 g, 0.500 mmol, as an internal standard) and anhydrous  $\text{Na}_2\text{SO}_4$  (1.00 g, pre-dried under vacuum with a heat gun) in  $\text{CH}_3\text{NO}_2$  (5.00 mL, 0.200 M) was added **6** (0.0901 g, 1.00 mmol) at room temperature under a nitrogen atmosphere. The reaction mixture was then heated to  $70\text{ }^\circ\text{C}$  and monitored by TLC and  $^1\text{H}$  NMR analysis. Upon completion, the mixture was cooled to room temperature, filtered through a tightly packed celite plug, and washed thoroughly with diethyl ether. The combined filtrates were washed with water (2 x 5 mL) and brine (1 x 5 mL), dried over anhydrous  $\text{MgSO}_4$ , and concentrated under reduced pressure. The yield of lactone **7** was determined to be 68% by  $^1\text{H}$  NMR analysis of the crude using biphenyl as a calibrated internal standard.

### Current Method (Method C):

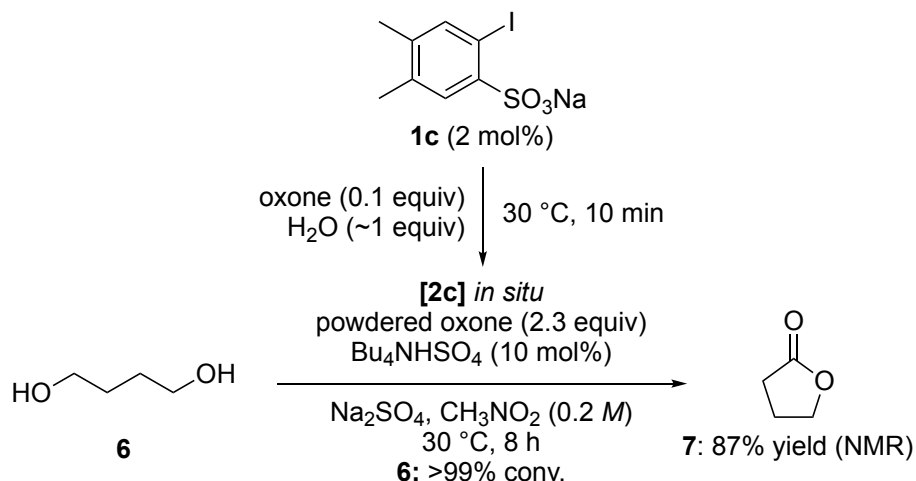

A mixture of **1c** (as 1.5 hydrate, 0.00720 g, 0.0200 mmol, 2 mol%), oxone (0.0307 g, 0.100 mmol), and  $\text{H}_2\text{O}$  (ca. 20  $\mu\text{L}$ ) was stirred at  $30\text{ }^\circ\text{C}$  for 10 min. To this stirring mixture were added powdered oxone (0.707 g, 2.30 mmol),  $\text{Bu}_4\text{NH}_4\text{SO}_4$  (0.0340 g, 0.100 mmol, 10 mol%), anhydrous  $\text{Na}_2\text{SO}_4$  (1.00 g, pre-dried under vacuum with a heat gun),  $\text{CH}_3\text{NO}_2$  (5.00 mL, 0.200 M), and **6** (0.0901 g, 1.00 mmol) at  $30\text{ }^\circ\text{C}$  using a thermostated bath under a nitrogen atmosphere. The reaction progress was monitored by TLC analysis. Upon completion, the mixture was filtered through a tightly packed

celite plug and washed with diethyl ether. The combined organic layers were washed with water (2 x 5 mL) and brine (1 x 5 mL), dried over anhydrous MgSO<sub>4</sub>, and concentrated under reduced pressure. The yield of the **7** was determined to be 87% by <sup>1</sup>H NMR analysis of the crude using biphenyl as a calibrated internal standard.

**Dihydrofuran-2(3*H*)-one (**7**):** This compound is commercially available. The spectral and physical data were consistent with those of an authentic sample. Colorless oil; **TLC**, *R*<sub>f</sub> = 0.63 (hexane–EtOAc = 4:1); <sup>1</sup>H NMR (CDCl<sub>3</sub>, 400 MHz) δ 2.27 (quin, *J* = 7.7 Hz, 2H), 2.50 (t, *J* = 8.0 Hz, 2H), 4.36 (t, *J* = 7.1 Hz, 2H); <sup>13</sup>C NMR (CDCl<sub>3</sub>, 100 MHz) δ 21.8, 27.4, 68.2, 177.6.

### Representative Procedure for Oxidative Esterification (Method C)

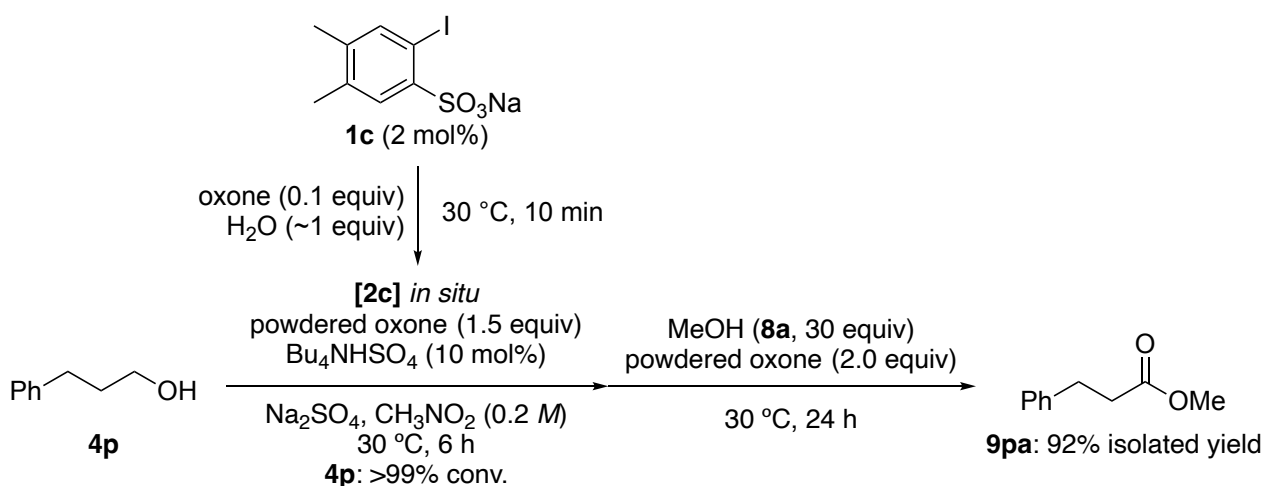

A mixture of **1c** (as 1.5 hydrate, 0.00722 g, 0.0200 mmol, 2 mol%), oxone (0.0307 g, 0.100 mmol, 0.1 equiv.), and H<sub>2</sub>O (ca. 20 μL) was stirred at 30 °C for 10 min. To this stirred mixture were added powdered oxone (0.461 g, 1.50 mmol, 1.5 equiv.), Bu<sub>4</sub>NHSO<sub>4</sub> (0.0340 g, 0.100 mmol, 10 mol%), anhydrous Na<sub>2</sub>SO<sub>4</sub> (1.00 g, pre-dried under vacuum with a heat gun), CH<sub>3</sub>NO<sub>2</sub> (5.00 mL, 0.200 M), and **4p** (1.00 mmol) were added at 30 °C under nitrogen. The reaction progress was monitored by TLC or <sup>1</sup>H NMR analysis. After complete consumption of **4p** and formation of aldehyde **5p**, to the resulting mixture were added powdered oxone (0.615 g, 2.00 mmol) and methanol (**8a**, 0.961 g, 30.0 mmol, 30.0 equiv.) at 30 °C under a nitrogen atmosphere. The reaction was again monitored by TLC or <sup>1</sup>H NMR analysis. Upon completion, the reaction mixture was filtered through a plug of tightly packed celite, which was then thoroughly washed with diethyl ether. The combined filtrates were washed successively with water (2 x 5 mL) and brine (1 x 5 mL), dried over anhydrous MgSO<sub>4</sub>, and concentrated under reduced pressure. The crude products were purified by flash column chromatography on silica gel (E. Merck Art. 9385, eluent: hexane–Et<sub>2</sub>O = 20:1) to yield **7pa** (0.151 g, 0.922 mmol, 92% yield) in analytically pure form.

**Methyl 3-phenylpropanoate (**7pa**):** This compound is commercially available. The spectral and physical data were consistent with those of an authentic sample. Colorless oil; **TLC**, *R*<sub>f</sub> = 0.33

(hexane–EtOAc = 10:1);  $^1\text{H}$  NMR ( $\text{CDCl}_3$ , 400 MHz)  $\delta$  2.62–2.66 (m, 2H), 2.96 (t,  $J$  = 8.0 Hz, 2H), 3.67 (s, 3H), 7.19–7.22 (m, 3H), 7.27–7.31 (m, 2H);  $^{13}\text{C}$  NMR ( $\text{CDCl}_3$ , 100 MHz)  $\delta$  30.6, 35.3, 51.2, 126.0, 128.0, 128.2, 140.2, 172.9.

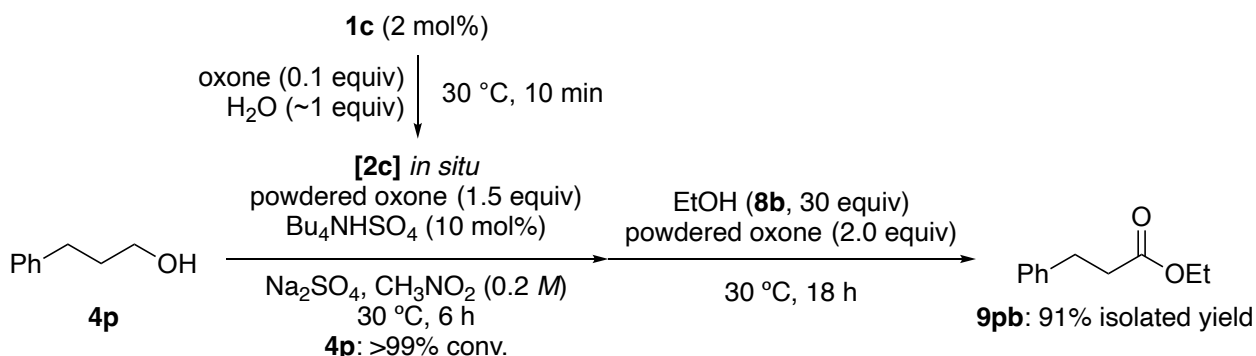

**Ethyl 3-phenylpropanoate (9pb):** Method C, 91% yield (0.162 g, 0.909 mmol). This compound is commercially available. The spectral and physical data were consistent with those of an authentic sample. This compound was purified by flash column chromatography on silica gel (E. Merck Art. 9385, eluent: hexane–Et<sub>2</sub>O = 30:1). Colorless oil; TLC,  $R_f$  = 0.40 (hexane–EtOAc = 10:1);  $^1\text{H}$  NMR ( $\text{CDCl}_3$ , 400 MHz)  $\delta$  1.23 (t,  $J$  = 7.3 Hz, 3H), 2.62 (t,  $J$  = 7.8 Hz, 2H), 2.95 (t,  $J$  = 8.0 Hz, 2H), 4.13 (q,  $J$  = 7.2 Hz, 2H), 7.18–7.21 (m, 3H), 7.26–7.31 (m, 2H);  $^{13}\text{C}$  NMR ( $\text{CDCl}_3$ , 100 MHz)  $\delta$  14.2, 30.9, 35.9, 60.4, 126.2, 128.3, 128.4, 140.5, 172.9.

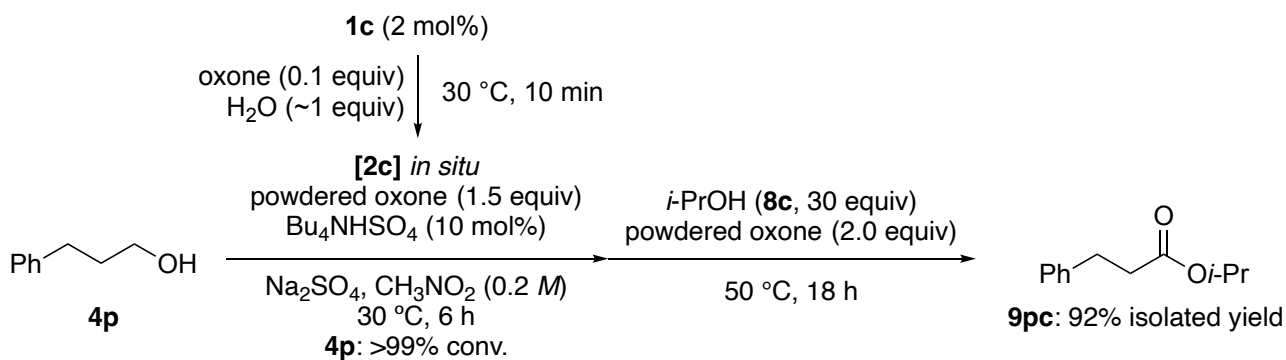

**Isopropyl 3-phenylpropanoate (9pc):** Method C, 92% yield (0.177 g, 0.920 mmol). This compound is commercially available. The spectral and physical data were consistent with those of an authentic sample. This compound was purified by flash column chromatography on silica gel (E. Merck Art. 9385, eluent: hexane–Et<sub>2</sub>O = 30:1). Pale yellow oil; TLC,  $R_f$  = 0.42 (hexane–EtOAc = 10:1);  $^1\text{H}$  NMR ( $\text{CDCl}_3$ , 400 MHz)  $\delta$  1.20 (d,  $J$  = 6.4 Hz, 6H), 2.59 (t,  $J$  = 7.8 Hz, 2H), 2.94 (t,  $J$  = 8.0 Hz, 2H), 5.00 (sept,  $J$  = 6.3 Hz, 1H), 7.18–7.22 (m, 3H), 7.27–7.30 (m, 2H);  $^{13}\text{C}$  NMR ( $\text{CDCl}_3$ , 100 MHz)  $\delta$  21.7, 30.9, 36.1, 67.5, 126.0, 128.2, 128.3, 140.4, 172.2.

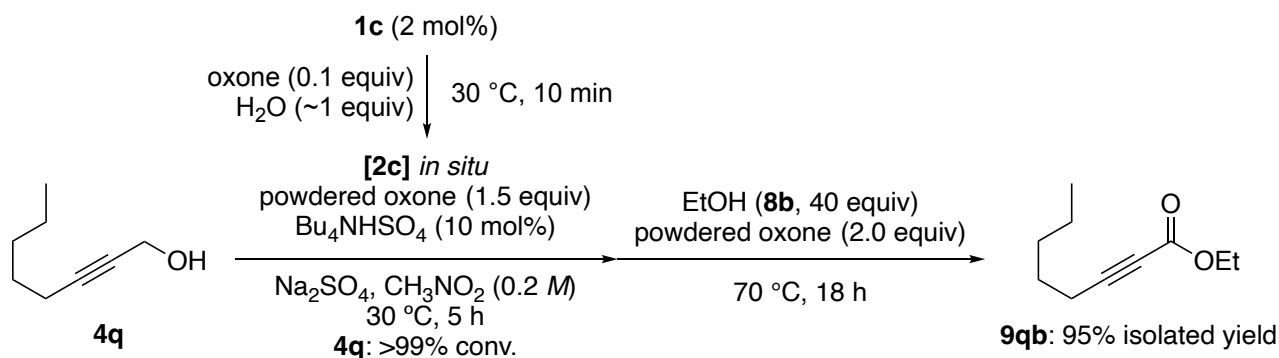

**Ethyl oct-2-ynoate (9qb):** Method C, 95% yield (0.160 g, 0.951 mmol). This compound is commercially available. The spectral and physical data were consistent with those of an authentic sample. This compound was purified by flash column chromatography on silica gel (E. Merck Art. 9385, eluent: hexane–Et<sub>2</sub>O = 30:1). Pale yellow oil; **TLC**,  $R_f$  = 0.46 (hexane–EtOAc = 10:1); **<sup>1</sup>H NMR** (CDCl<sub>3</sub>, 400 MHz)  $\delta$  0.90 (t,  $J$  = 7.3 Hz, 3H), 1.29–1.42 (m, 7H), 1.59 (quin,  $J$  = 7.3 Hz, 2H), 2.33 (t,  $J$  = 7.1 Hz, 2H), 4.22 (q,  $J$  = 7.2 Hz, 2H); **<sup>13</sup>C NMR** (CDCl<sub>3</sub>, 100 MHz)  $\delta$  13.8, 14.0, 18.6, 22.0, 27.2, 30.9, 61.7, 73.1, 89.4, 153.8.

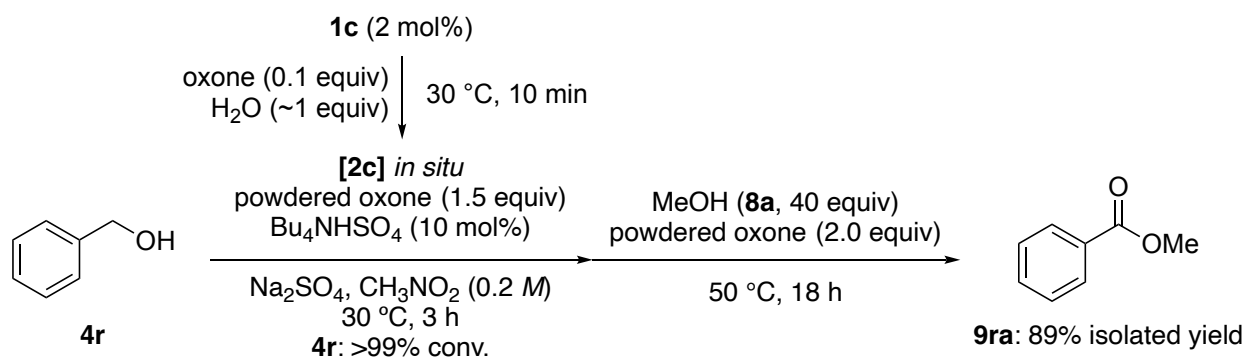

**Methyl benzoate (9ra):** Method C, 89% yield (0.122 g, 0.894 mmol). This compound is commercially available. The spectral and physical data were consistent with those of an authentic sample. This compound was purified by flash column chromatography on silica gel (E. Merck Art. 9385, eluent: hexane–Et<sub>2</sub>O = 30:1). Yellow oil; **TLC**,  $R_f$  = 0.45 (hexane–EtOAc = 10:1); **<sup>1</sup>H NMR** (CDCl<sub>3</sub>, 400 MHz)  $\delta$  3.92 (s, 3H), 7.42–7.46 (m, 2H), 7.56 (tt,  $J$  = 1.4, 7.6 Hz, 1H), 8.03–8.06 (m, 2H); **<sup>13</sup>C NMR** (CDCl<sub>3</sub>, 100 MHz)  $\delta$  51.9, 128.2, 129.4, 130.0, 132.8, 166.9.

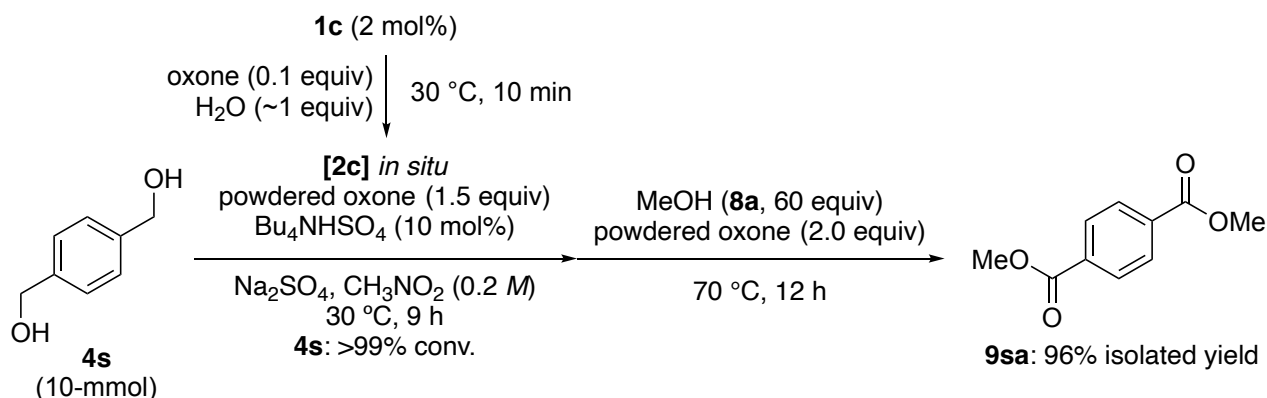

**Dimethyl terephthalate (9sa):** Method C, 96% yield (1.86 g, 9.58 mmol). This compound is commercially available. The spectral and physical data were consistent with those of an authentic sample. This compound was purified by flash column chromatography on silica gel (E. Merck Art. 9385, eluent: hexane–Et<sub>2</sub>O = 10:1). White solid; **TLC**, *R<sub>f</sub>* = 0.71 (hexane–EtOAc = 2:1); **<sup>1</sup>H NMR** (CDCl<sub>3</sub>, 400 MHz) δ 3.95 (s, 6H), 8.11 (s, 4H); **<sup>13</sup>C NMR** (CDCl<sub>3</sub>, 100 MHz) δ 52.4, 129.5, 133.8, 166.2.

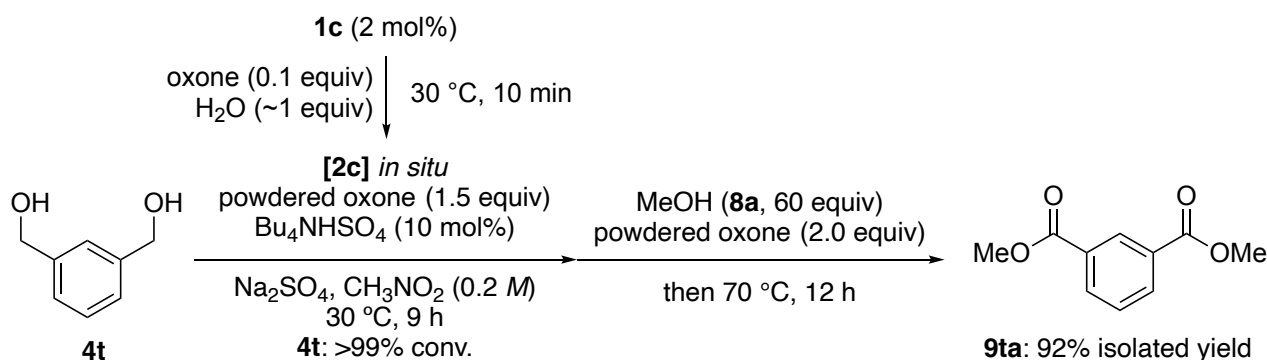

**Dimethyl isophthalate (9ta):** Method C, 92% yield (0.179 g, 0.920 mmol). This compound is commercially available. The spectral and physical data were consistent with those of an authentic sample. This compound was purified by flash column chromatography on silica gel (E. Merck Art. 9385, eluent: hexane–Et<sub>2</sub>O = 10:1). White solid; **TLC**, *R<sub>f</sub>* = 0.66 (hexane–EtOAc = 2:1); **<sup>1</sup>H NMR** (CDCl<sub>3</sub>, 400 MHz) δ 3.95 (s, 6H), 7.54 (t, *J* = 7.8 Hz, 1H), 8.24 (dd, *J* = 1.8, 7.8 Hz, 2H), 8.70 (t, *J* = 1.8 Hz, 1H); **<sup>13</sup>C NMR** (CDCl<sub>3</sub>, 100 MHz) δ 52.3, 128.6, 130.51, 130.65, 133.7, 166.2.

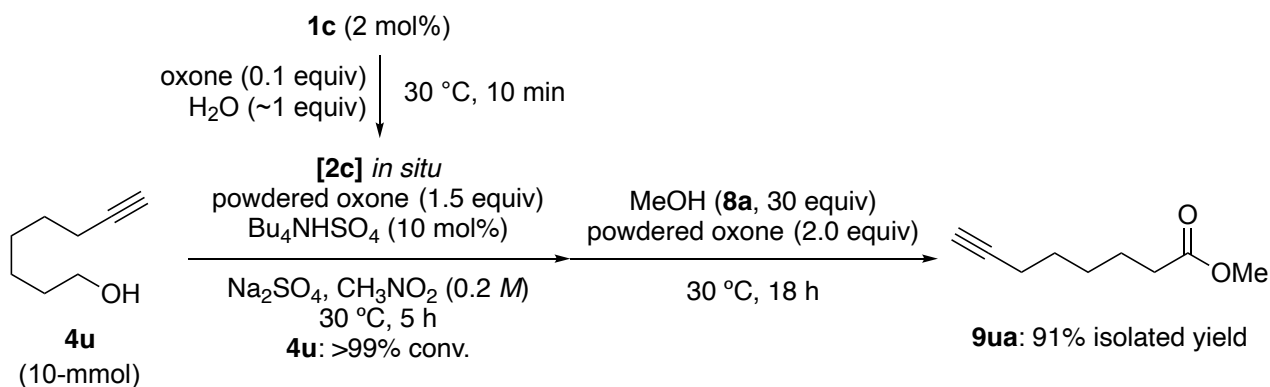

**Methyl oct-7-ynoate (9ua):** Method C, 91% yield (1.408 g, 9.13 mmol). This compound is commercially available. The spectral and physical data were consistent with those of an authentic sample. This compound was purified by flash column chromatography on silica gel (E. Merck Art. 9385, eluent: hexane–Et<sub>2</sub>O = 20:1). Colorless oil; **TLC**, *R*<sub>f</sub> = 0.29 (hexane–EtOAc = 10:1); **<sup>1</sup>H NMR** (CDCl<sub>3</sub>, 400 MHz) δ 1.40–1.48 (m, 2H), 1.55 (quin, *J* = 7.3 Hz, 2H), 1.65 (quin, *J* = 7.6 Hz, 2H), 1.95 (t, *J* = 2.8 Hz, 1H), 2.20 (dt, *J* = 2.8, 7.1 Hz, 2H), 2.33 (t, *J* = 7.6 Hz, 2H), 3.67 (s, 3H); **<sup>13</sup>C NMR** (CDCl<sub>3</sub>, 100 MHz) δ 17.8, 24.0, 27.68, 27.73, 33.4, 50.9, 68.1, 83.6, 173.3.

## References

1. (a) Uyanik, M.; Akakura, M.; Ishihara, K. *J. Am. Chem. Soc.* **2009**, *131*, 251–262. (b) Uyanik, M.; Fukatsu, R.; Ishihara, K. *Org. Lett.* **2009**, *11*, 3470–3473. (c) Uyanik, M.; Mutsuga, T.; Ishihara, K. *Angew. Chem. Int. Ed.* **2017**, *56*, 3956–3960.
2. K. Van Aken, L. Strekowski and L. Patiny, *Beilstein J. Org. Chem.*, 2006, **2**, No. 3.
3. Akaji, K.; Konno, H.; Mitsui, H.; Teruya, K.; Shimamoto, Y.; Hattori, Y.; Ozaki, T.; Kusunoki, M.; Sanjoh, A. *J. Med. Chem.* **2011**, *54*, 7962–7973.
4. Justik, M. W. *Tetrahedron Lett.* **2007**, *48*, 3003–3007.
5. Jiménez, T.; Barea, E.; Oltra, J. E.; Cuerva, J. M.; Justicia, J. *J. Org. Chem.* **2010**, *75*, 7022–7025.



**5a**,  $^1\text{H}$  NMR ( $\text{CDCl}_3$ , 400 MHz)

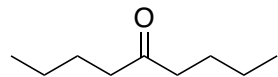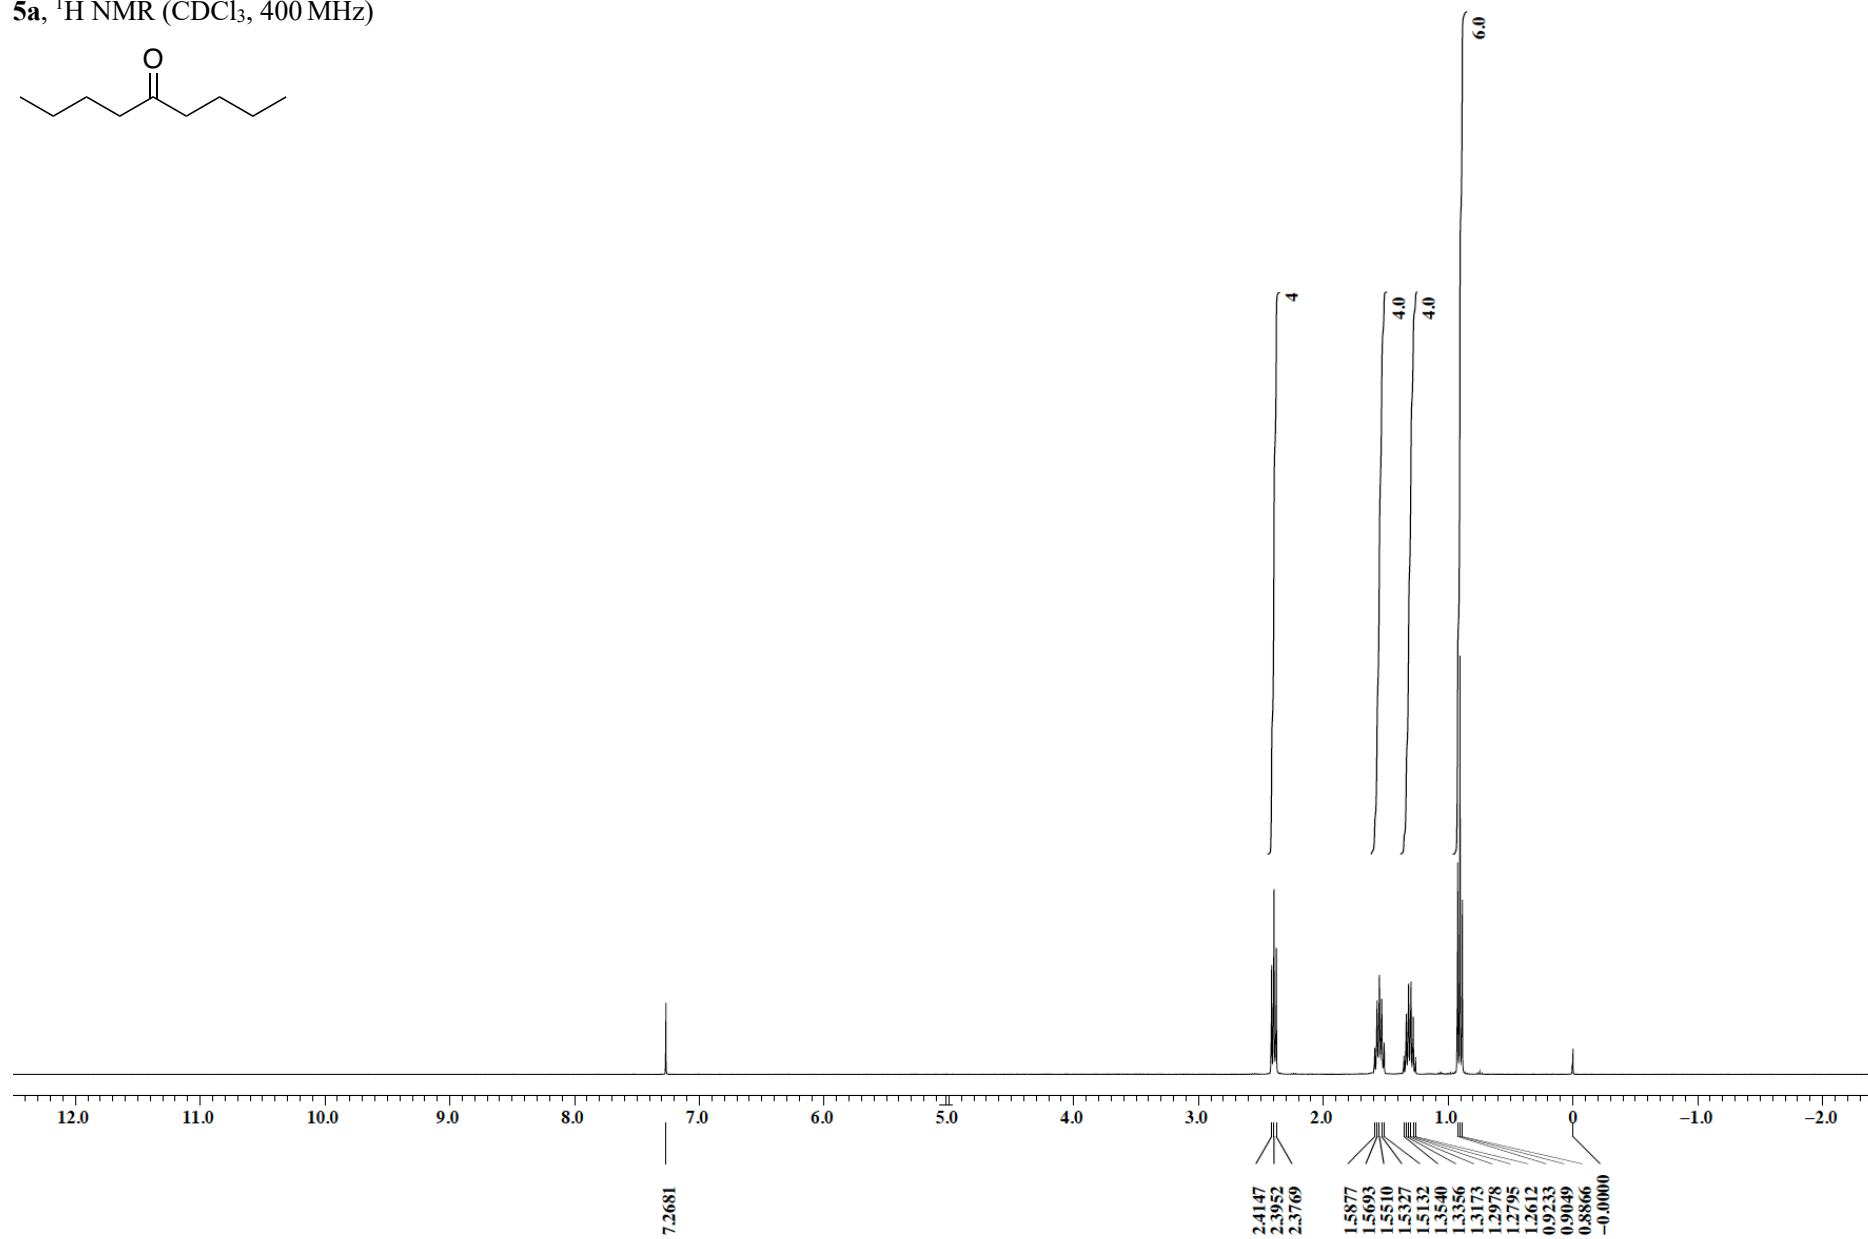

X : parts per Million : 1H

**5a**,  $^{13}\text{C}$  NMR ( $\text{CDCl}_3$ , 100 MHz)

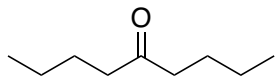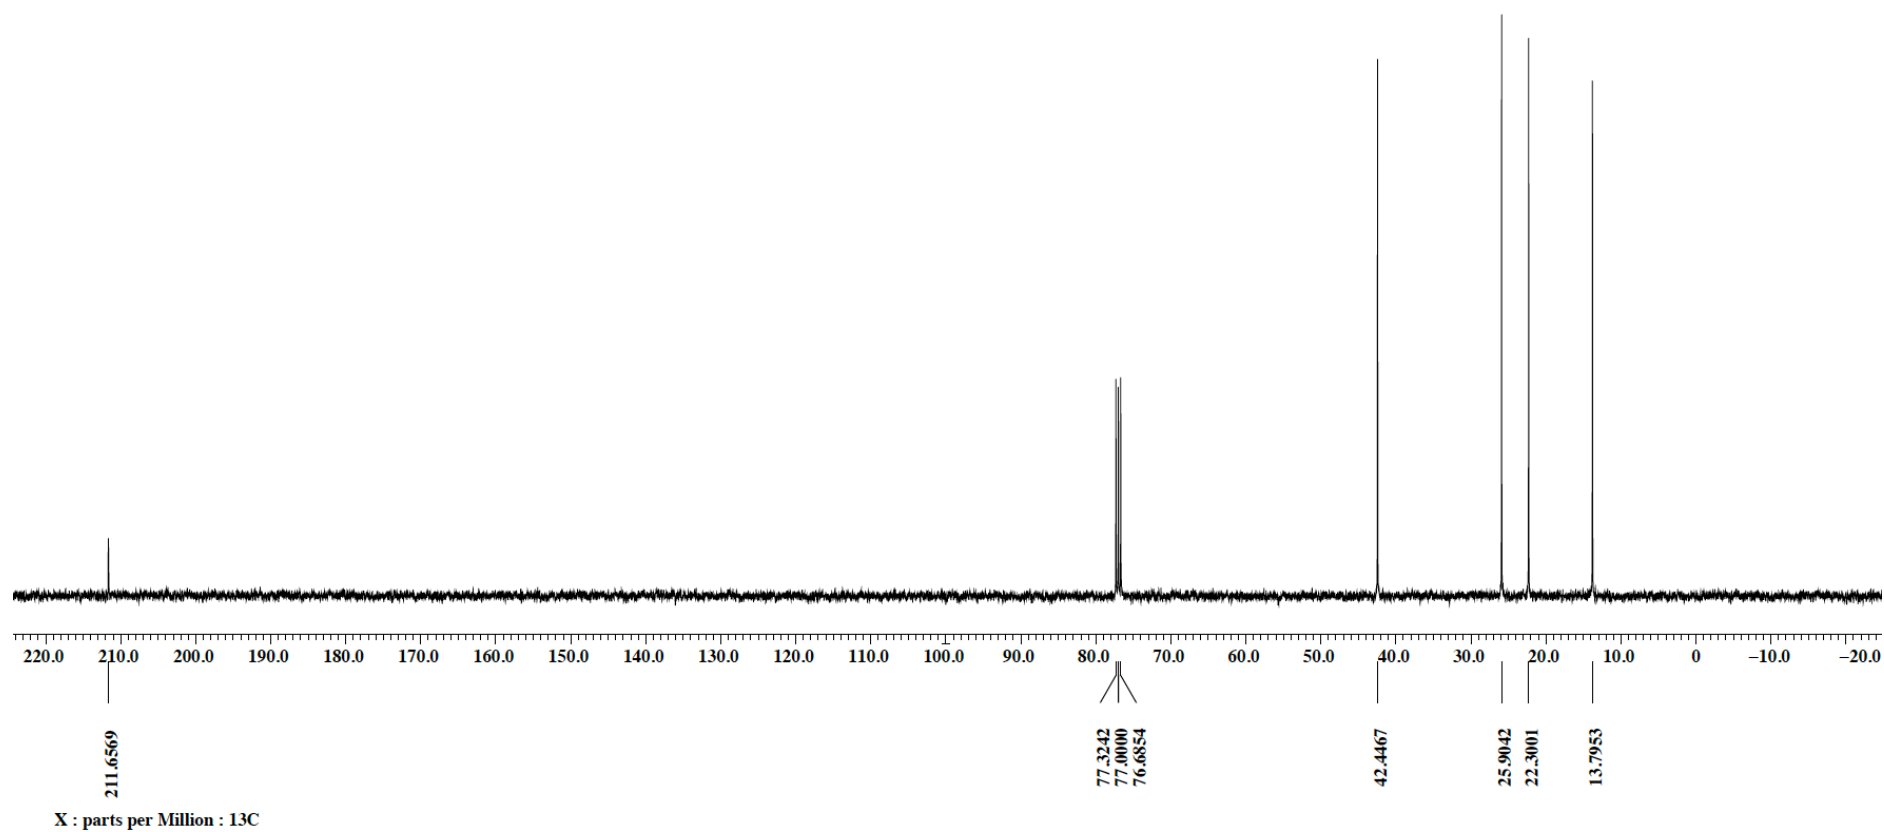

**5b**,  $^1\text{H}$  NMR ( $\text{CD}_3\text{CN}$ , 400 MHz)

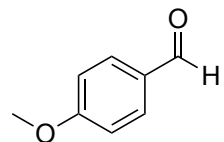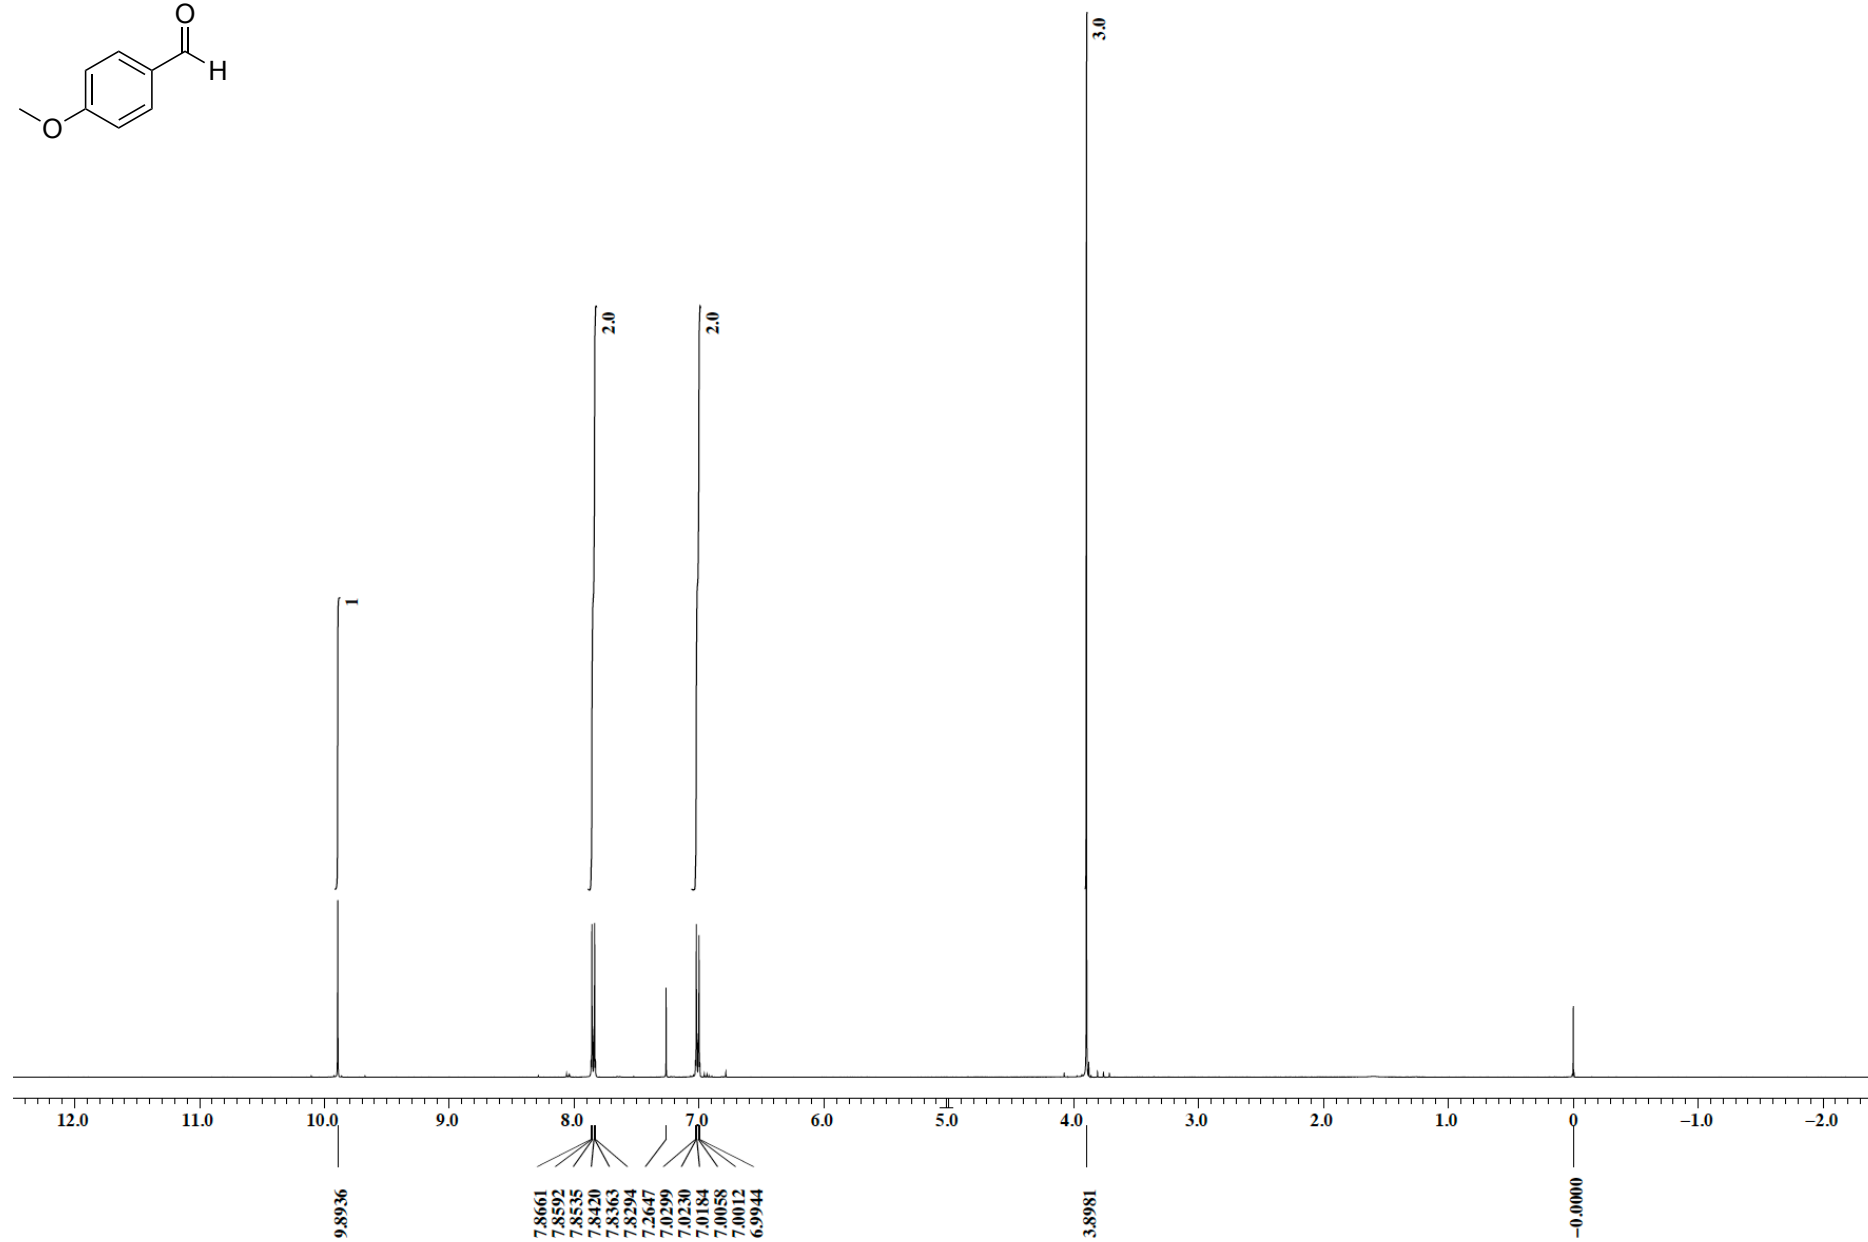

X : parts per Million : 1H

**5b**,  $^{13}\text{C}$  NMR ( $\text{CD}_3\text{CN}$ , 100 MHz)

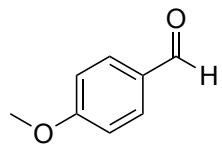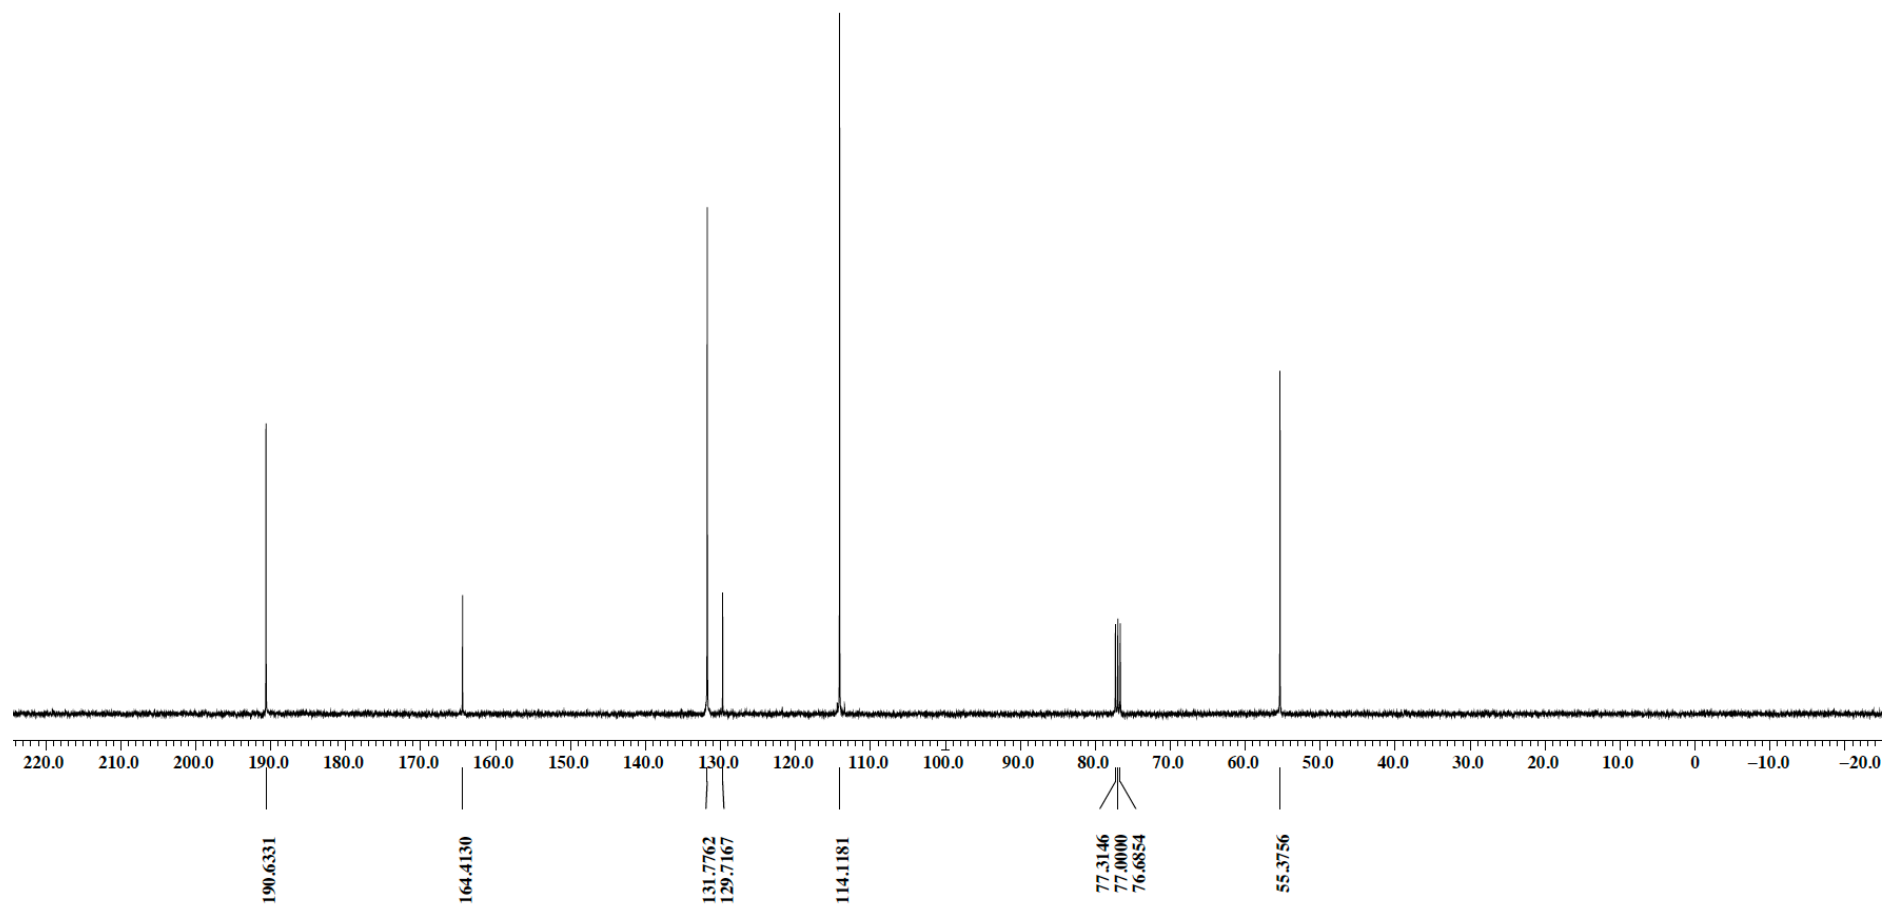

X : parts per Million :  $^{13}\text{C}$

**5c**,  $^1\text{H}$  NMR ( $\text{CD}_3\text{CN}$ , 400 MHz)

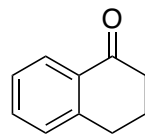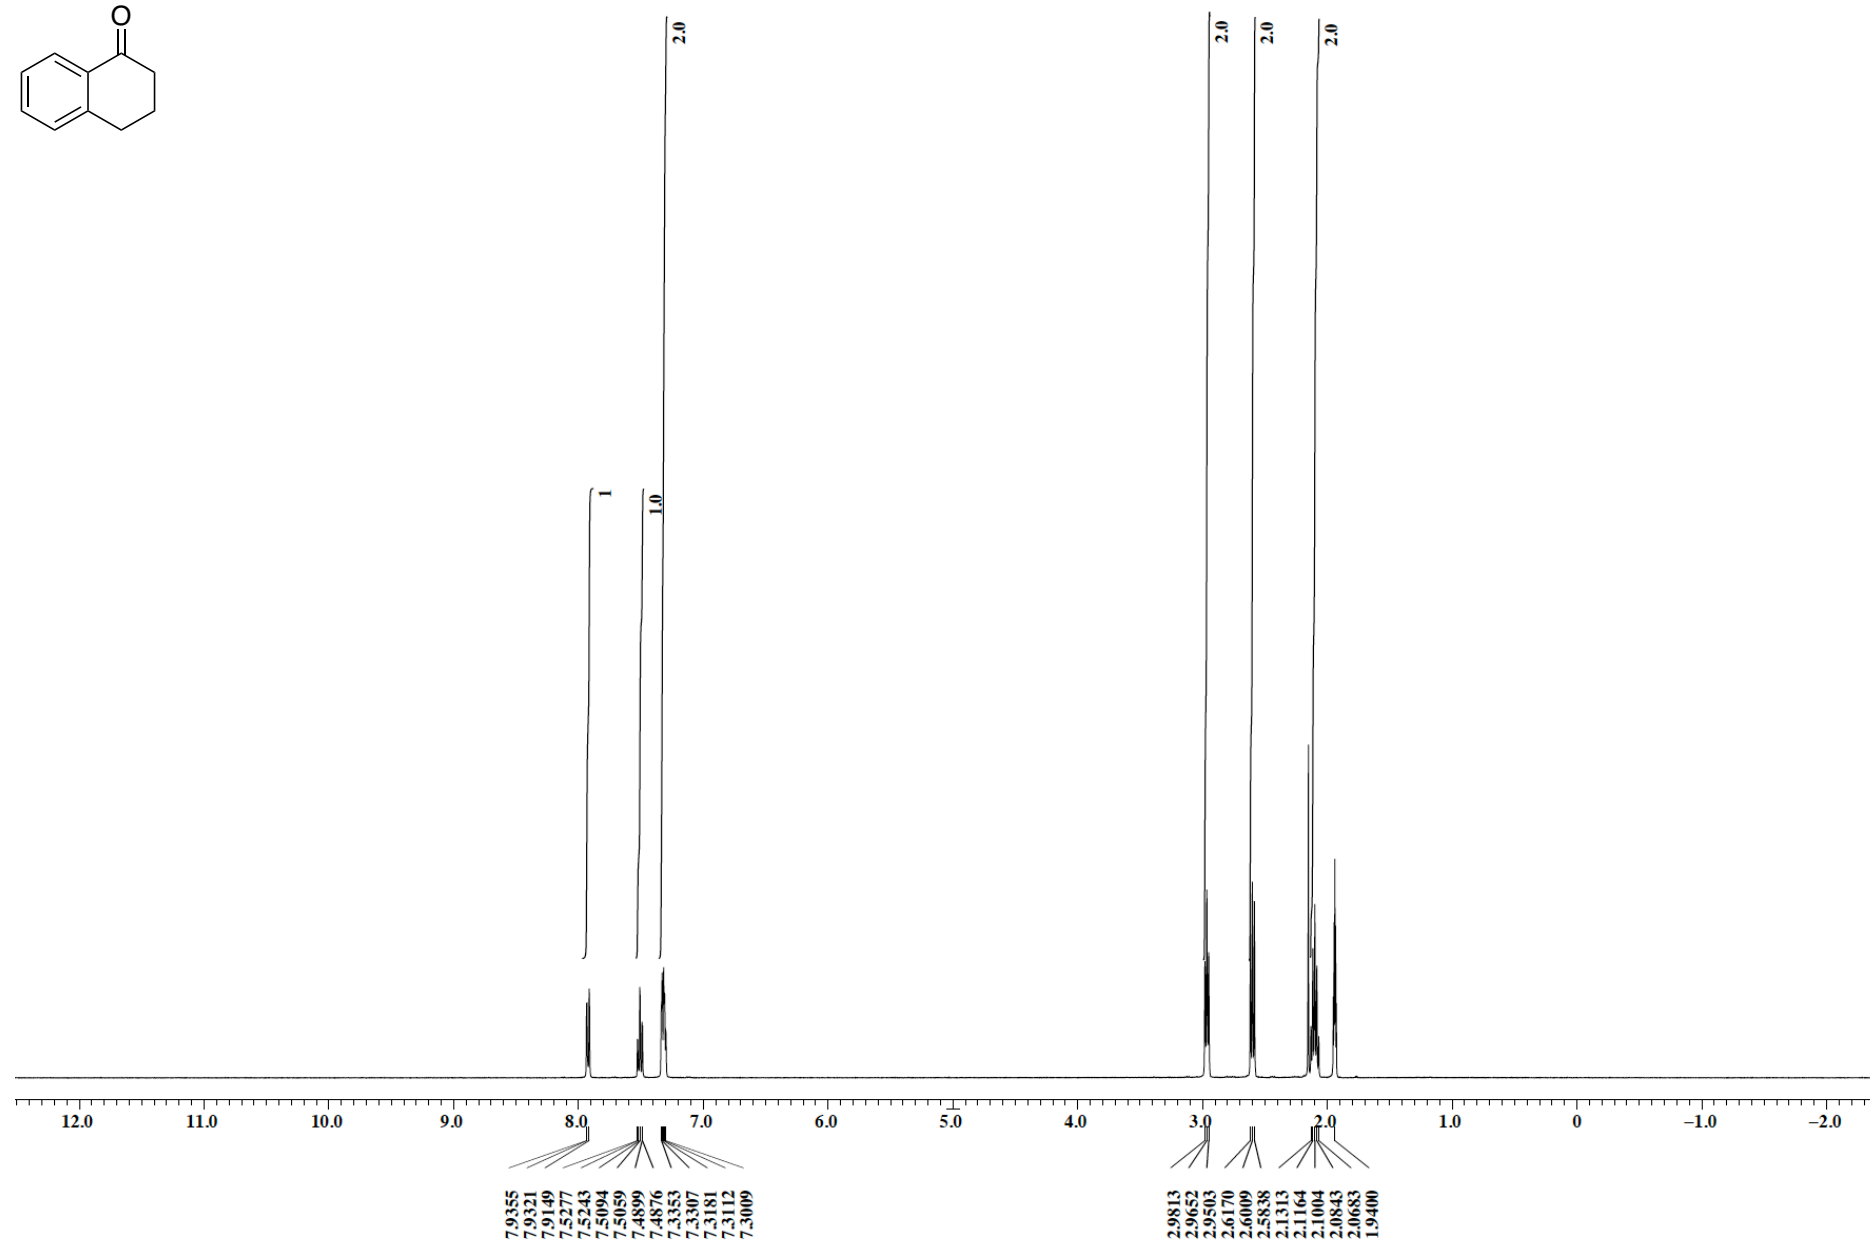

X : parts per Million :  $^1\text{H}$

**5c**,  $^{13}\text{C}$  NMR ( $\text{CDCl}_3$ , 100 MHz)

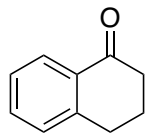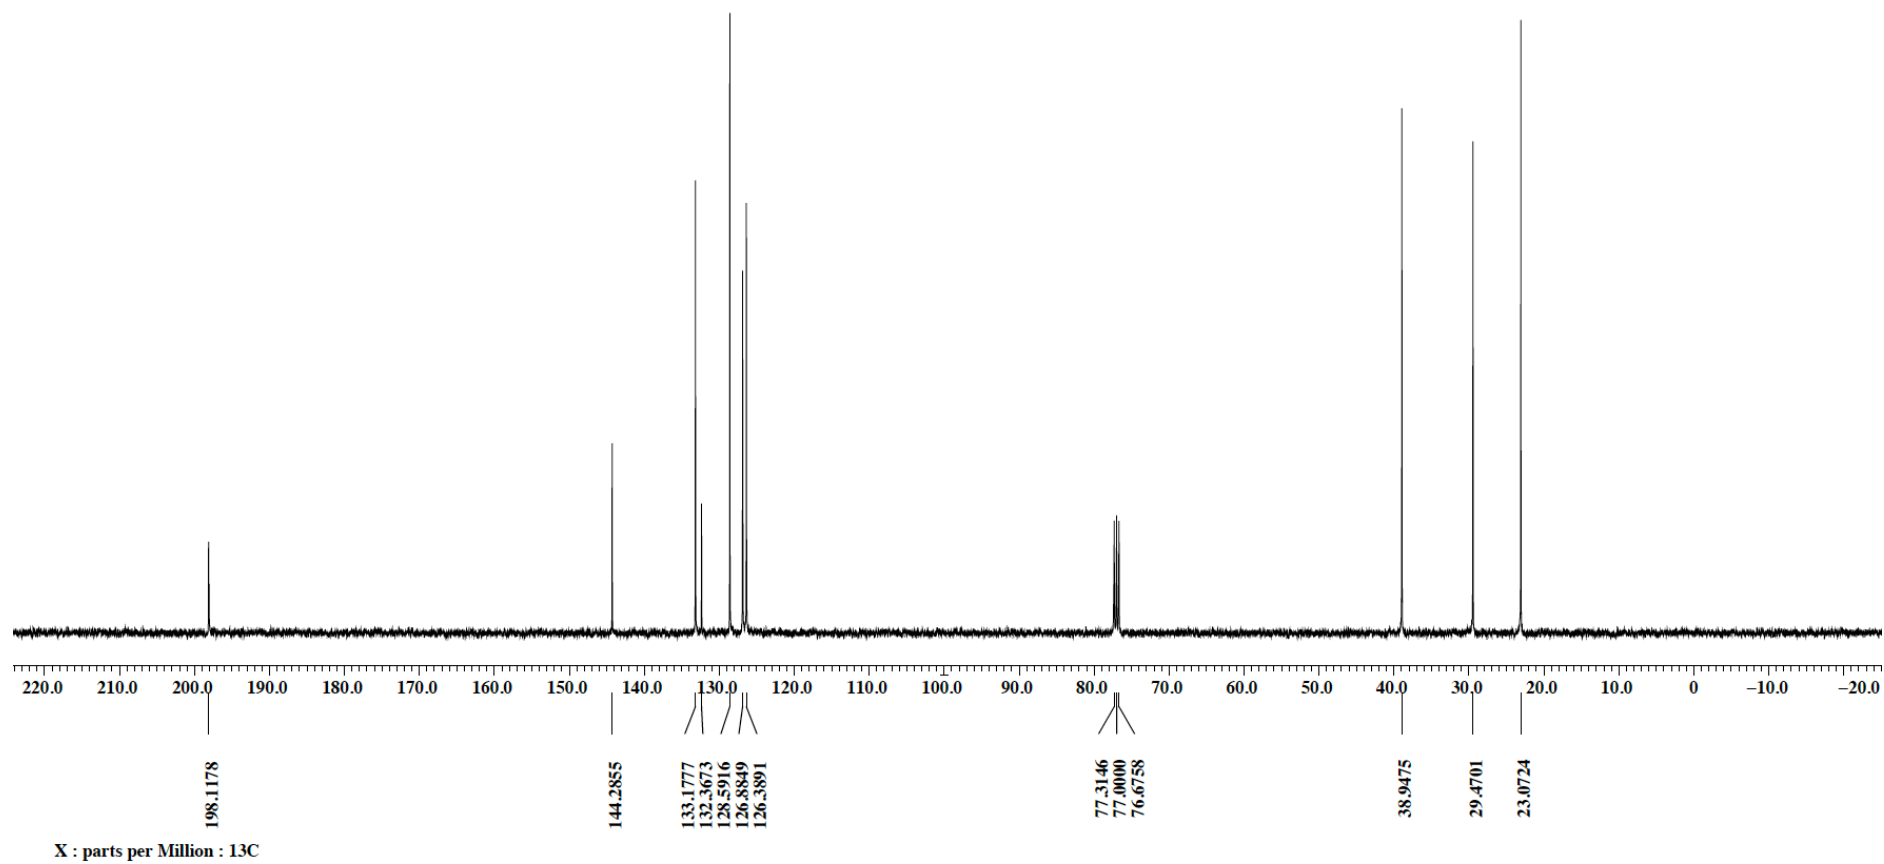

**5d**,  $^1\text{H}$  NMR ( $\text{CD}_3\text{CN}$ , 400 MHz)

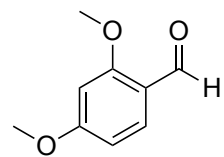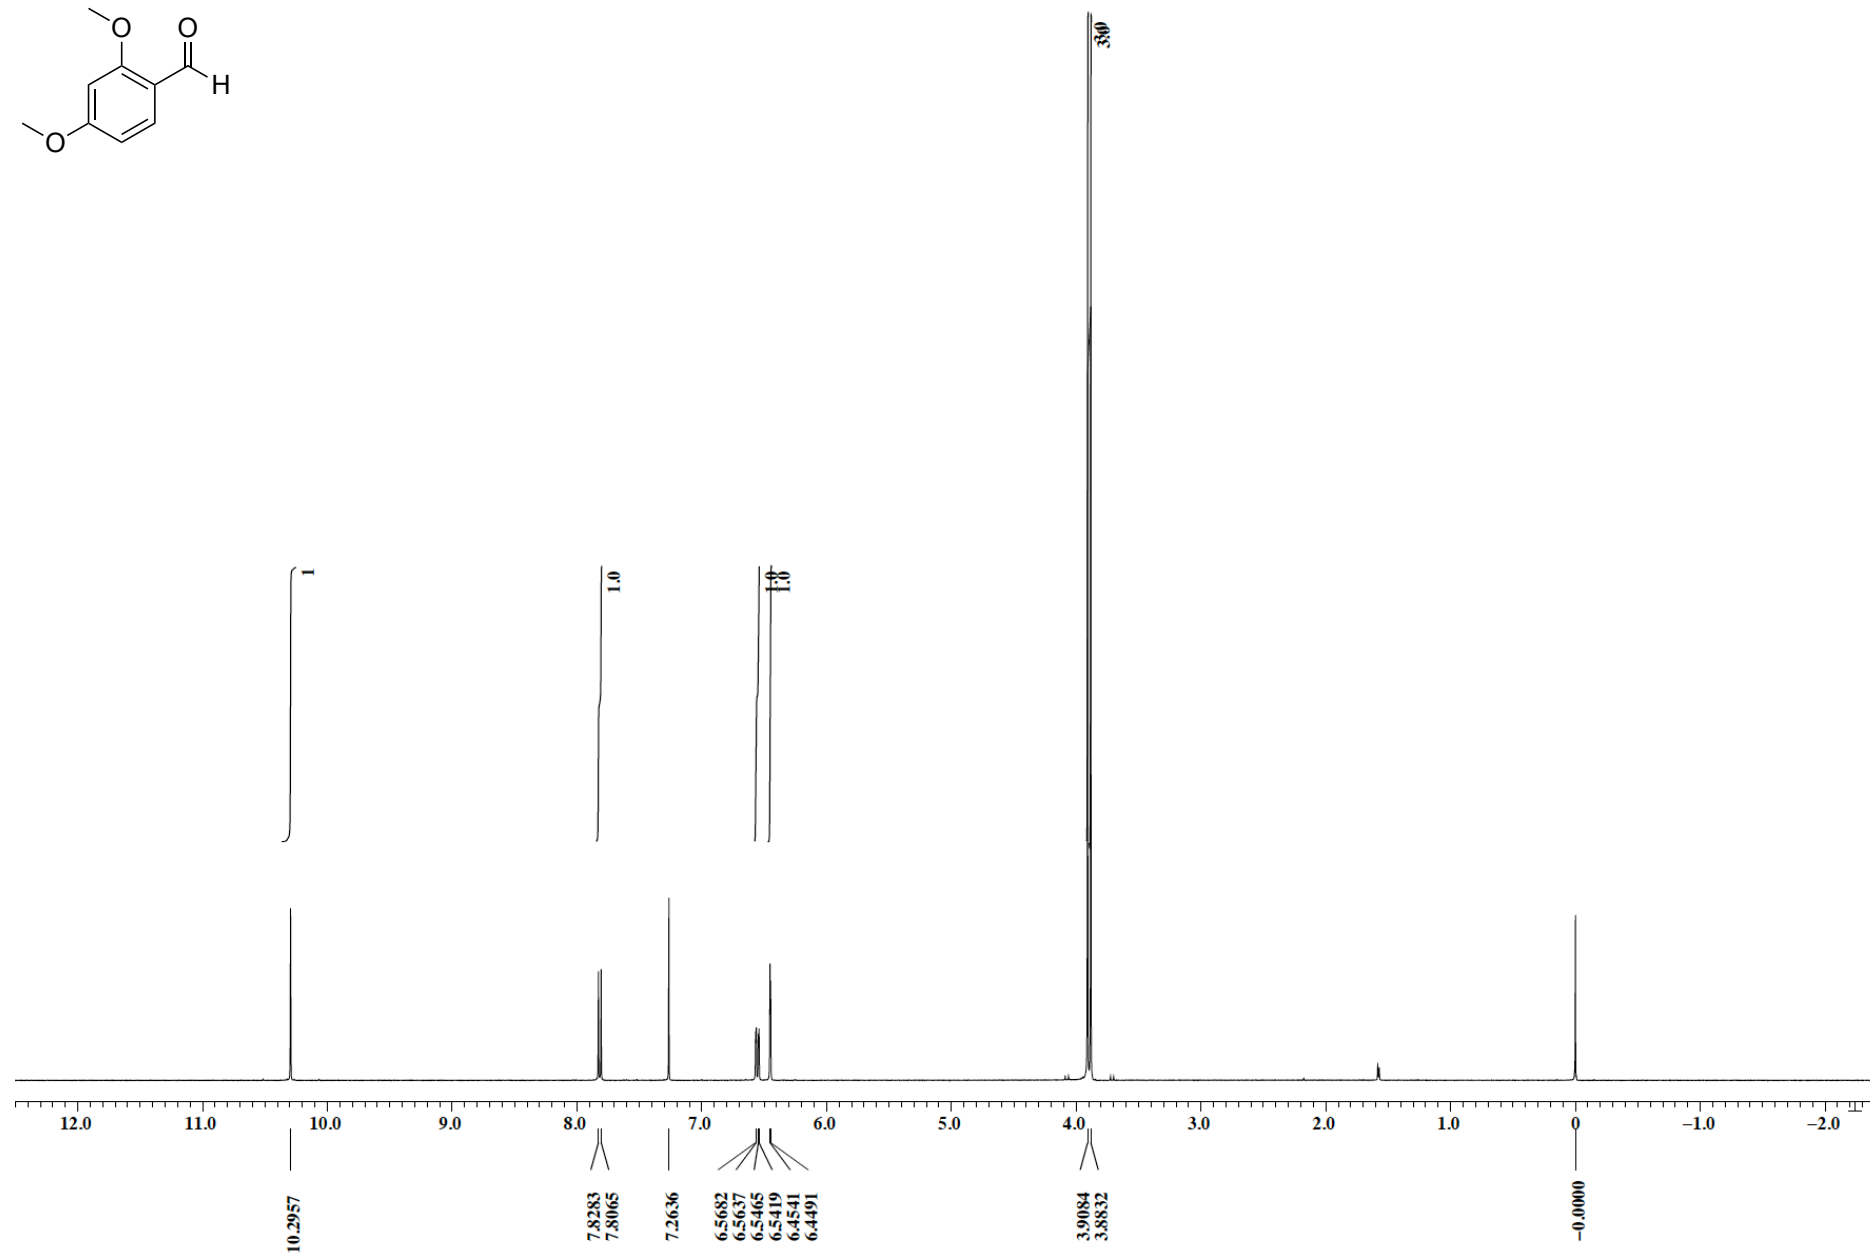

X : parts per Million :  $^1\text{H}$

**5d**,  $^{13}\text{C}$  NMR ( $\text{CD}_3\text{CN}$ , 100 MHz)

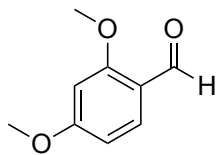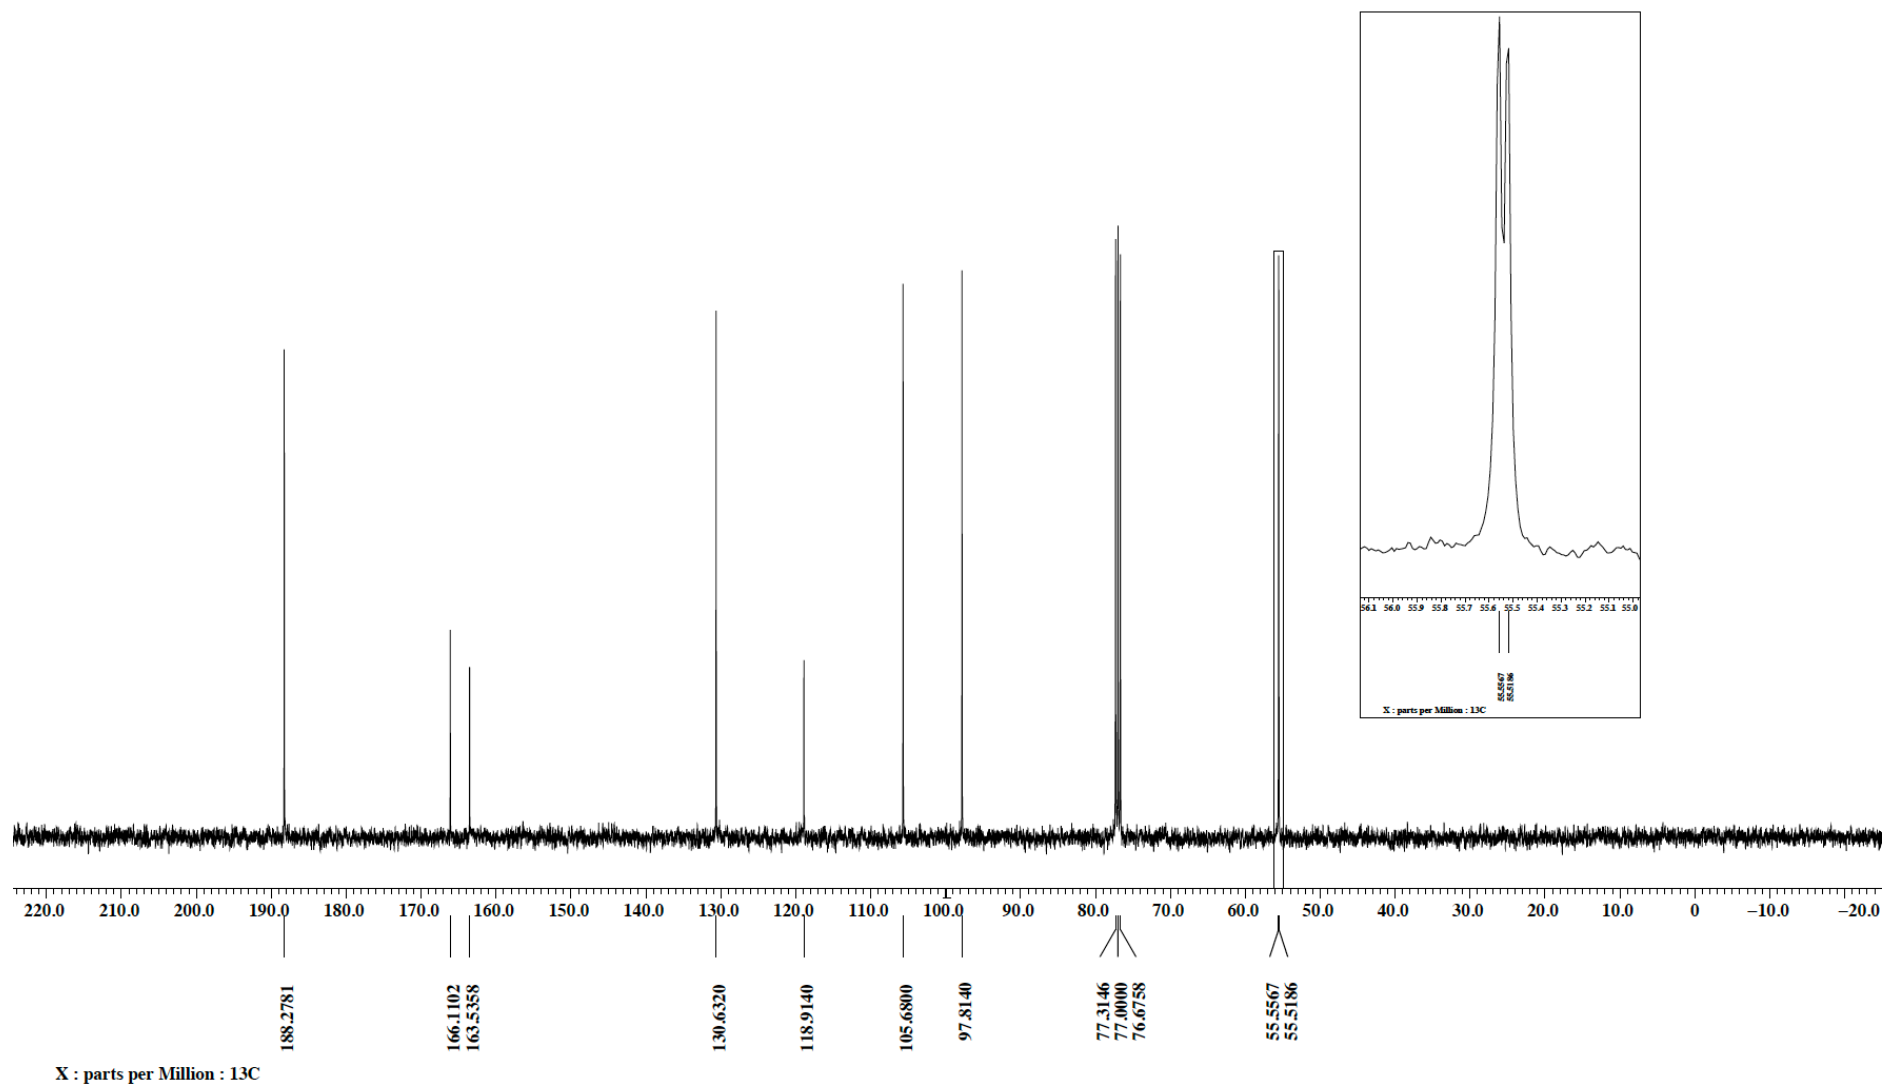



**5e**,  $^1\text{H}$  NMR ( $\text{CDCl}_3$ , 400 MHz)

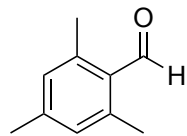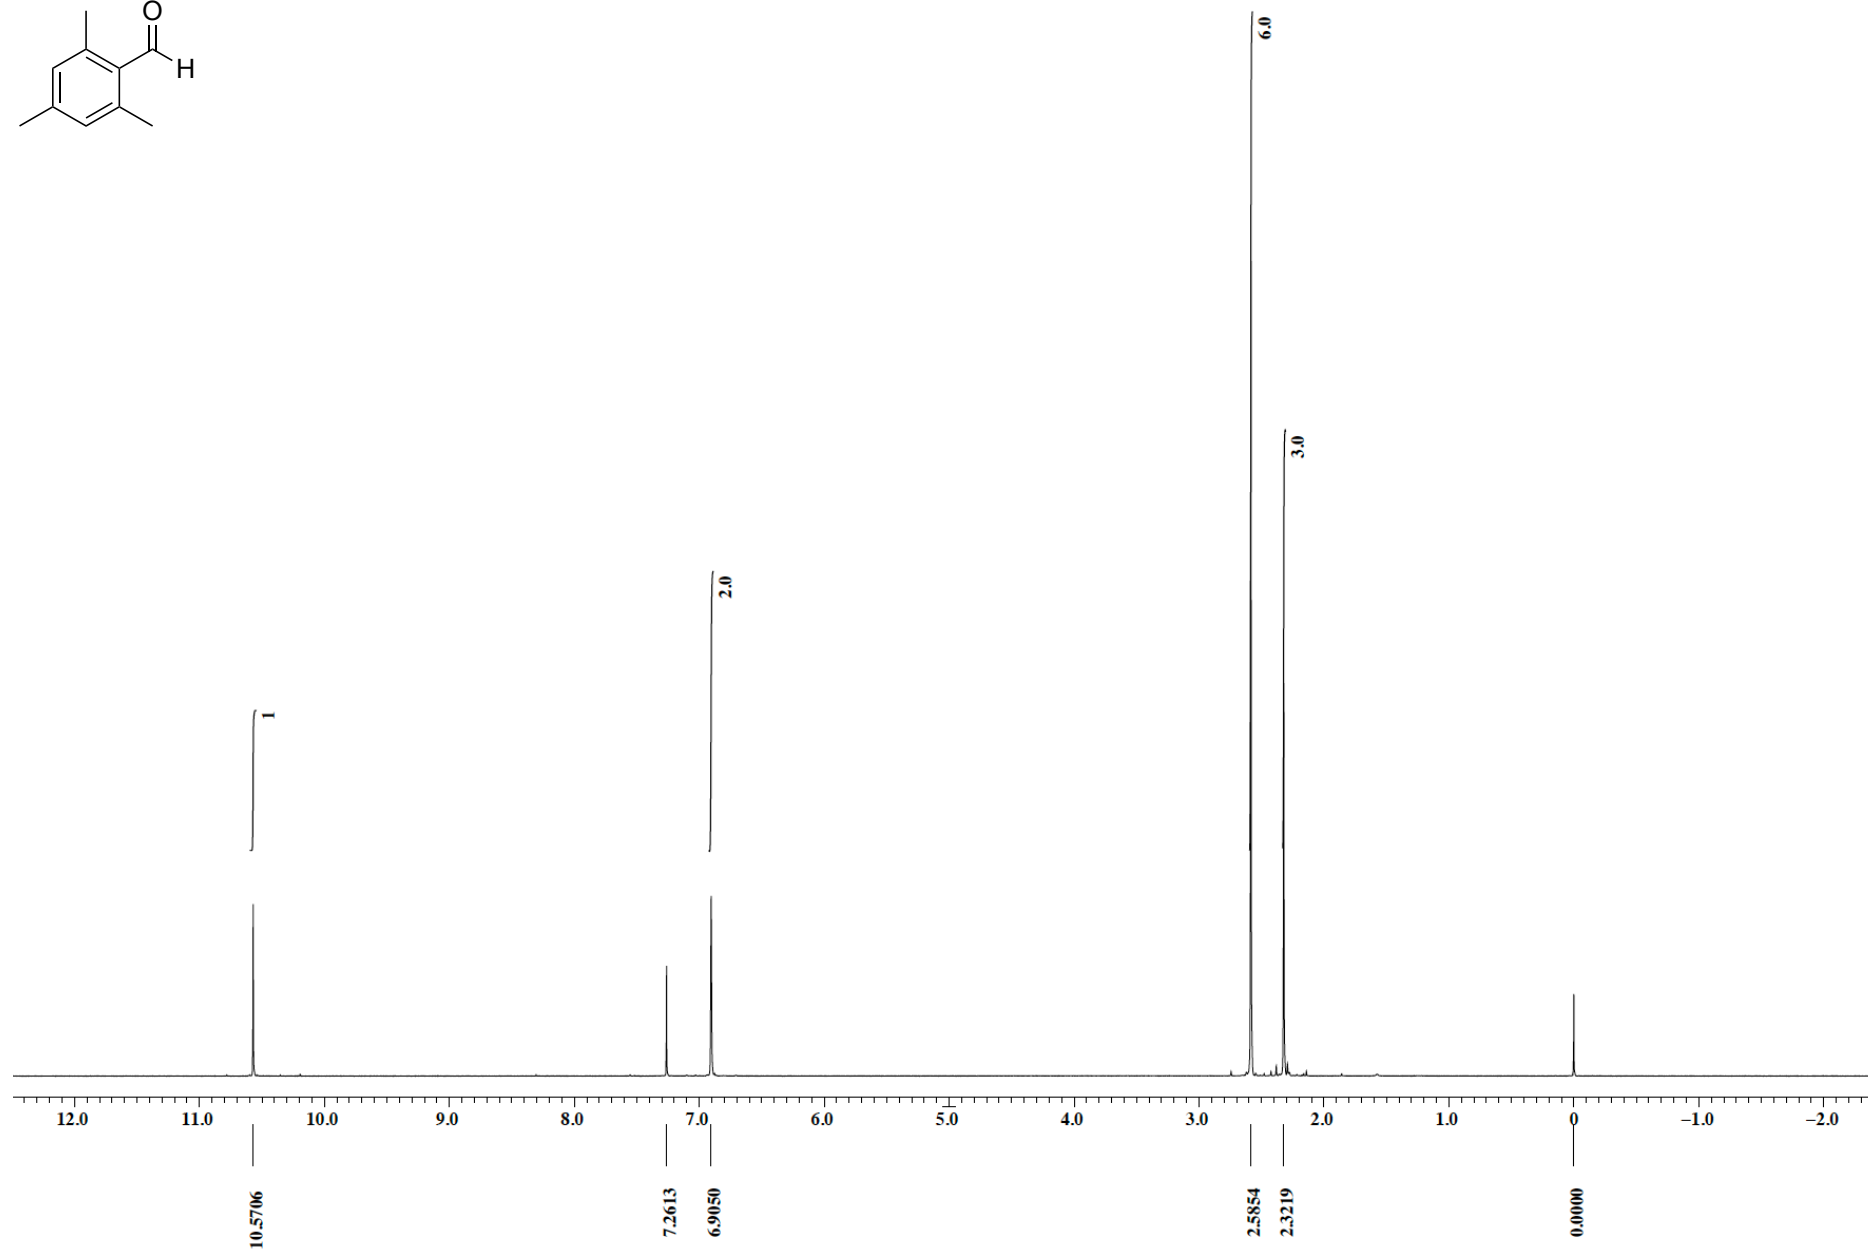

X : parts per Million : 1H

**5e**,  $^{13}\text{C}$  NMR ( $\text{CDCl}_3$ , 100 MHz)

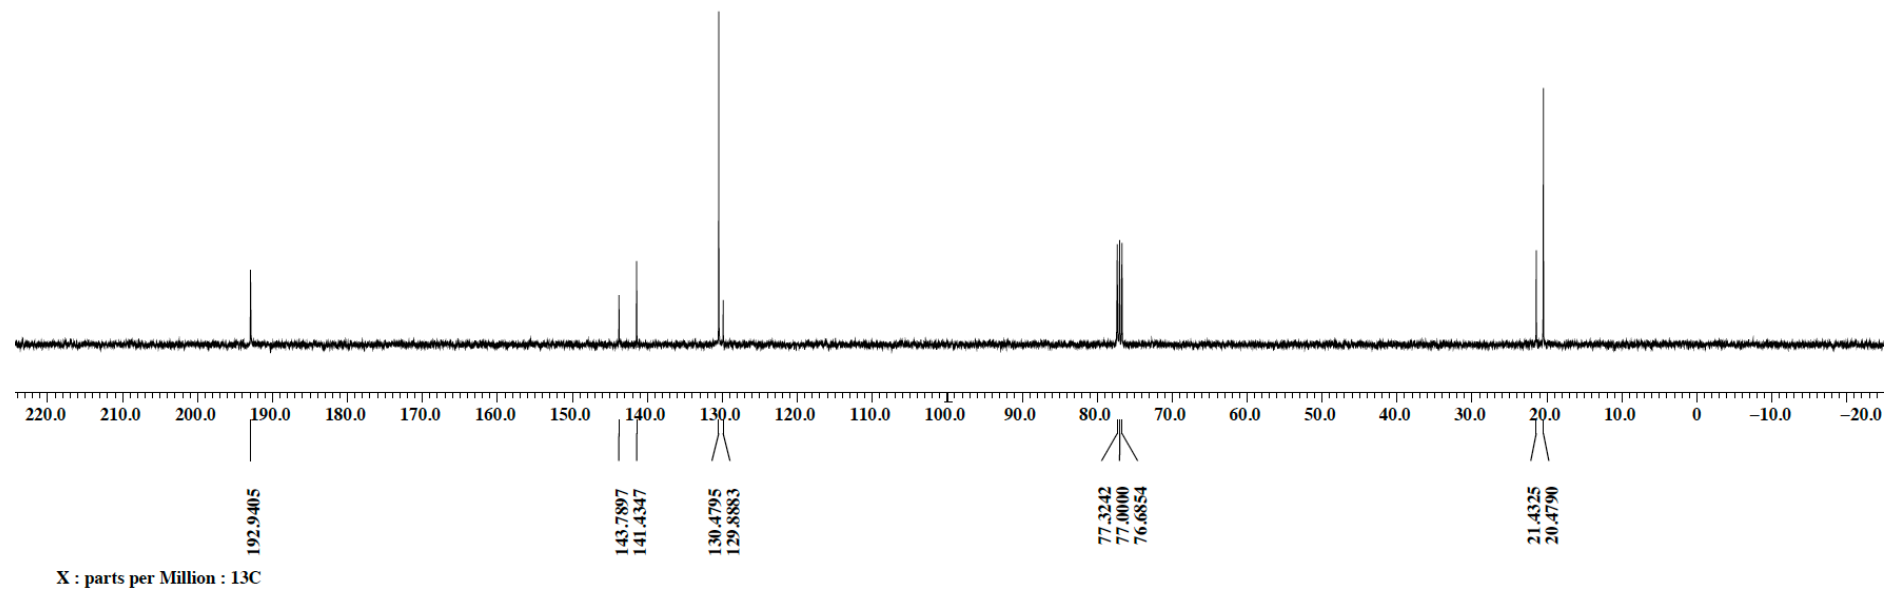

**5f**,  $^1\text{H}$  NMR ( $\text{CDCl}_3$ , 400 MHz)

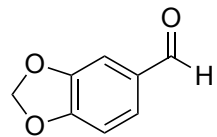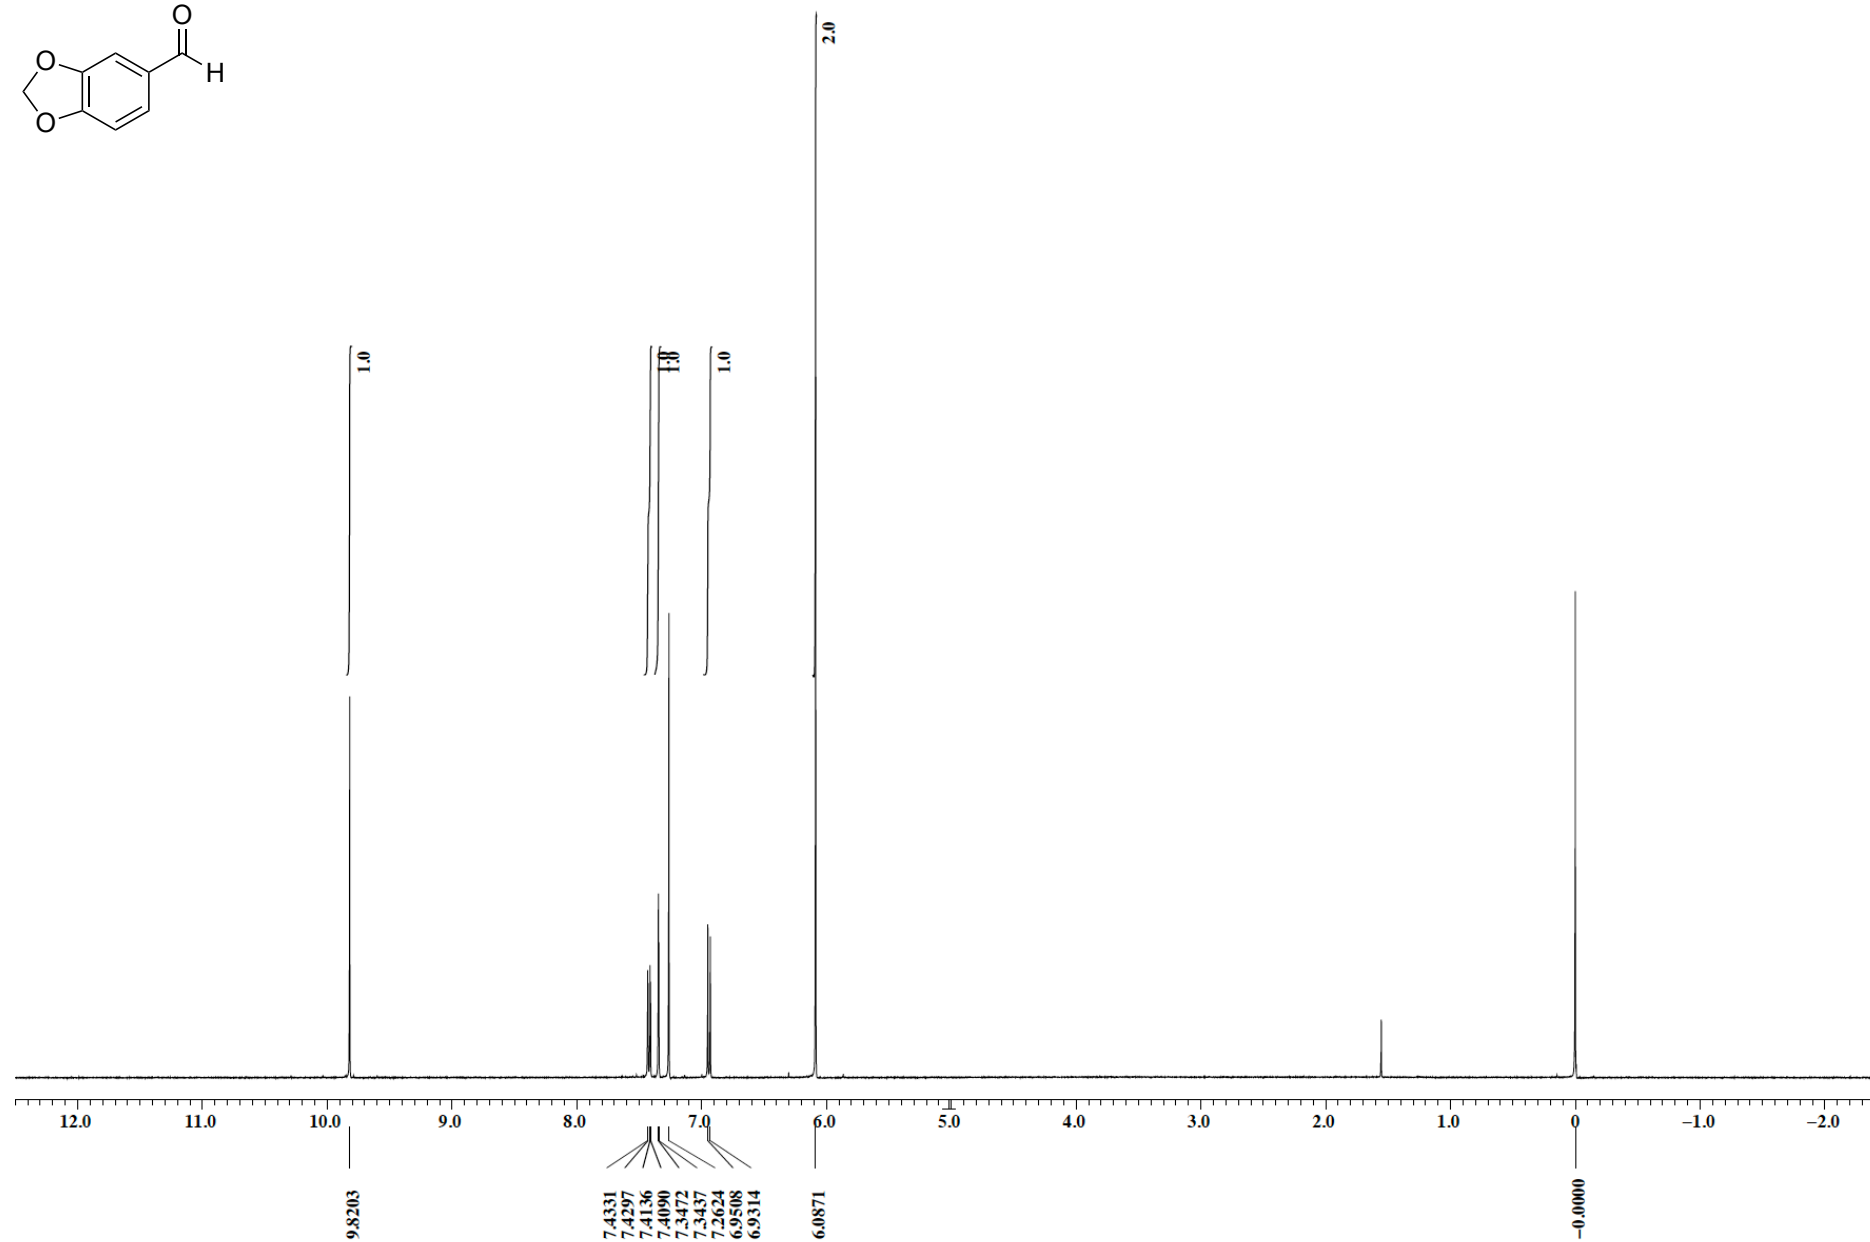

X : parts per Million :  $^1\text{H}$

**5f**,  $^{13}\text{C}$  NMR ( $\text{CDCl}_3$ , 100 MHz)

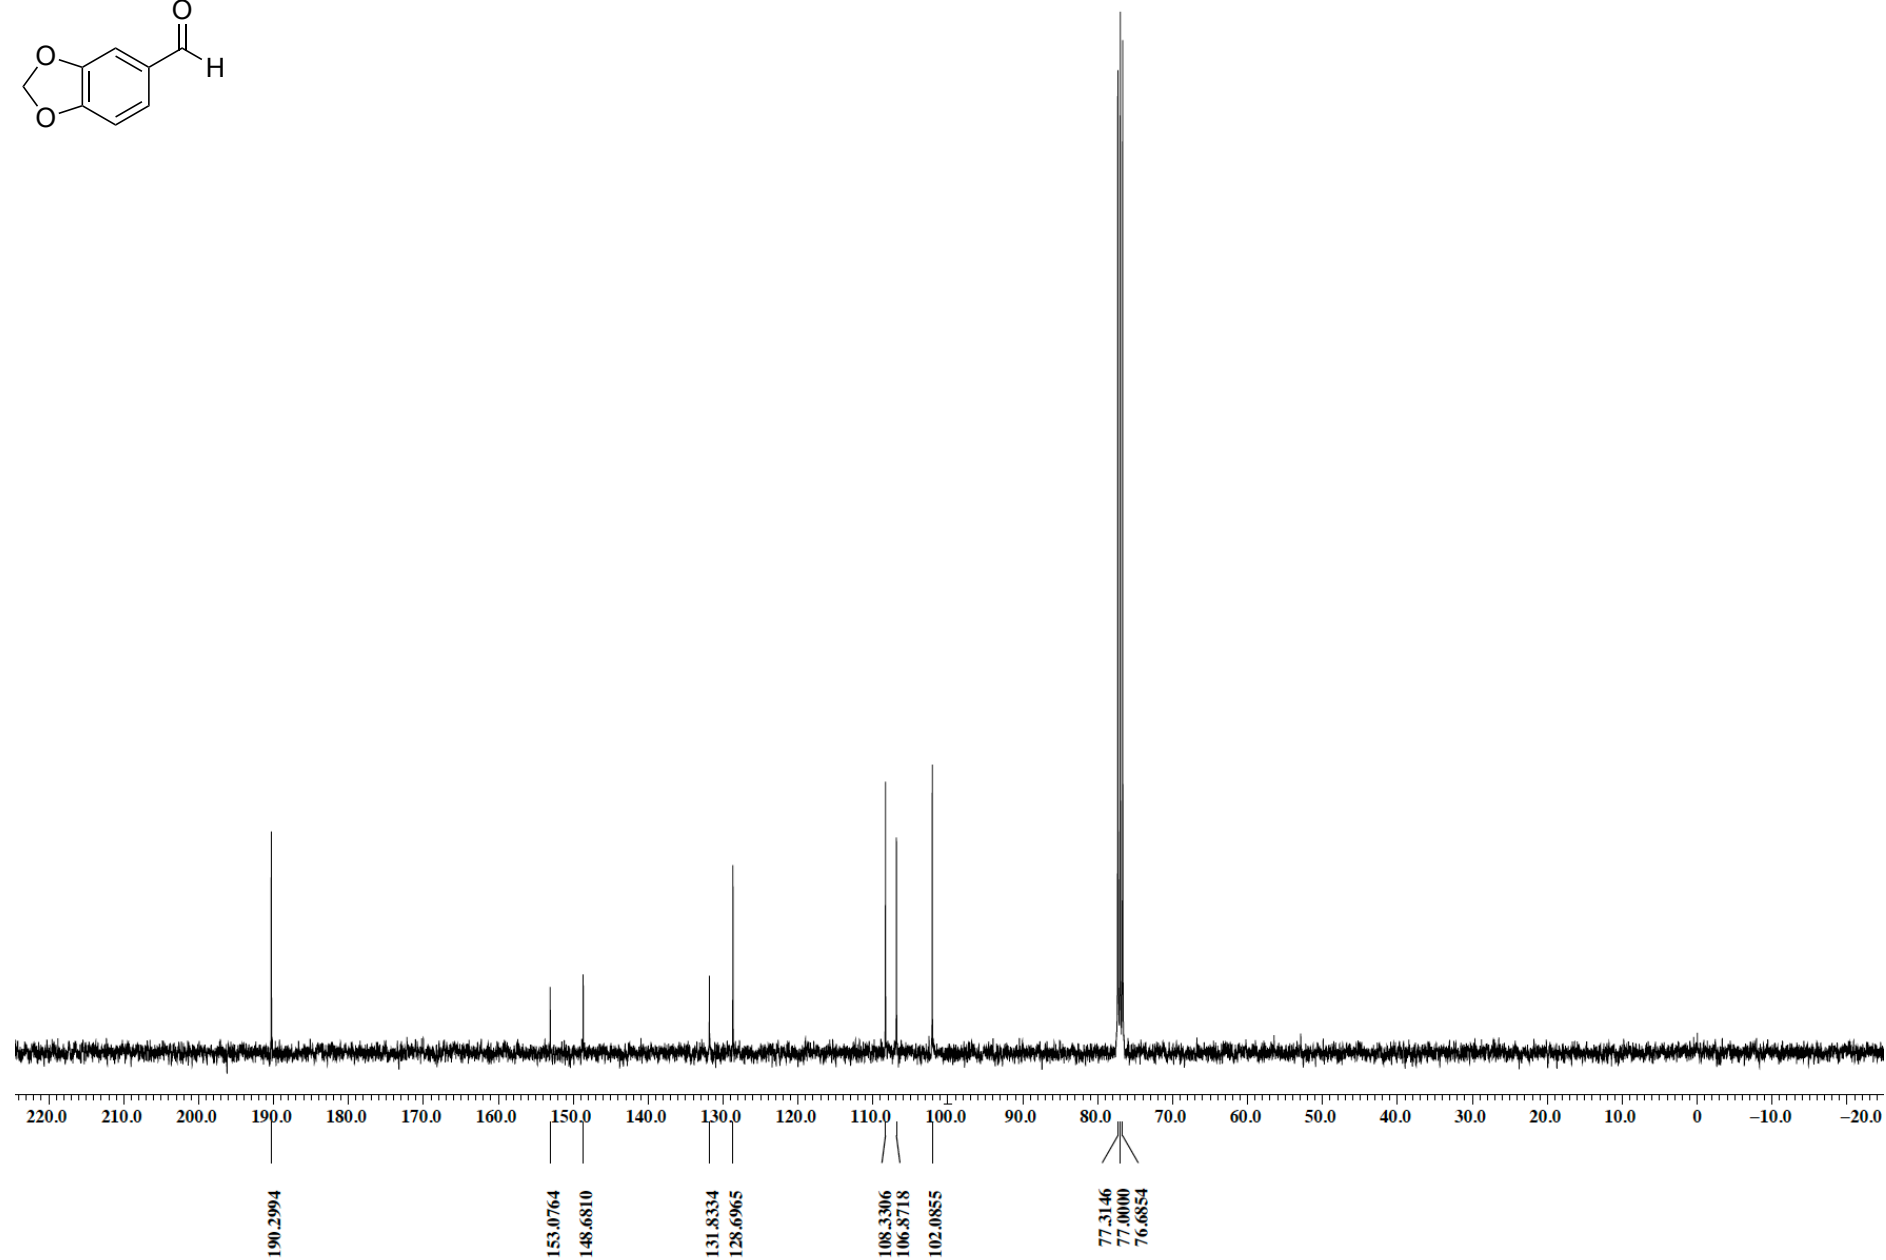

X : parts per Million :  $^{13}\text{C}$

5g,  $^1\text{H}$  NMR ( $\text{CDCl}_3$ , 400 MHz)

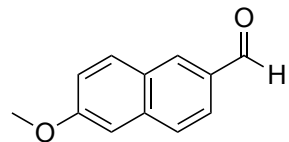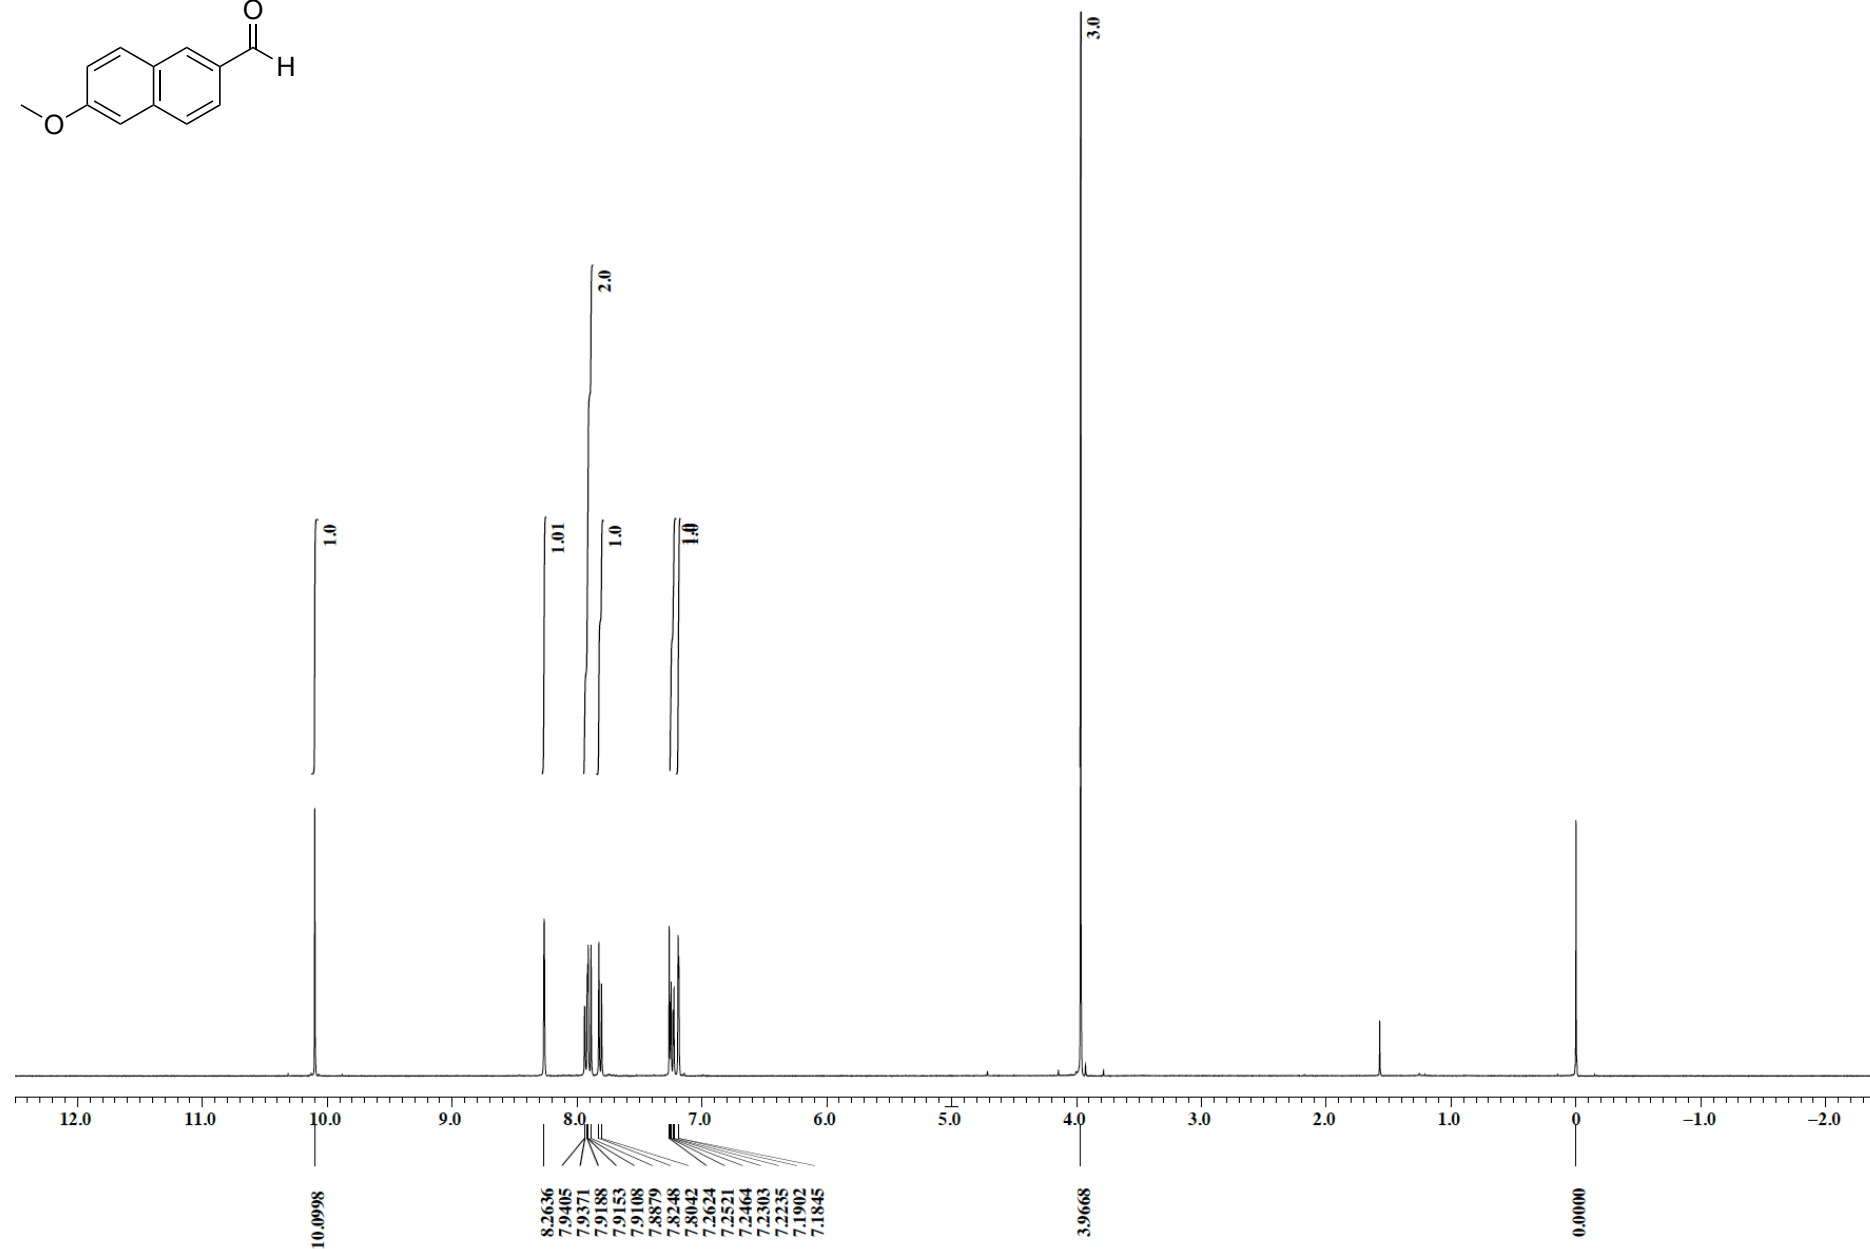

X : parts per Million :  $^1\text{H}$

**5g**,  $^{13}\text{C}$  NMR ( $\text{CD}_3\text{CN}$ , 100 MHz)

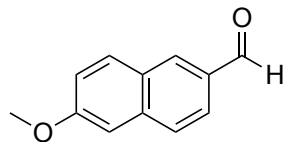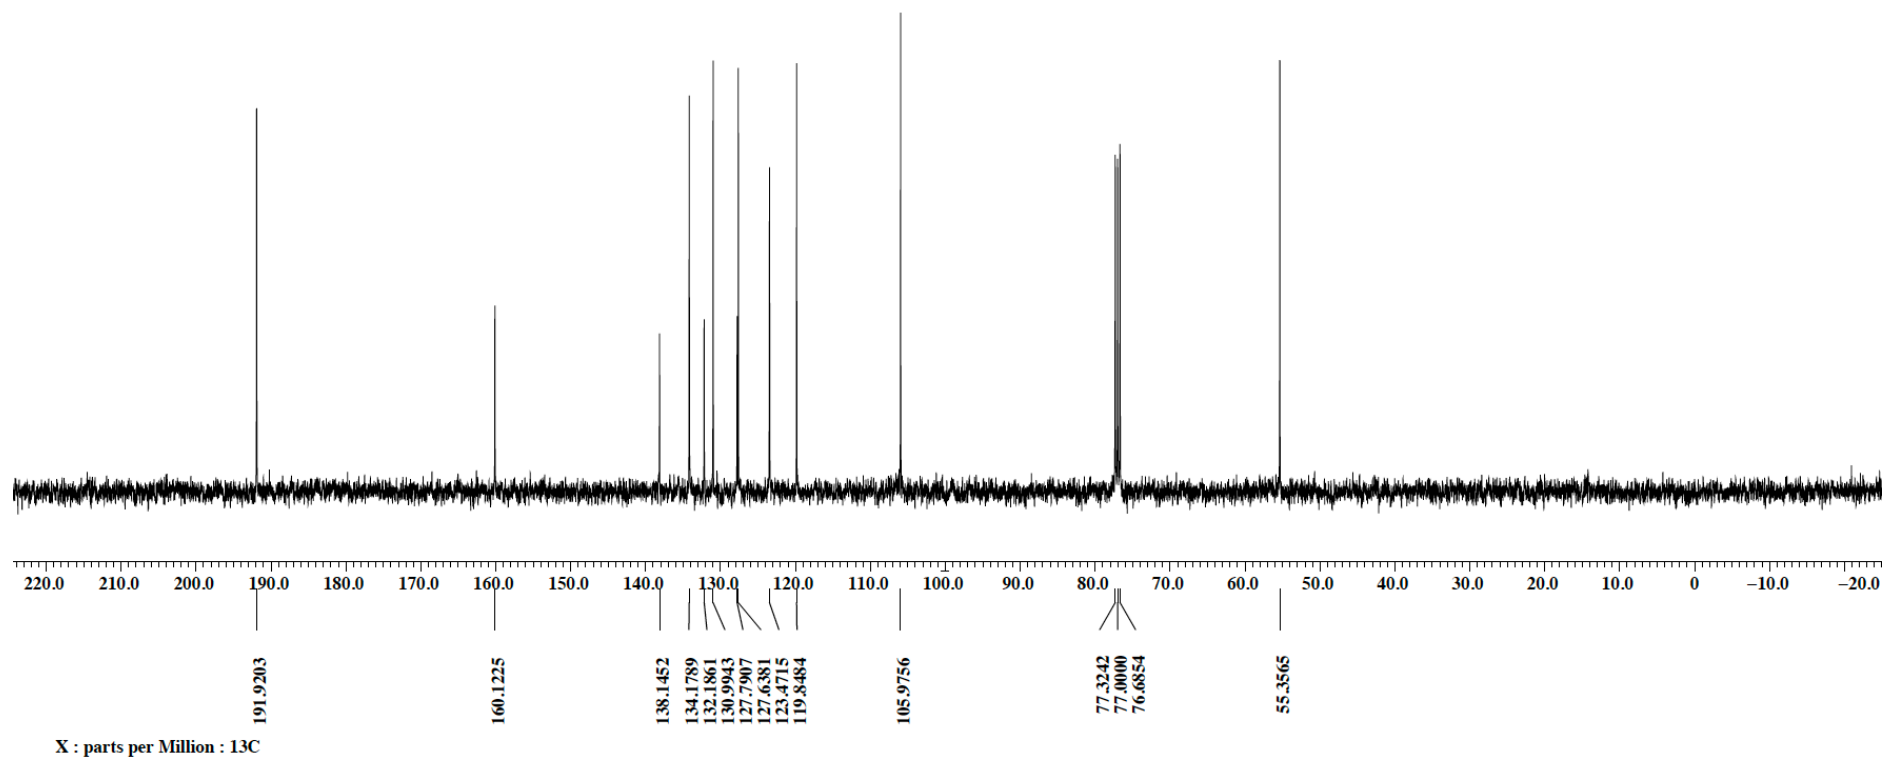

**5h**,  $^1\text{H}$  NMR ( $\text{CDCl}_3$ , 400 MHz)

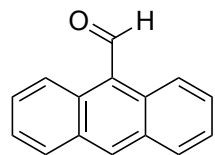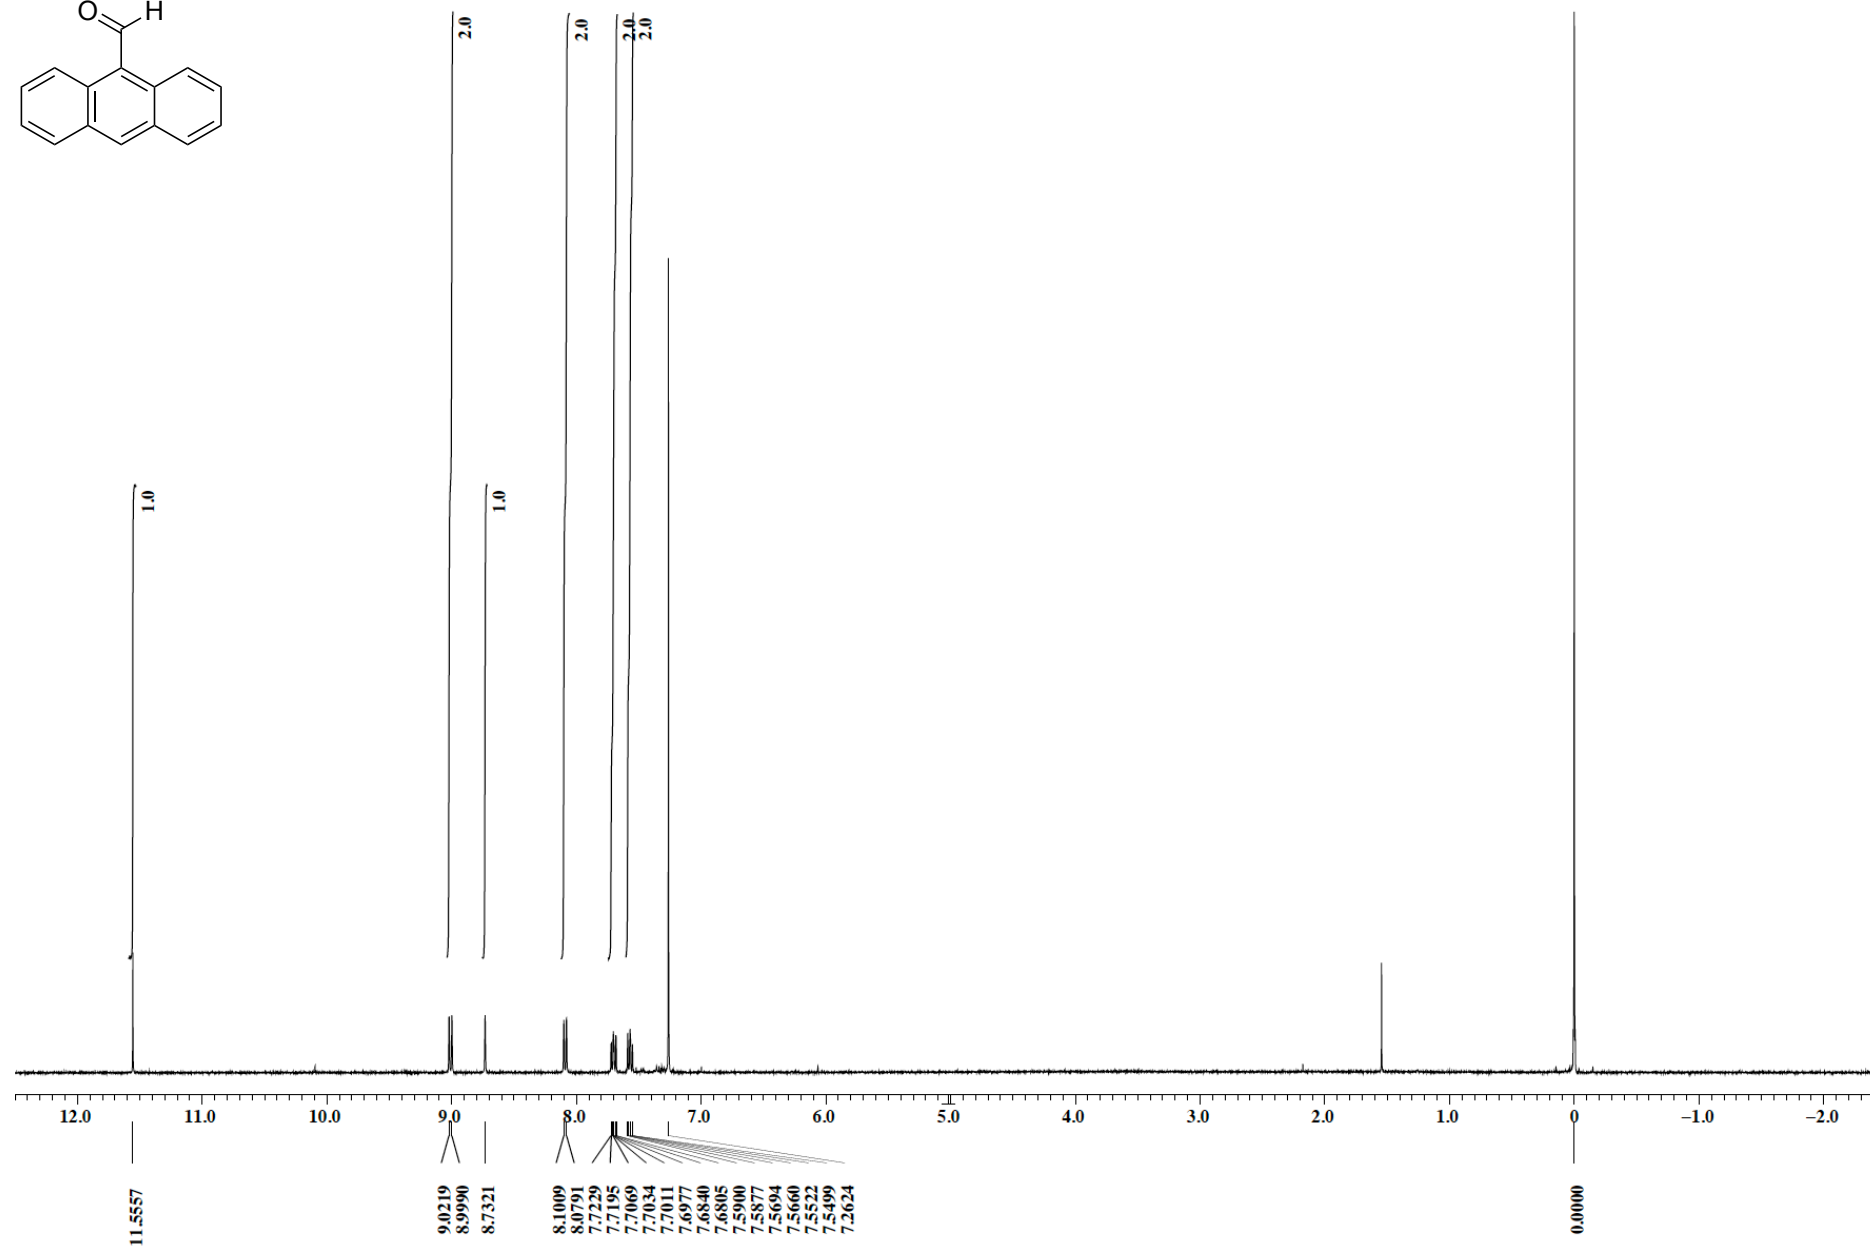

X : parts per Million :  $^1\text{H}$

**5h**,  $^{13}\text{C}$  NMR ( $\text{CDCl}_3$ , 100 MHz)

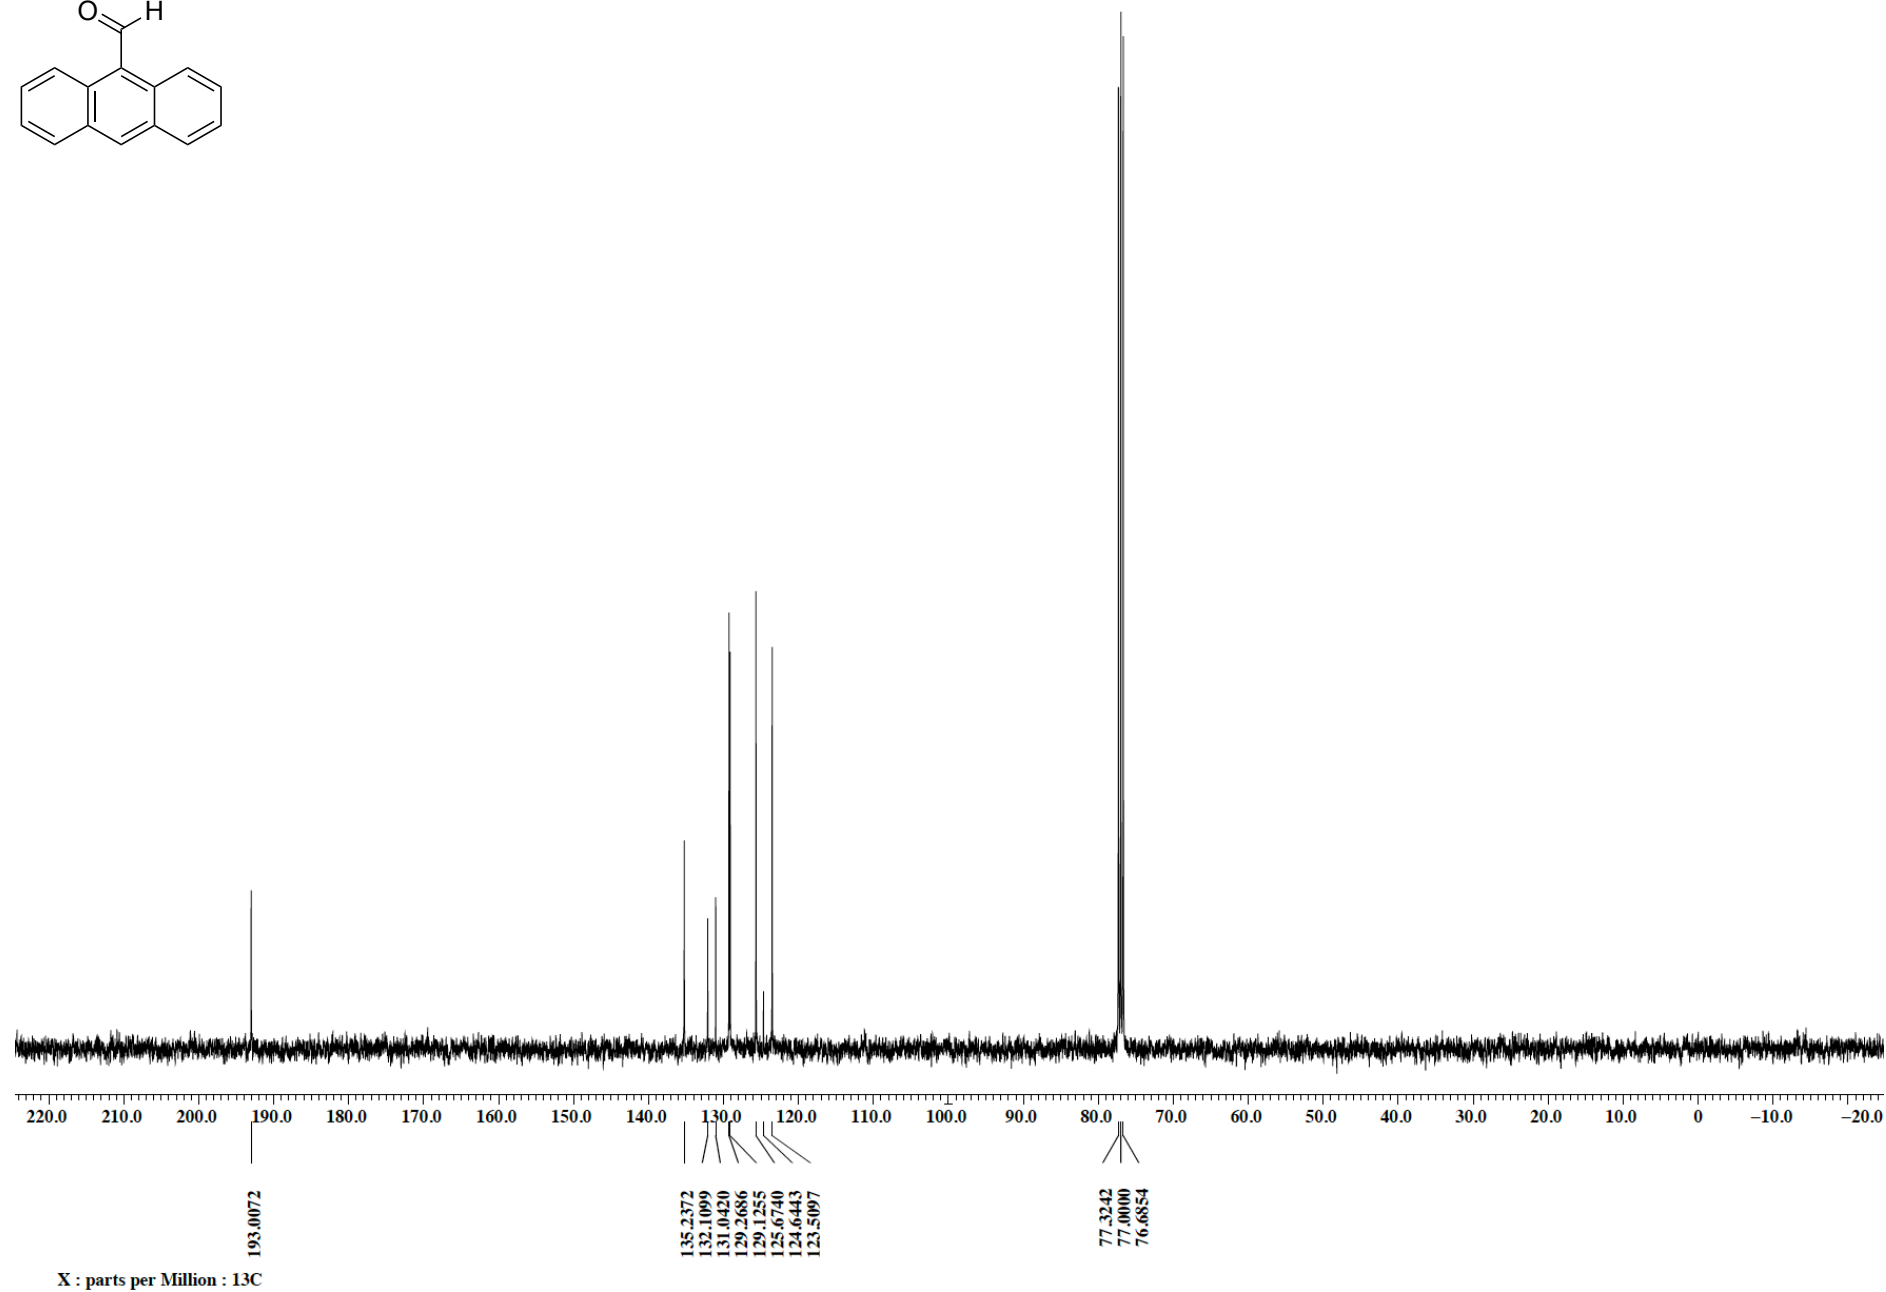



**5i**,  $^1\text{H}$  NMR ( $\text{CDCl}_3$ , 400 MHz)

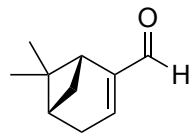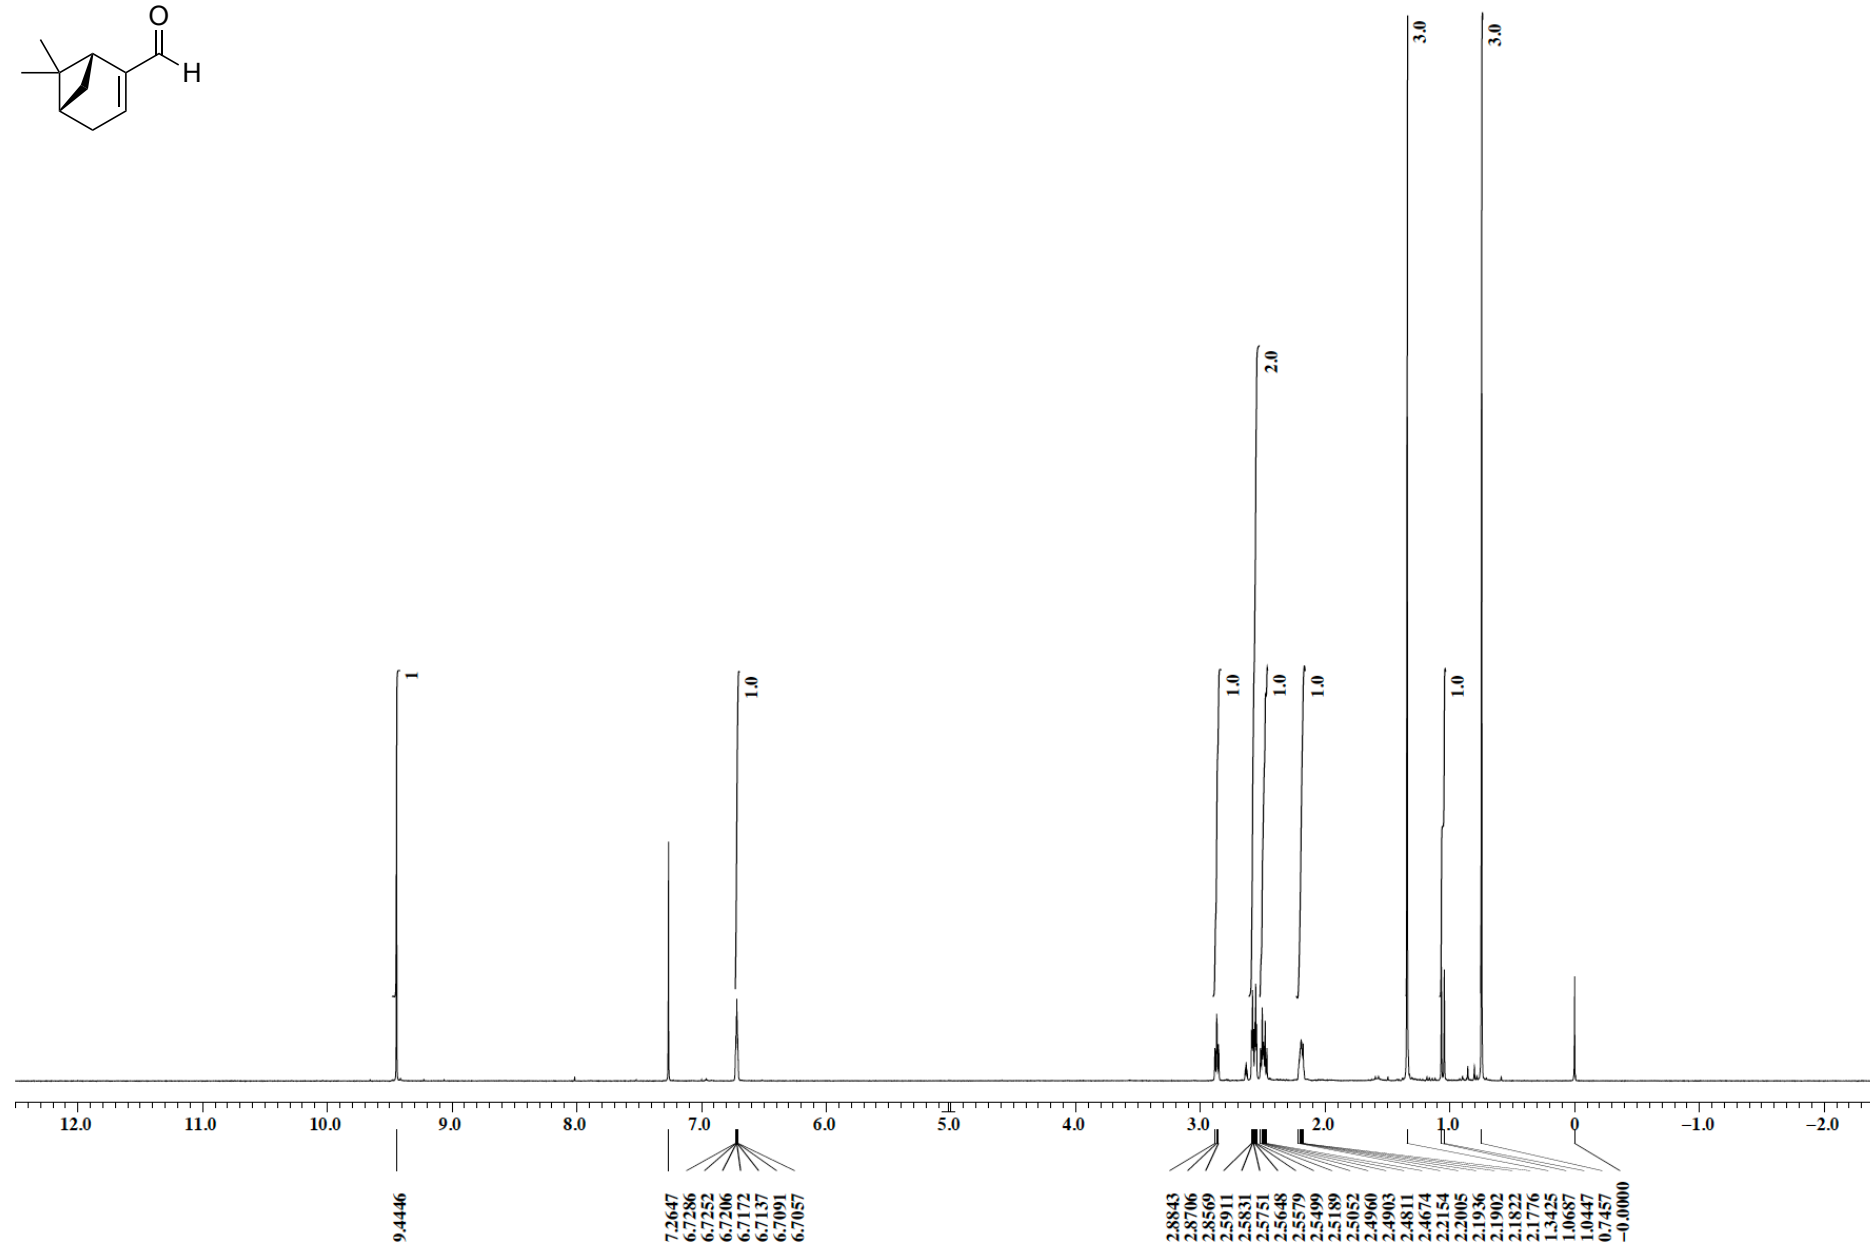

X : parts per Million : 1H

**5i**,  $^{13}\text{C}$  NMR ( $\text{CDCl}_3$ , 100 MHz)

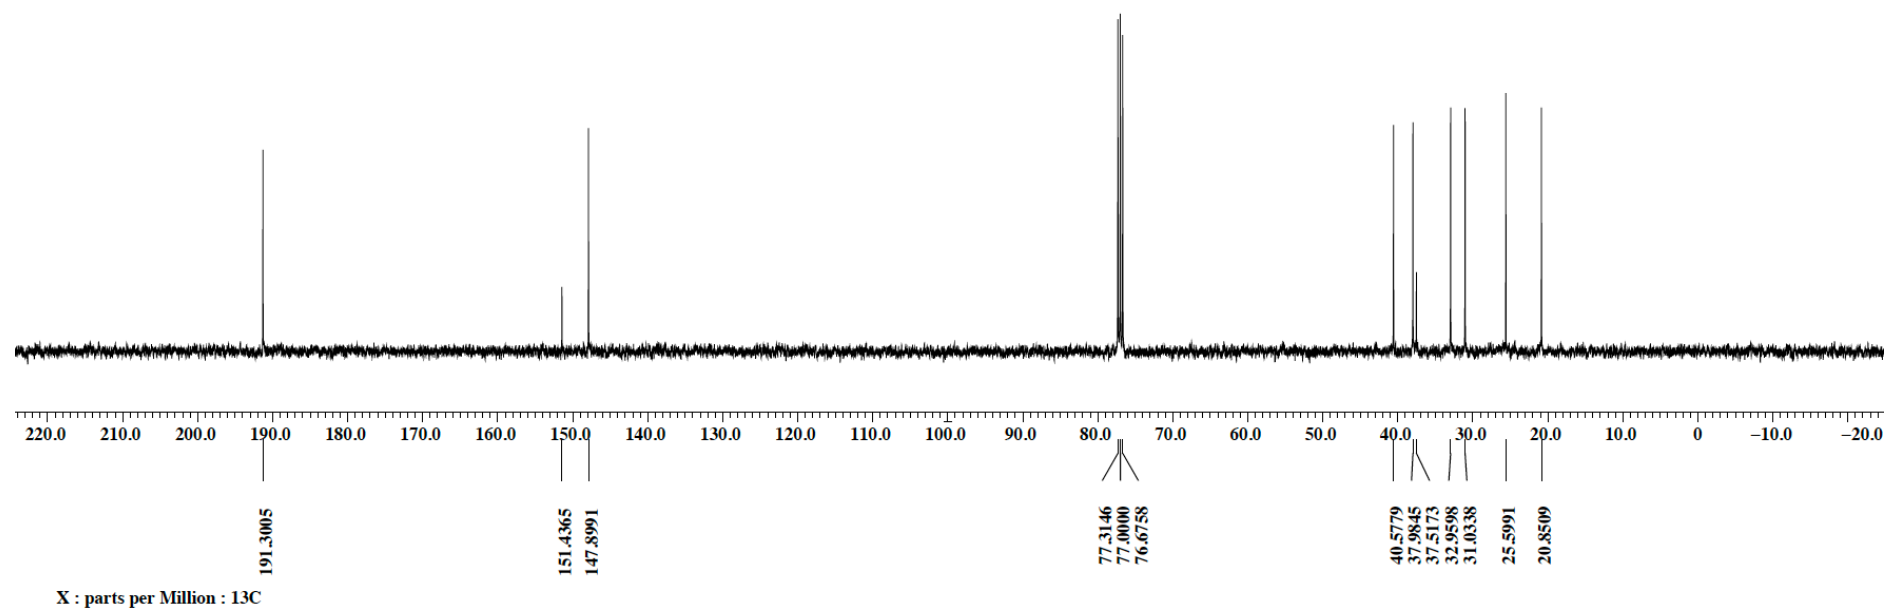

**5j**,  $^1\text{H}$  NMR ( $\text{CDCl}_3$ , 400 MHz)

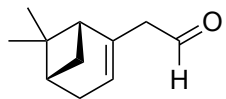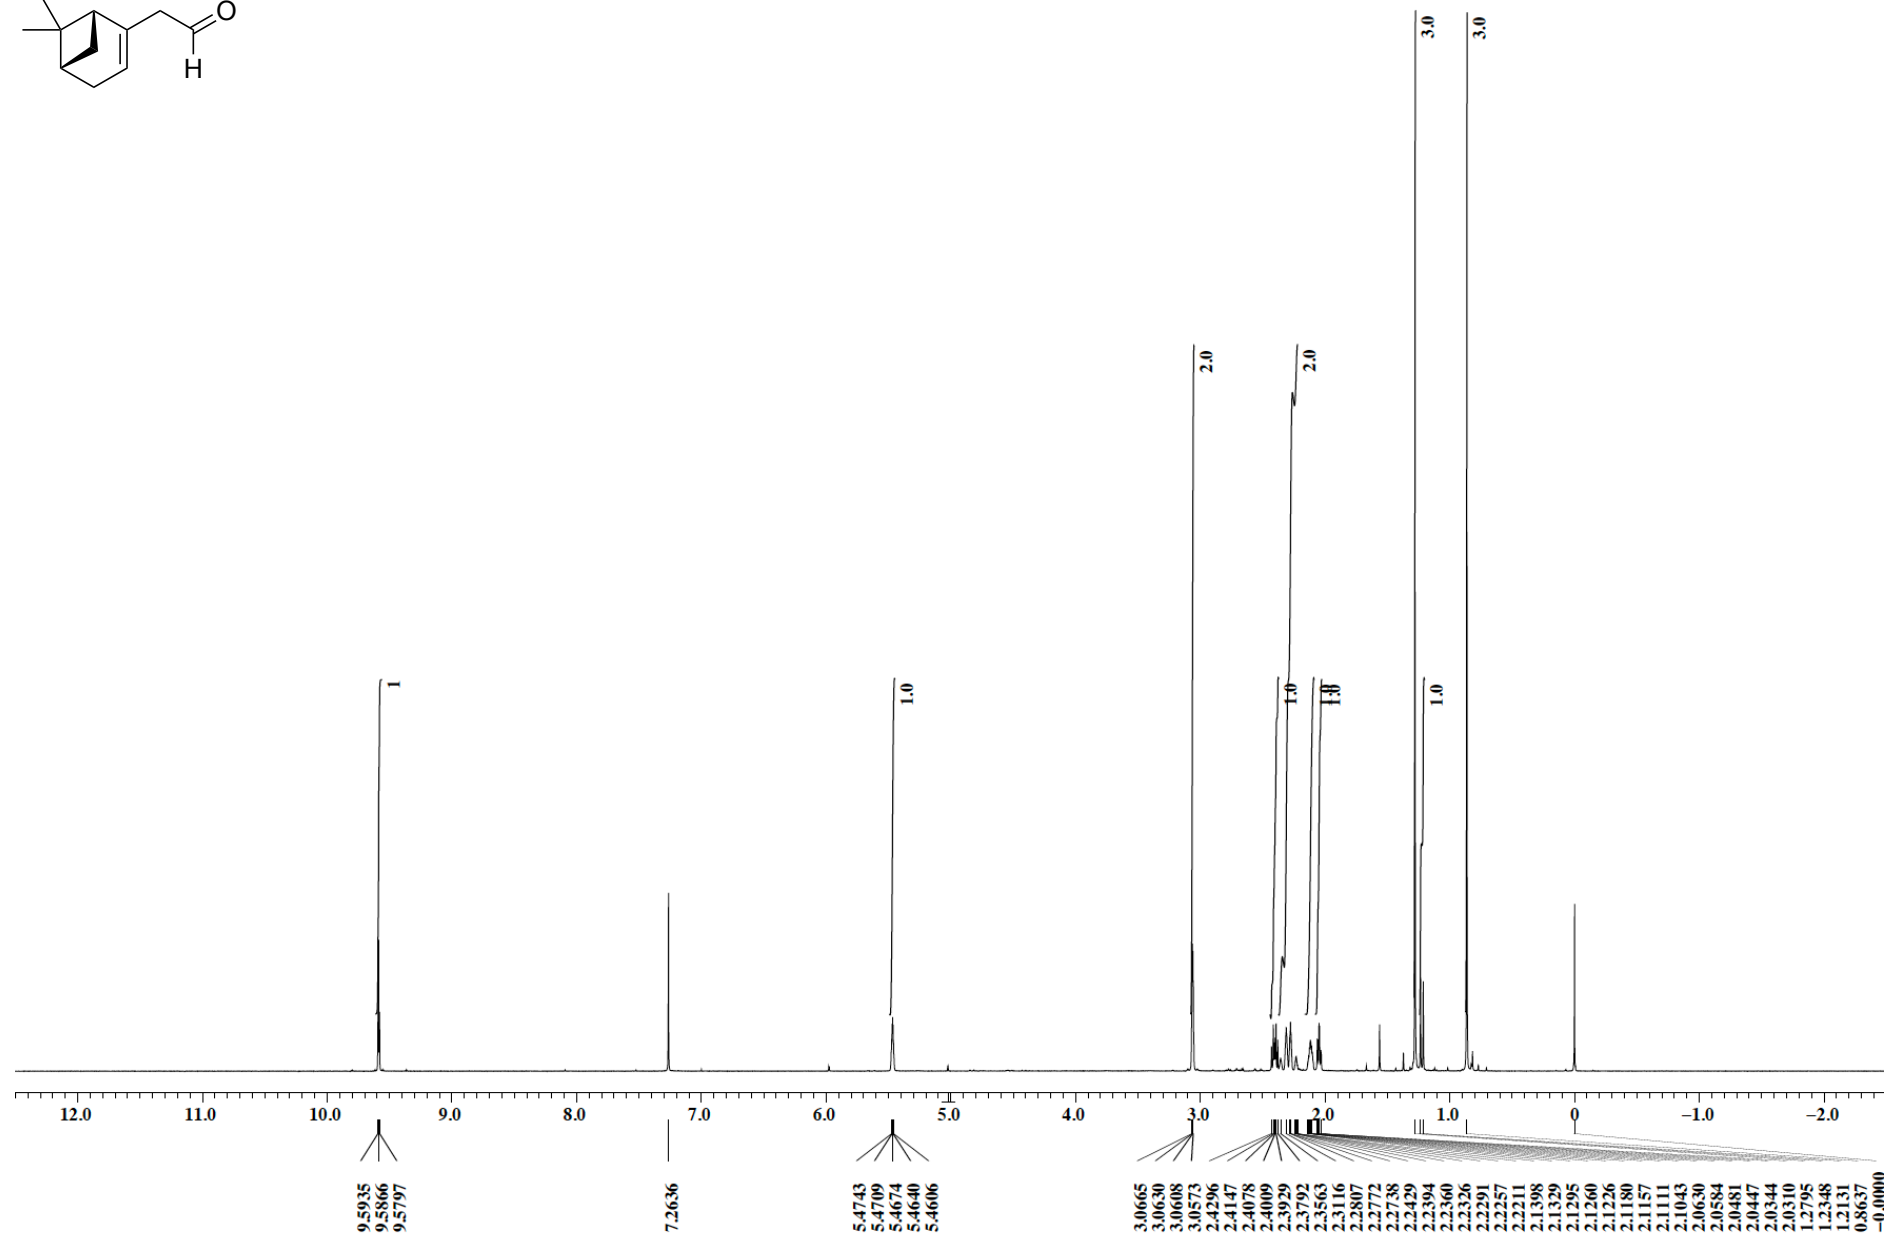

X : parts per Million :  $^1\text{H}$

**5j**,  $^{13}\text{C}$  NMR ( $\text{CDCl}_3$ , 100 MHz)

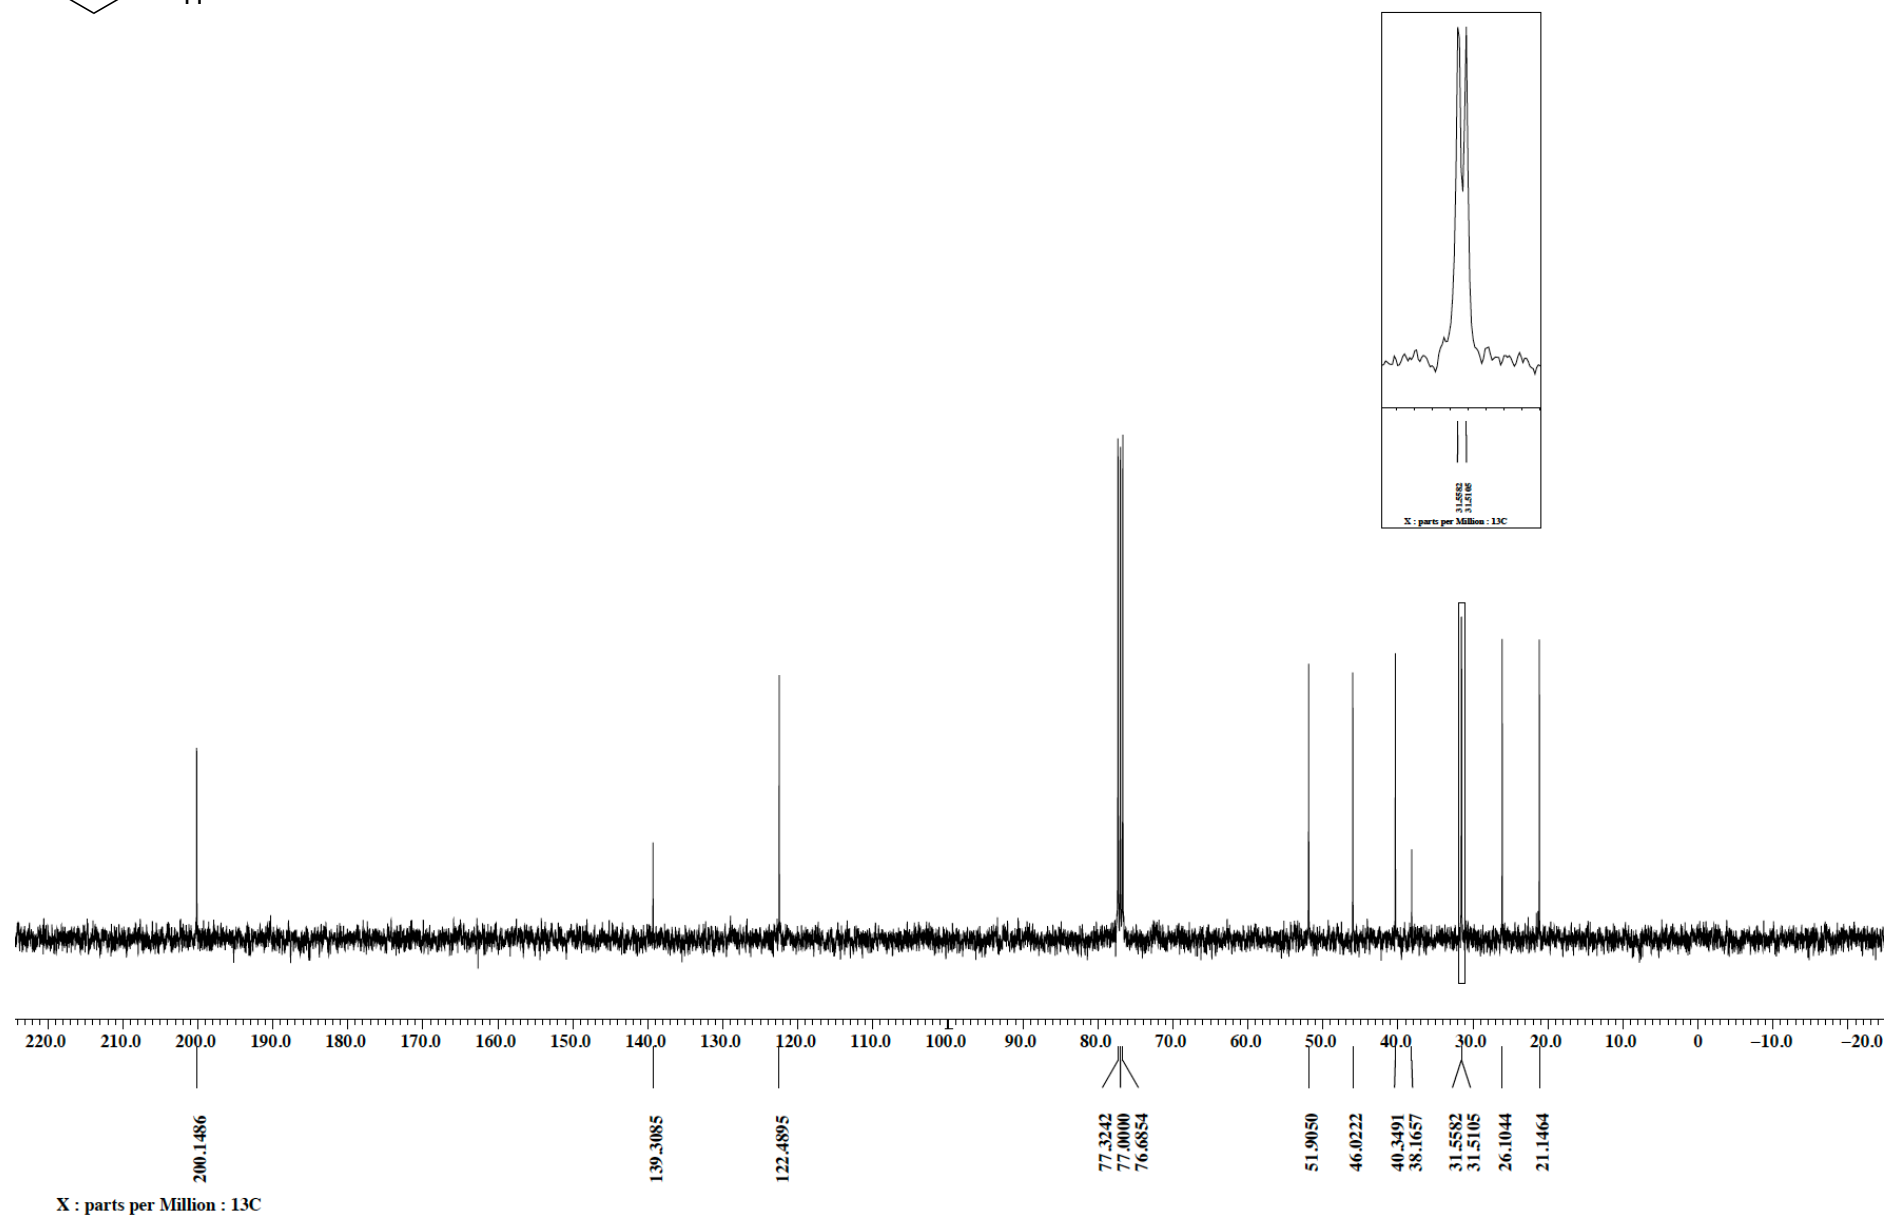

**5k**,  $^1\text{H}$  NMR ( $\text{CDCl}_3$ , 400 MHz)

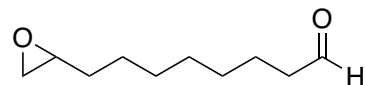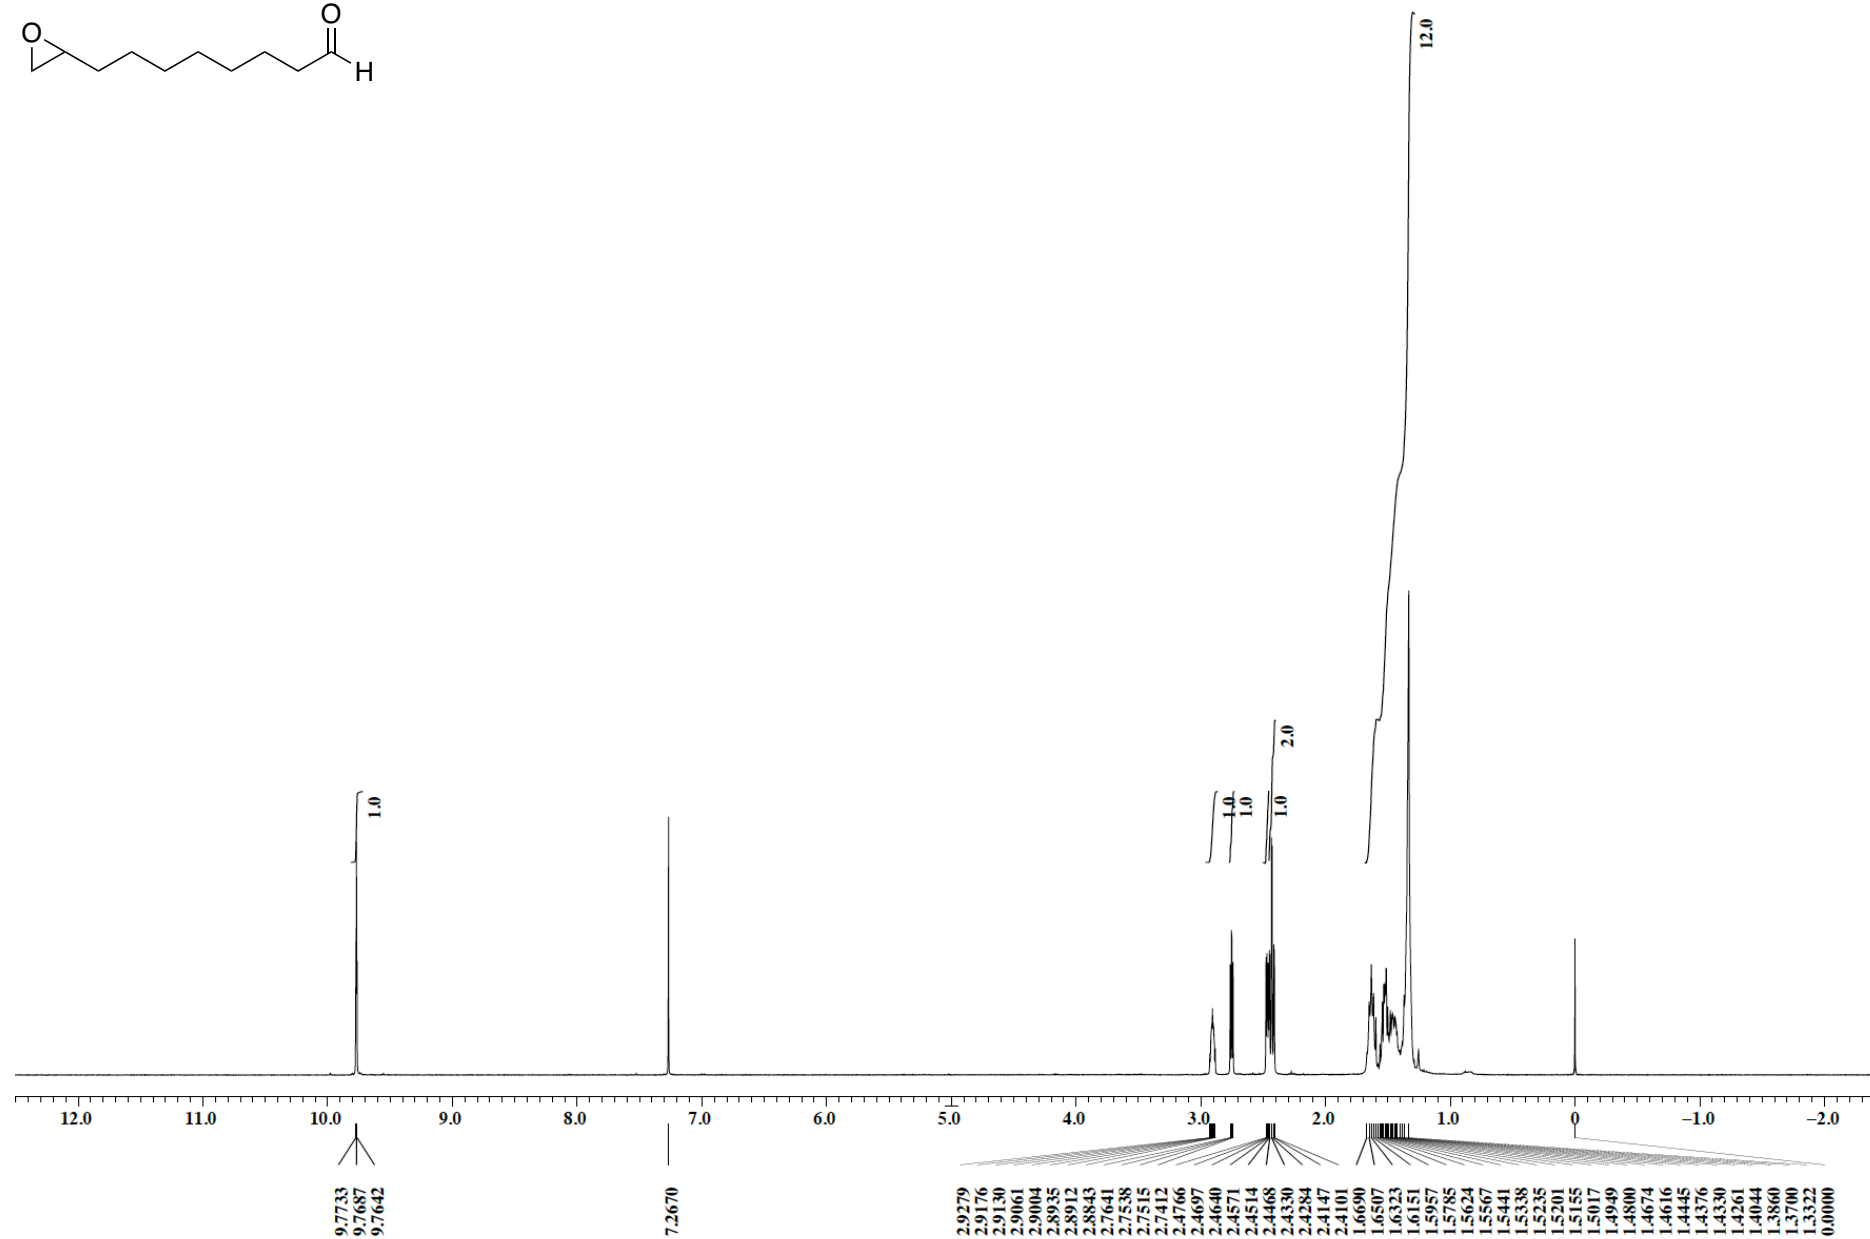

X : parts per Million :  $^1\text{H}$

**5k**,  $^{13}\text{C}$  NMR ( $\text{CDCl}_3$ , 100 MHz)

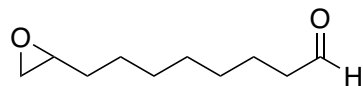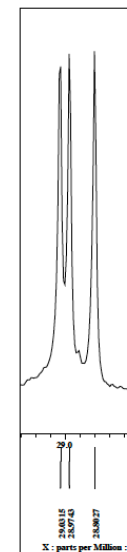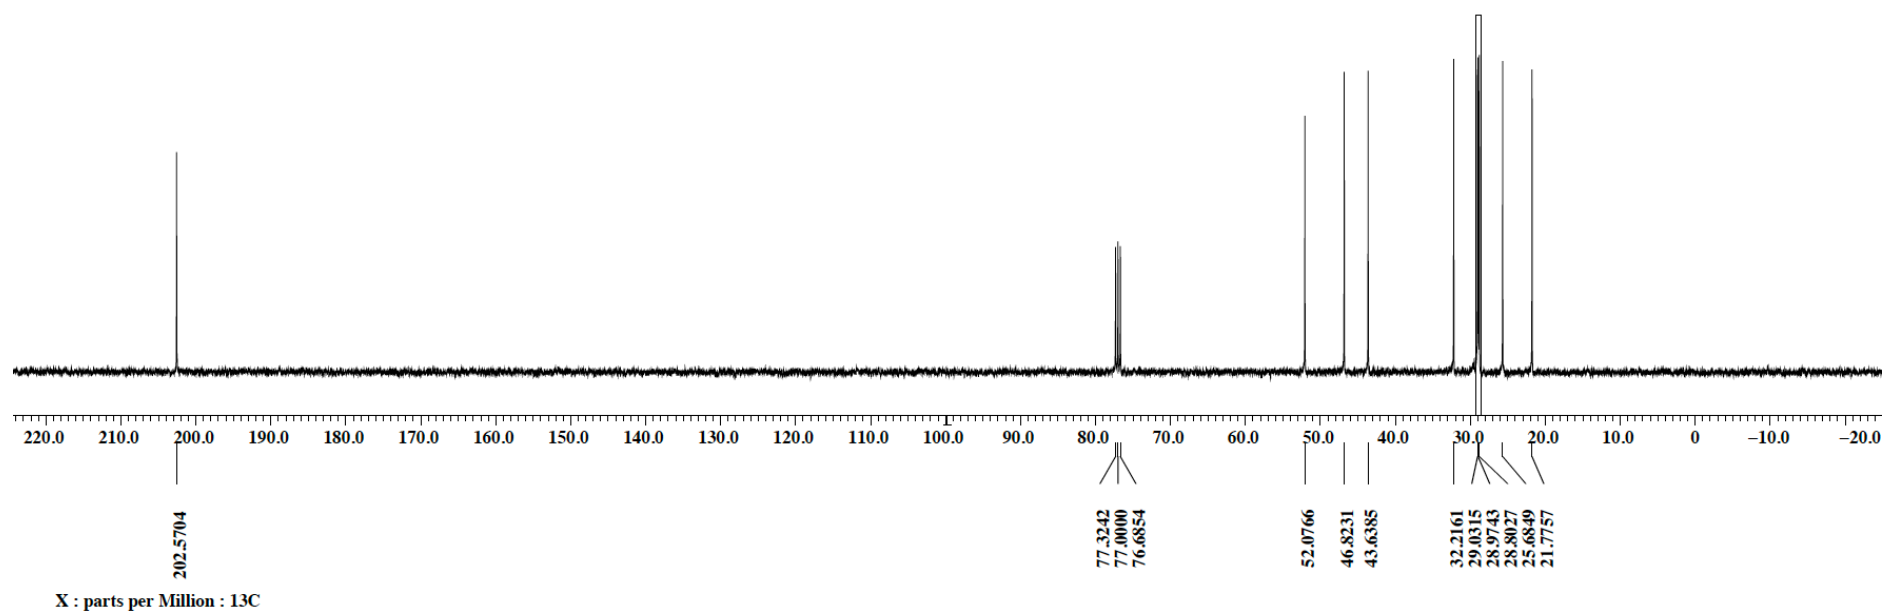

**5l**,  $^1\text{H}$  NMR ( $\text{CDCl}_3$ , 400 MHz)

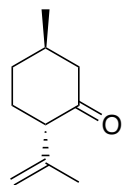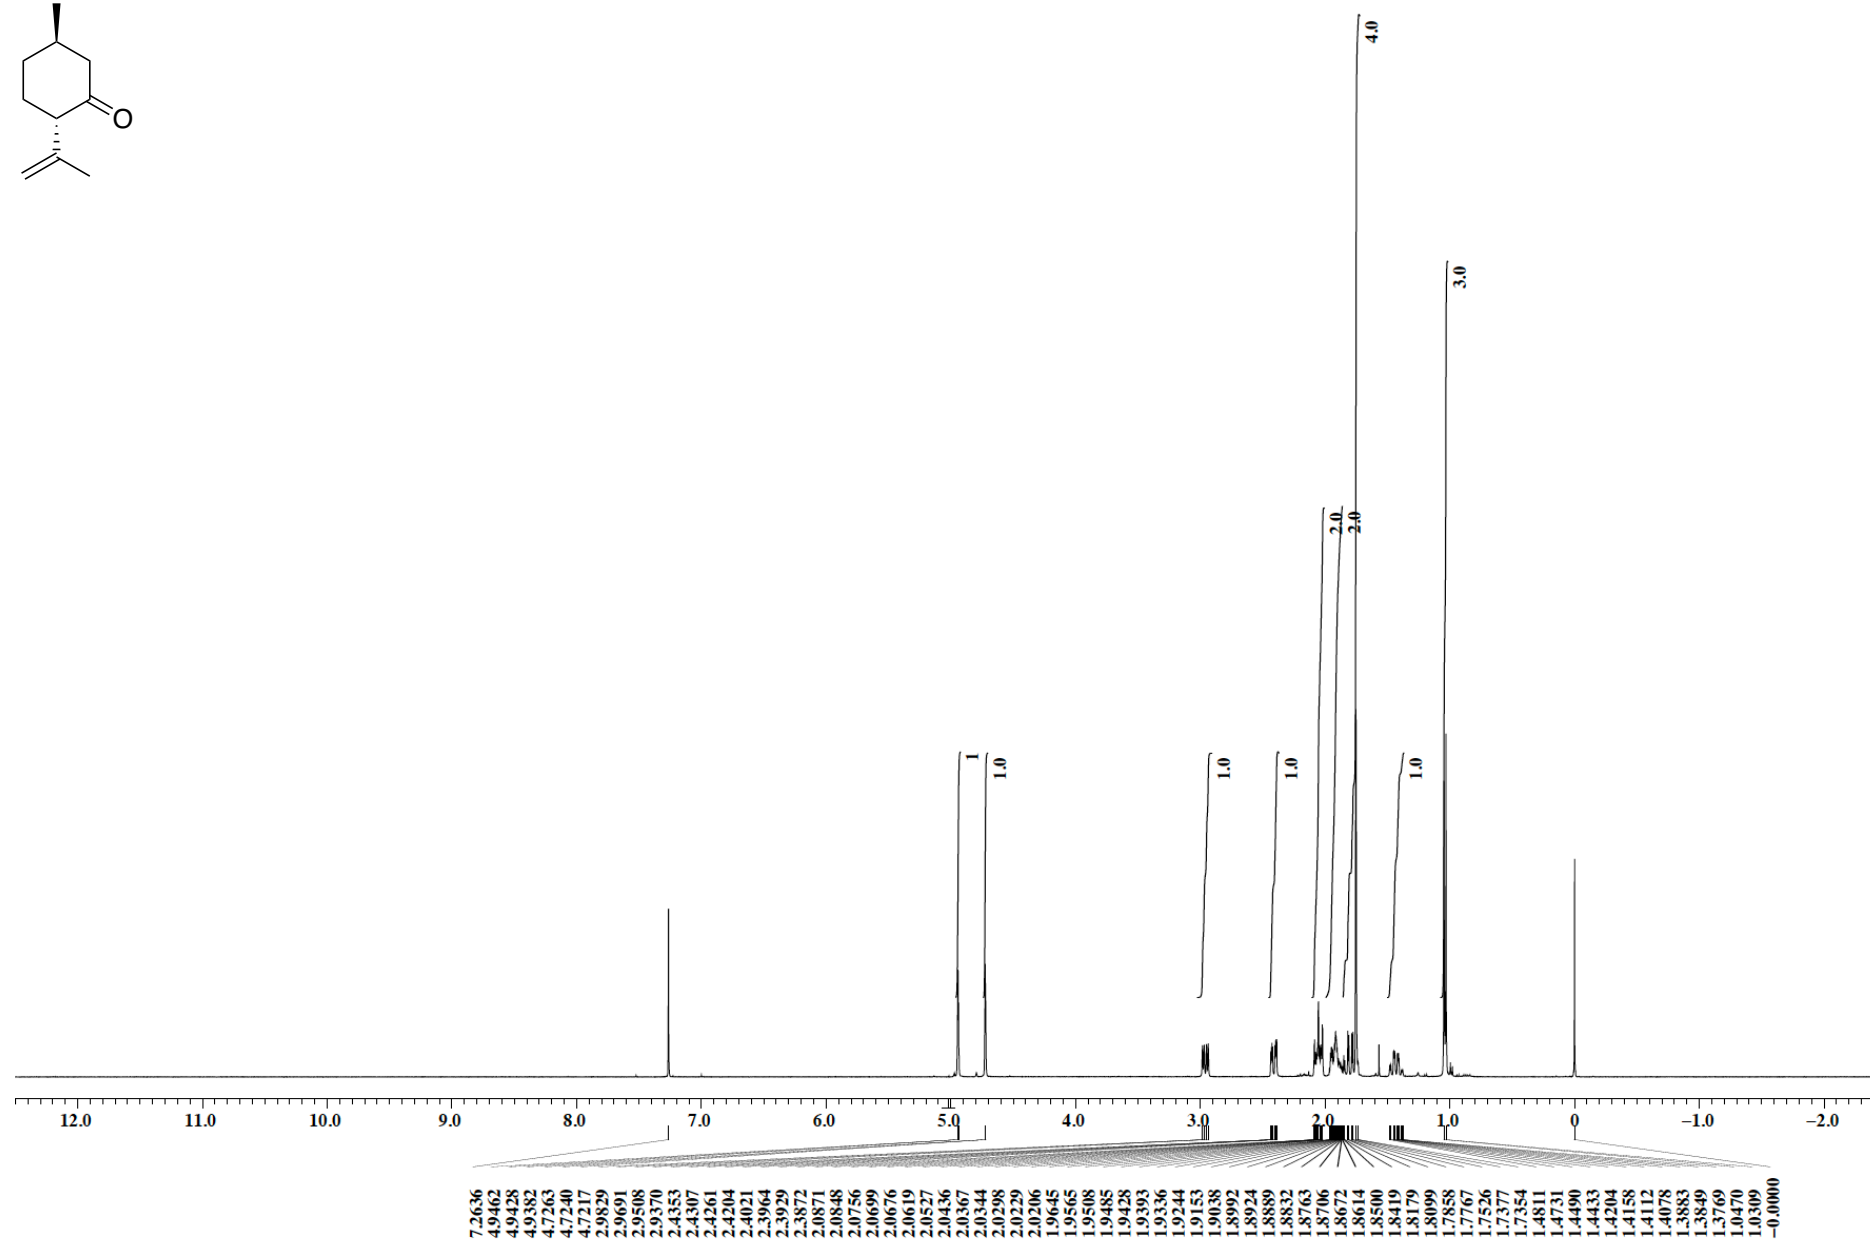

X : parts per Million :  $^1\text{H}$

**5l**,  $^{13}\text{C}$  NMR ( $\text{CDCl}_3$ , 100 MHz)

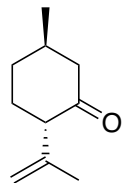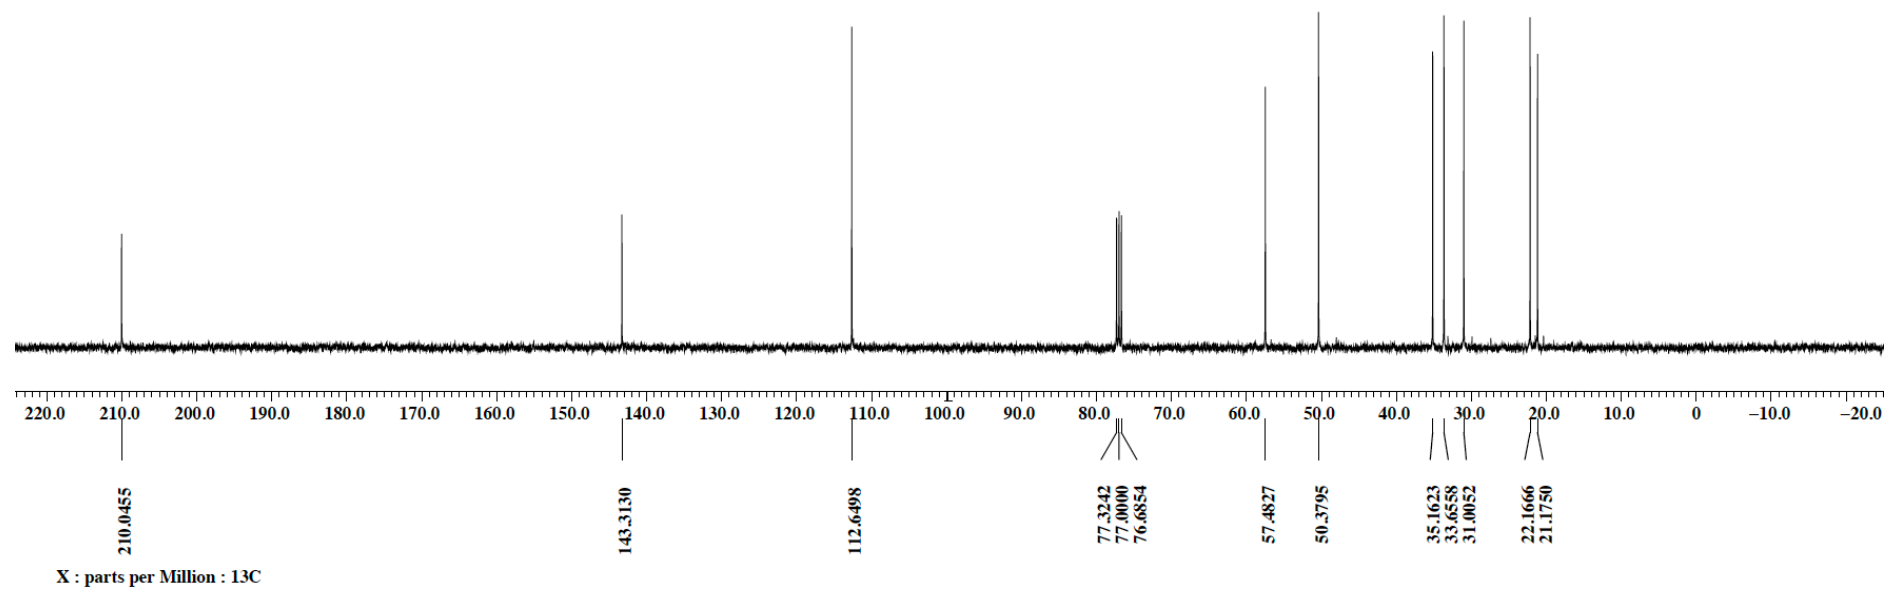



**5m**,  $^1\text{H}$  NMR ( $\text{CDCl}_3$ , 400 MHz)

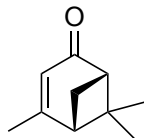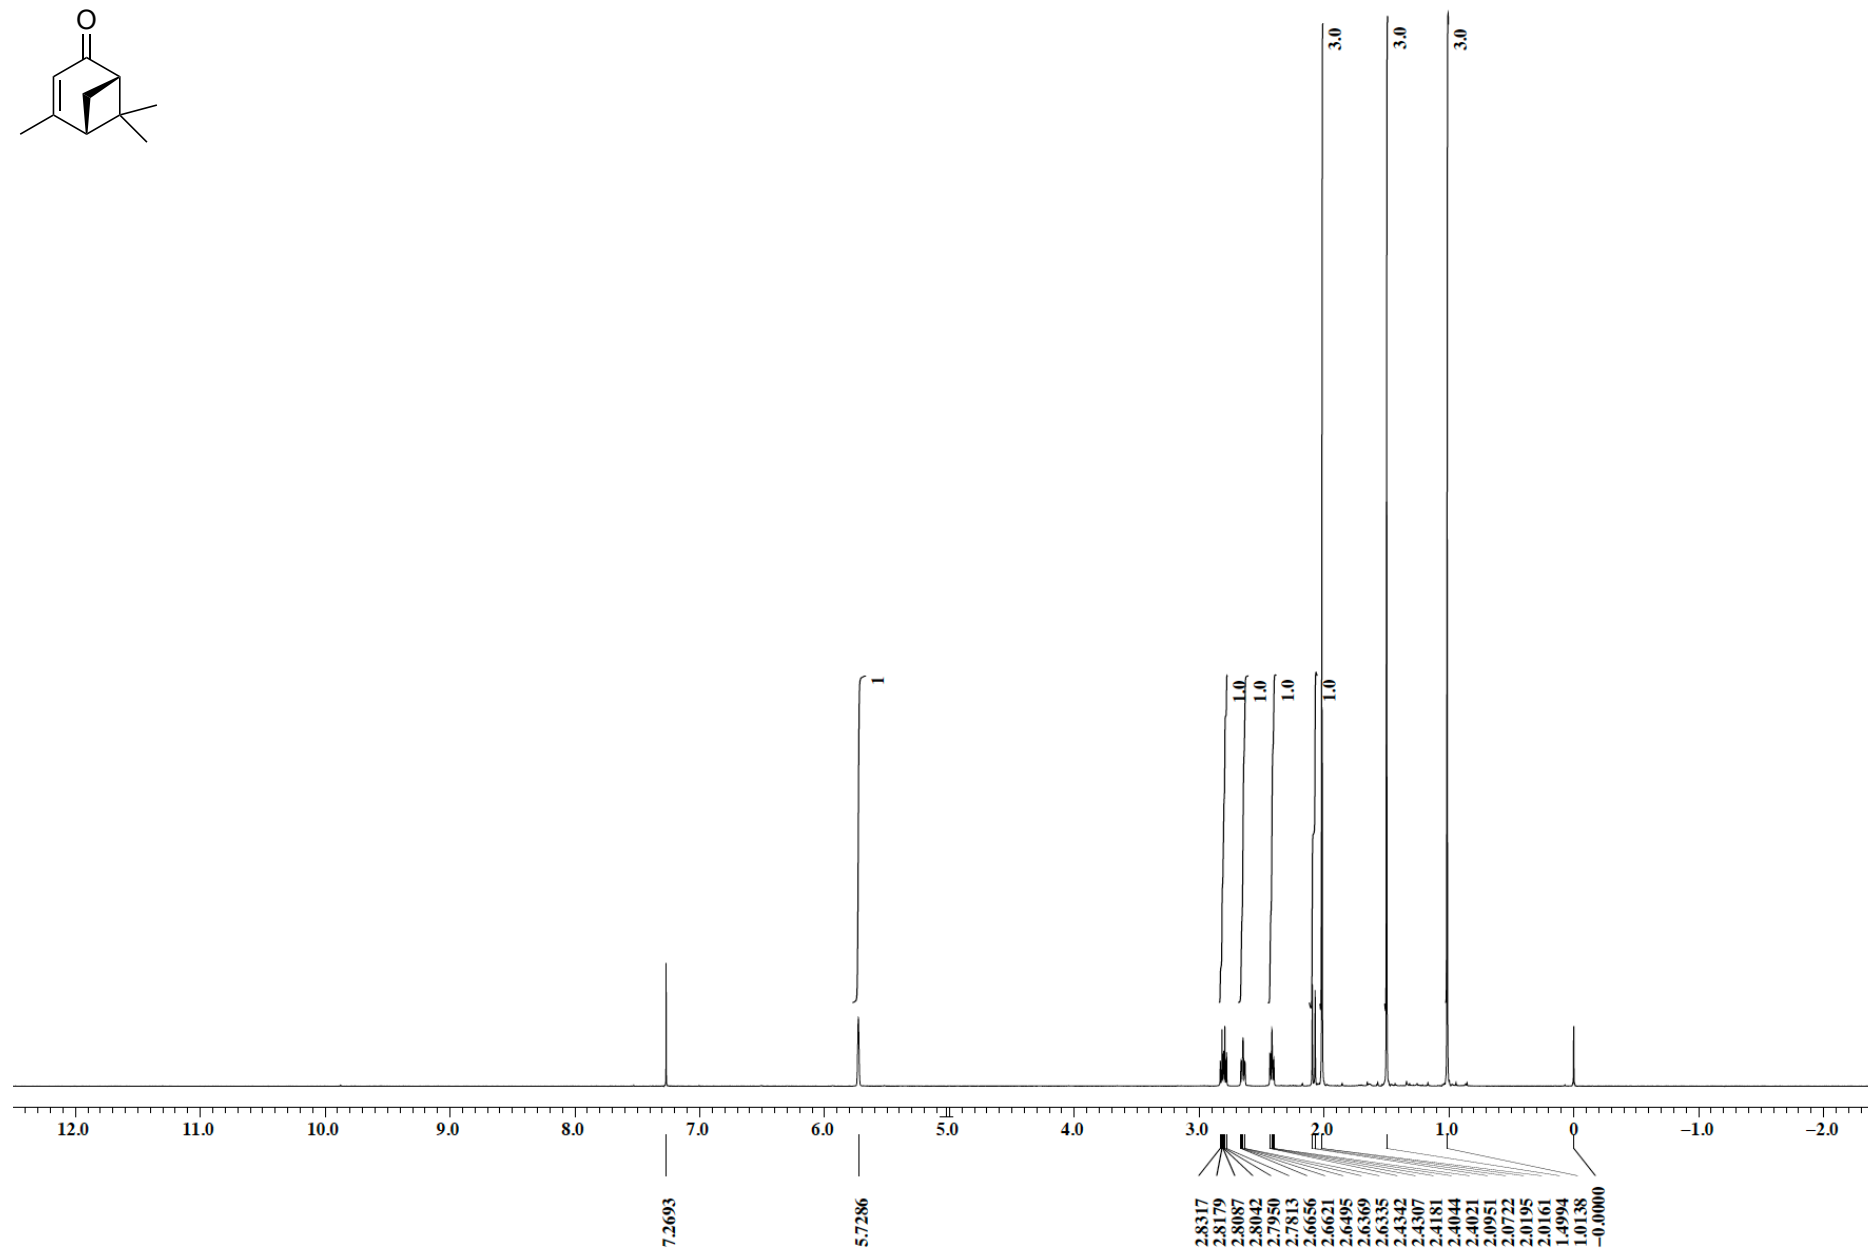

X : parts per Million : 1H

**5m**,  $^{13}\text{C}$  NMR ( $\text{CDCl}_3$ , 100 MHz)

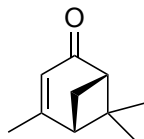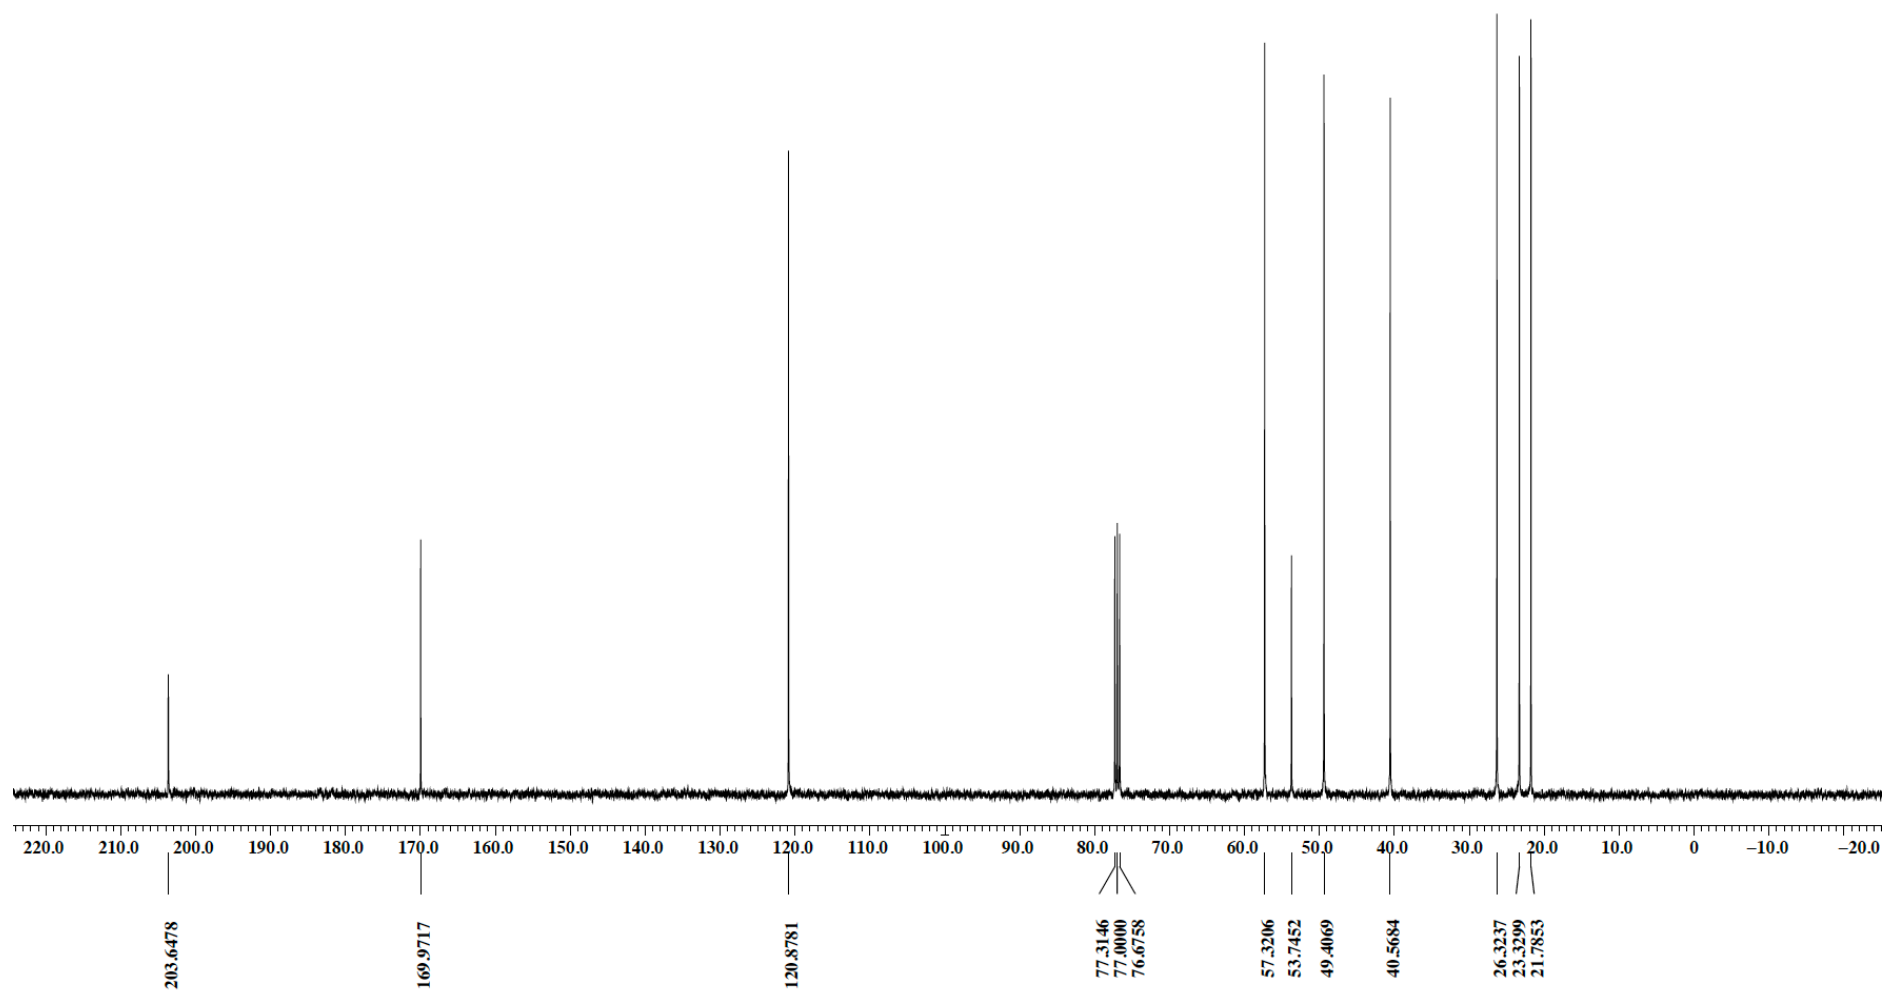

X : parts per Million :  $^{13}\text{C}$

**5n**,  $^1\text{H}$  NMR ( $\text{CDCl}_3$ , 400 MHz)

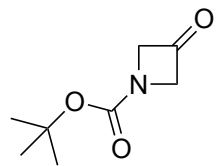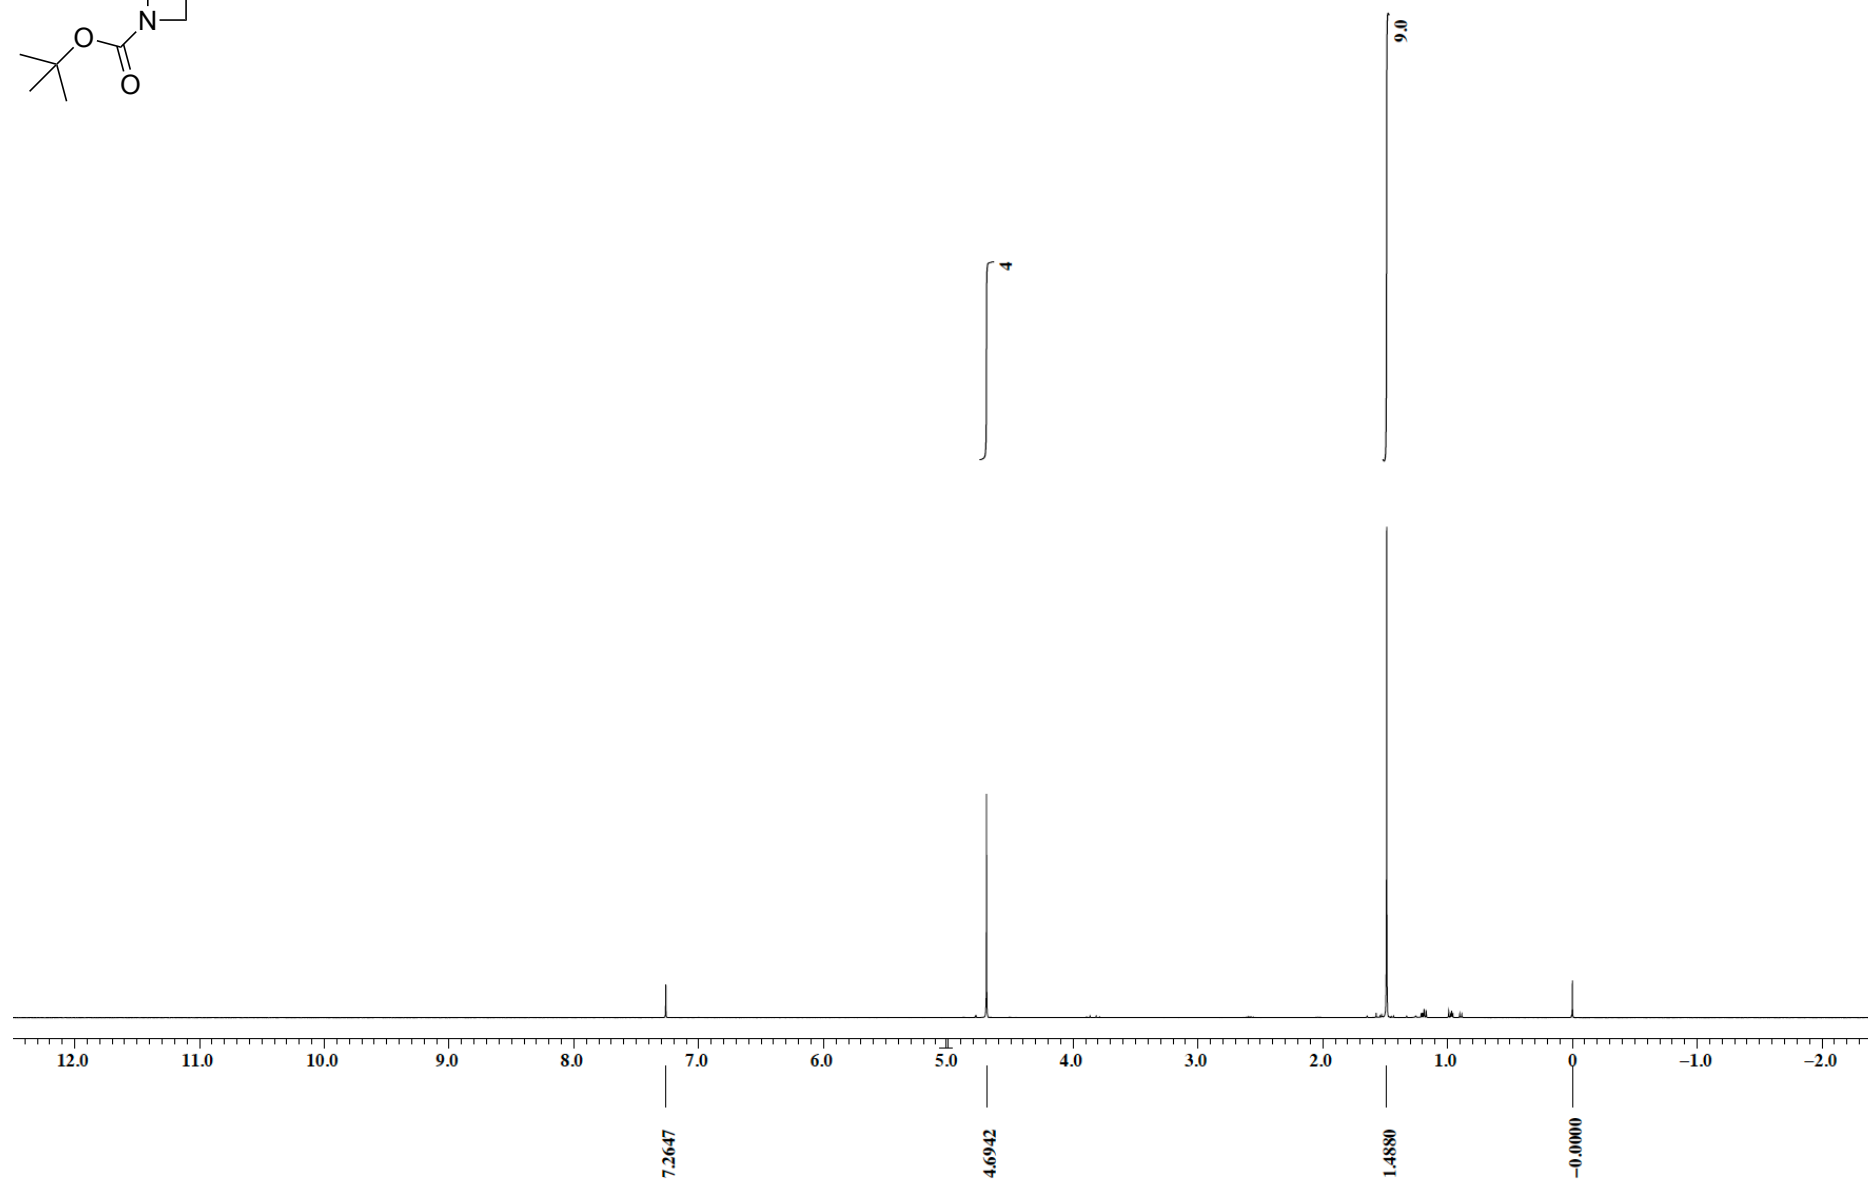

X : parts per Million :  $^1\text{H}$

**5n**,  $^{13}\text{C}$  NMR ( $\text{CDCl}_3$ , 100 MHz)

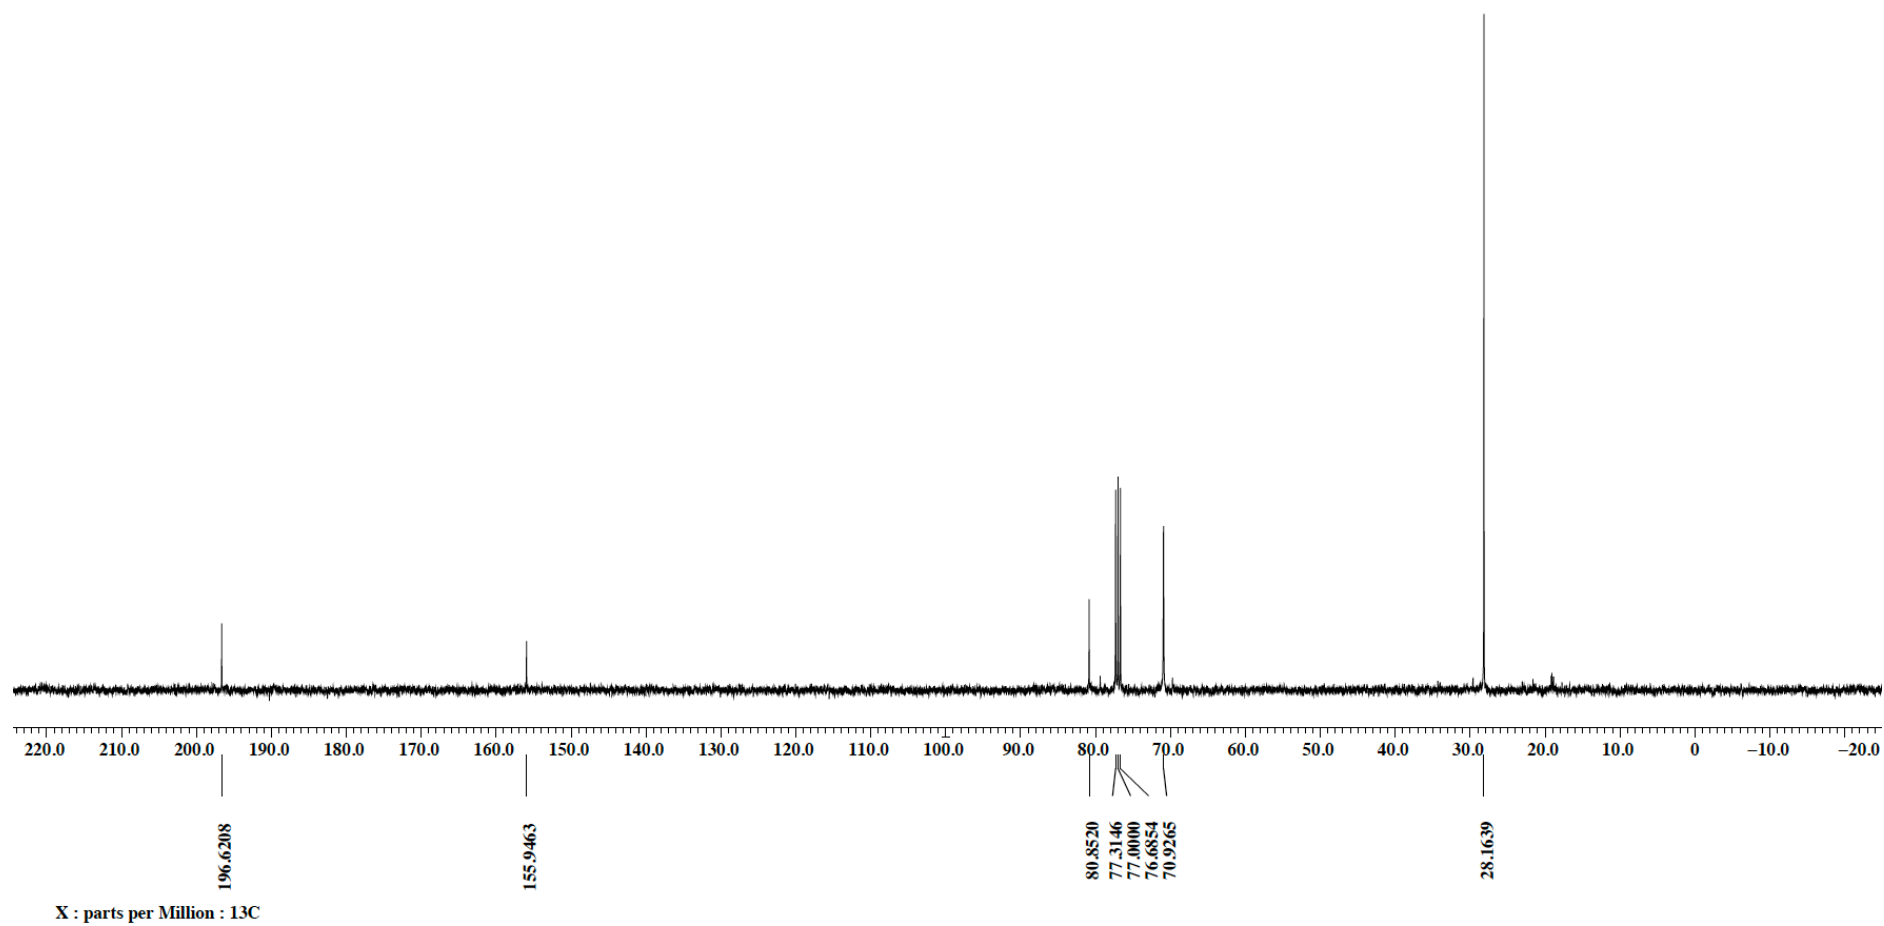

**50**,  $^1\text{H}$  NMR ( $\text{CDCl}_3$ , 400 MHz)

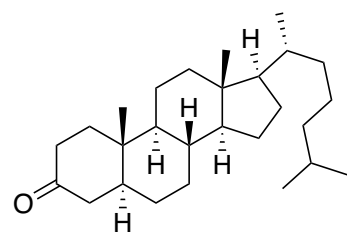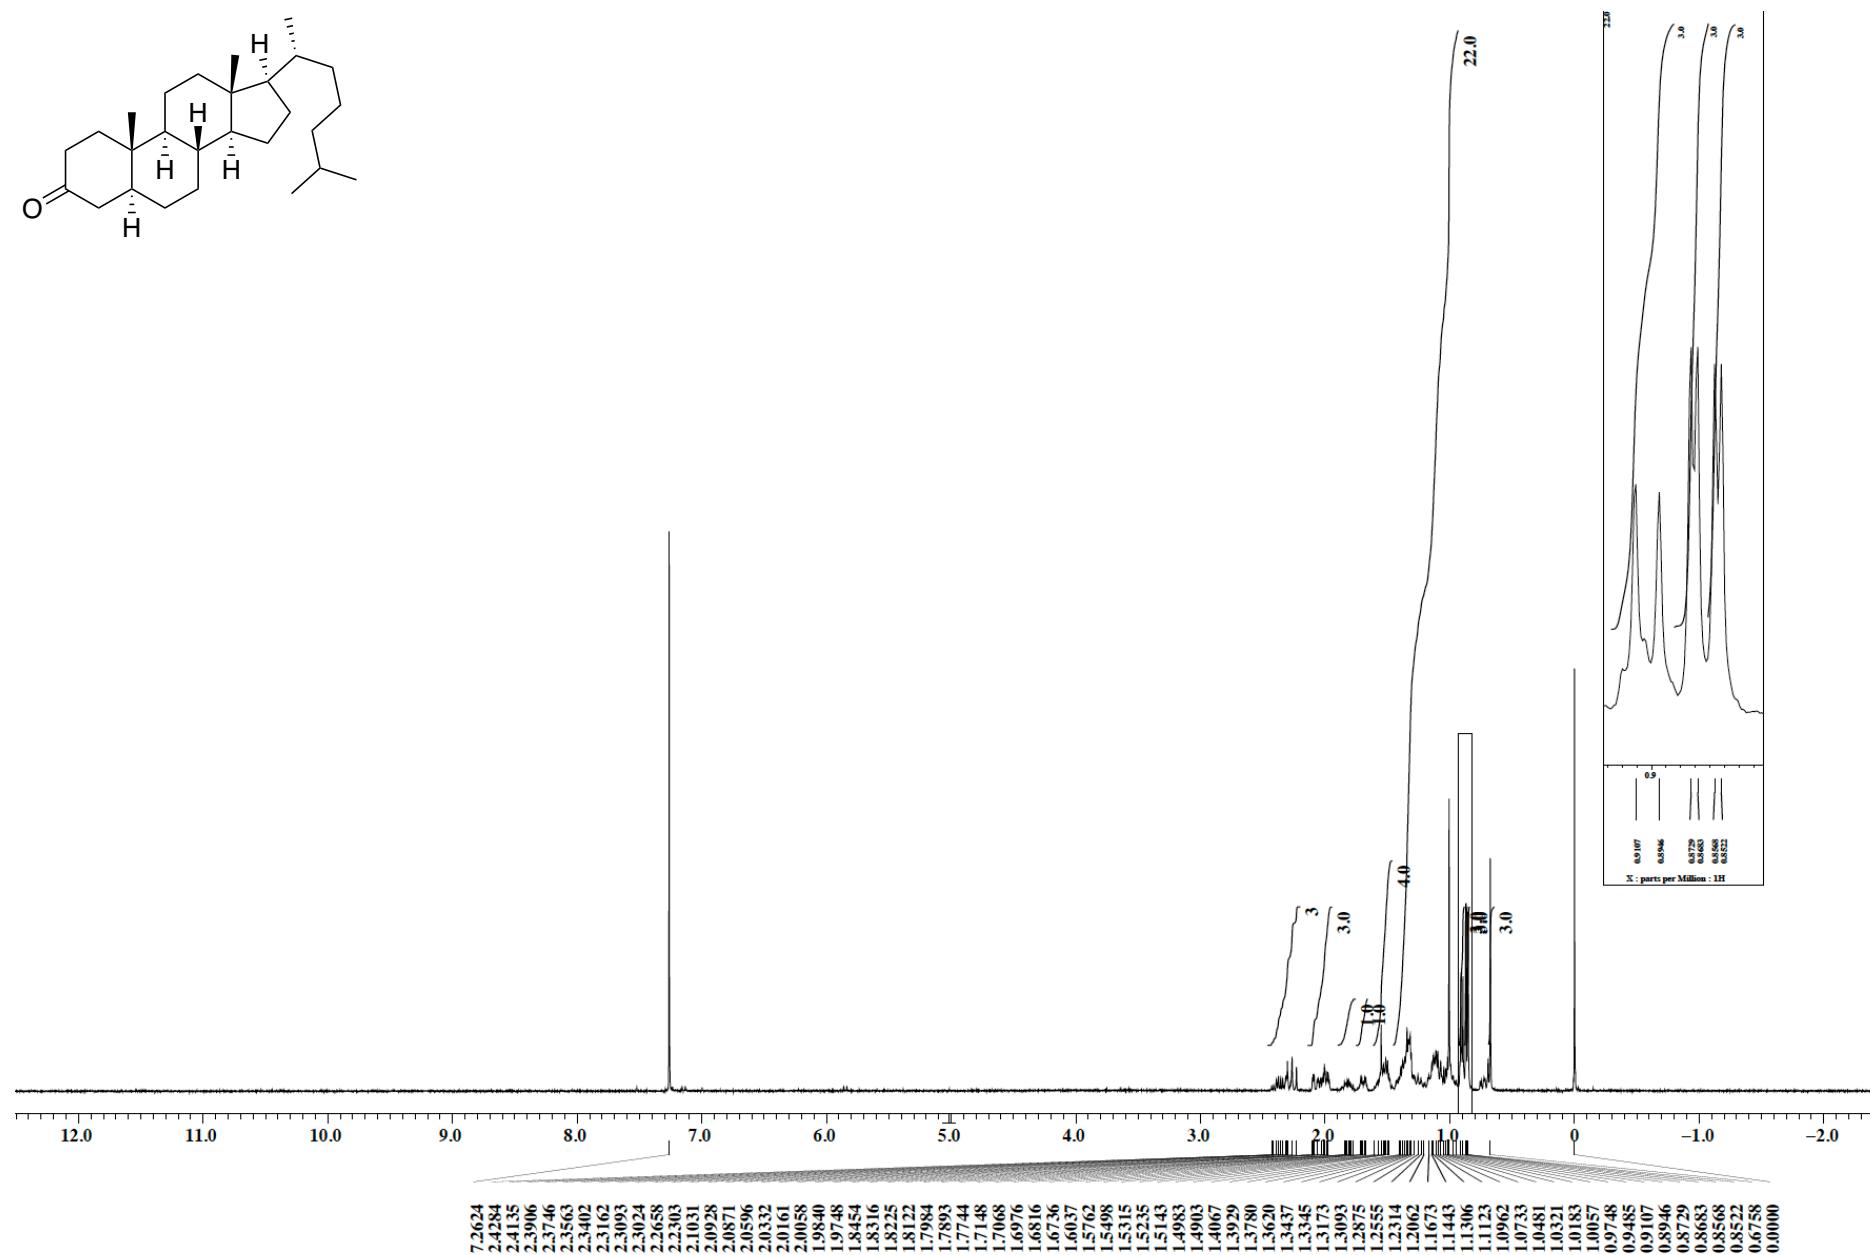

X : parts per Million : 1H

**50**,  $^{13}\text{C}$  NMR ( $\text{CDCl}_3$ , 100 MHz)

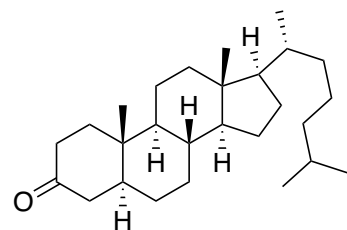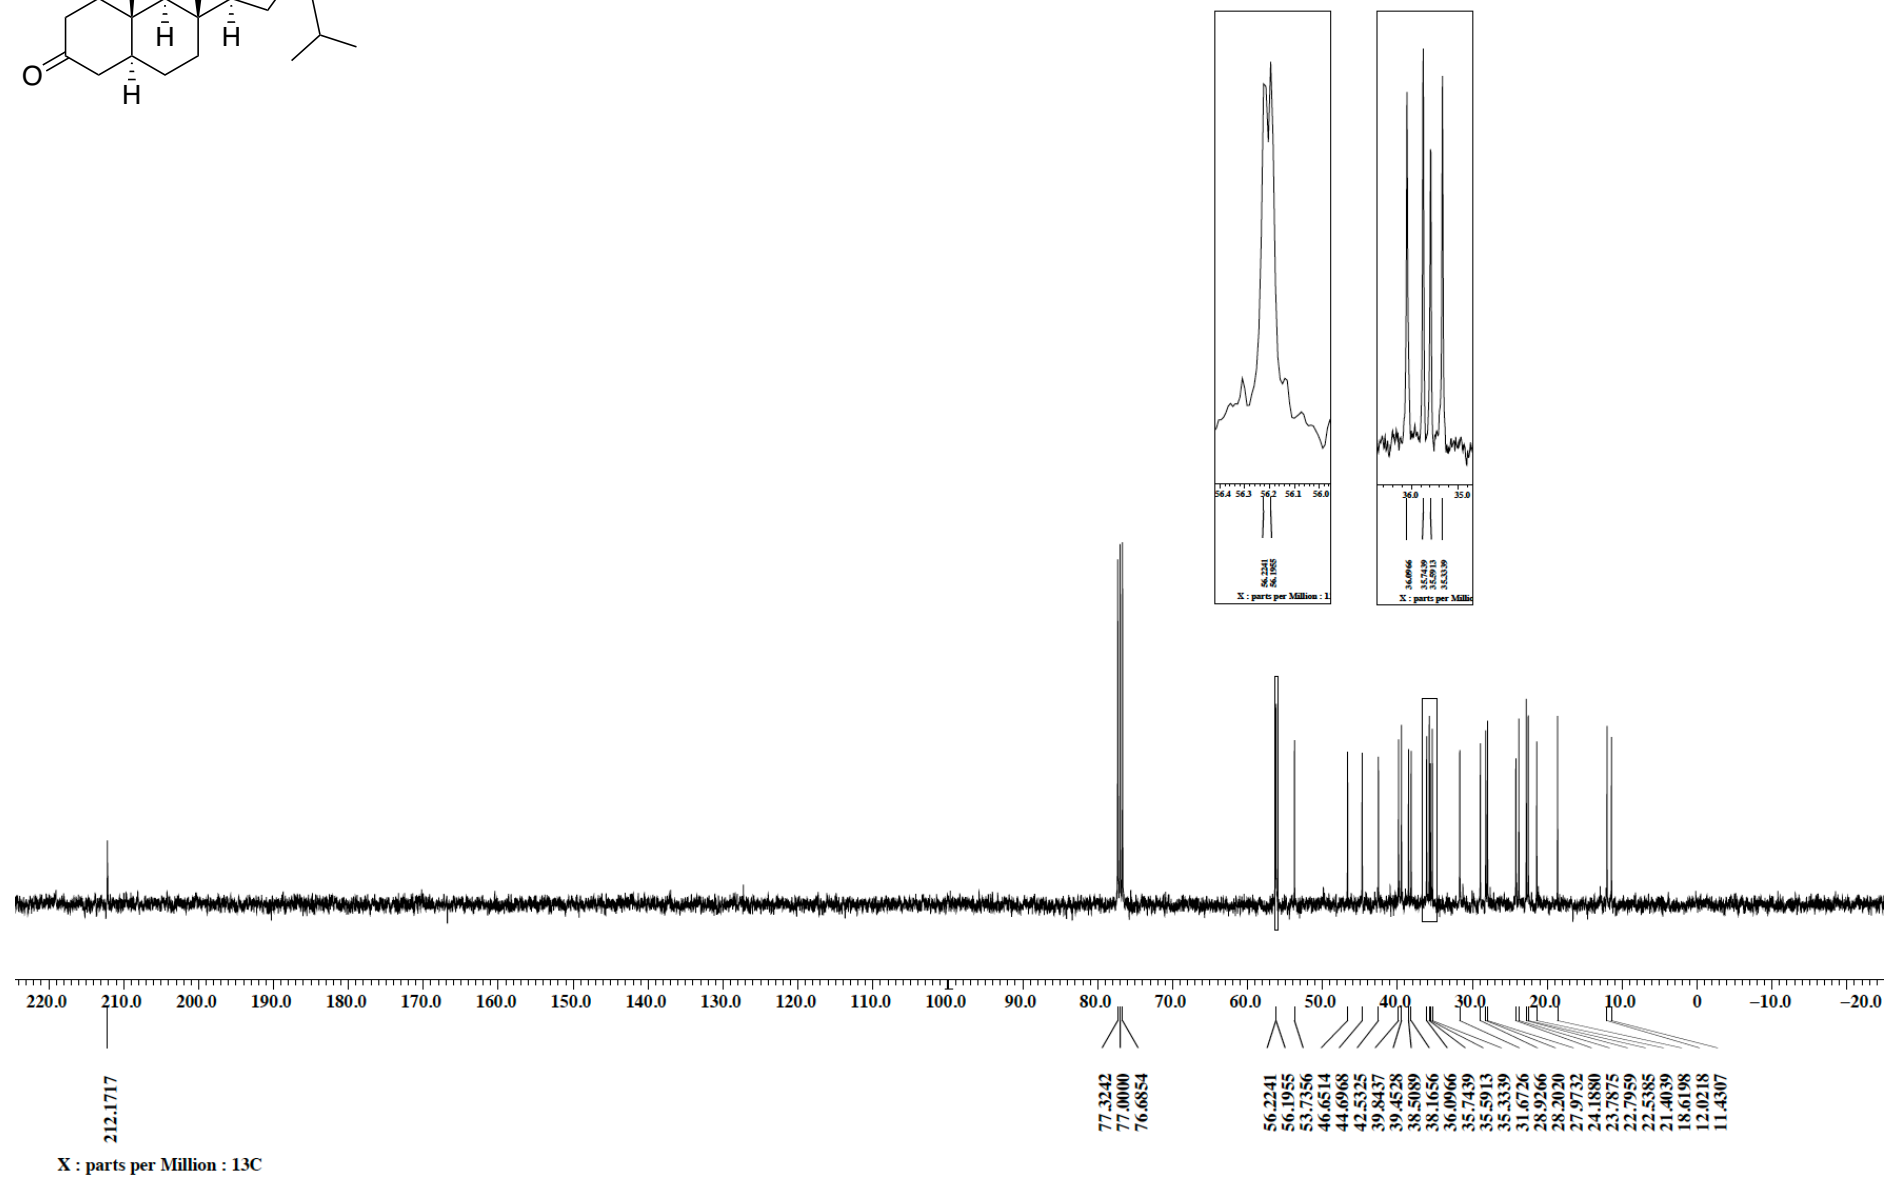

7,  $^1\text{H}$  NMR ( $\text{CDCl}_3$ , 400 MHz)

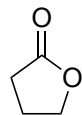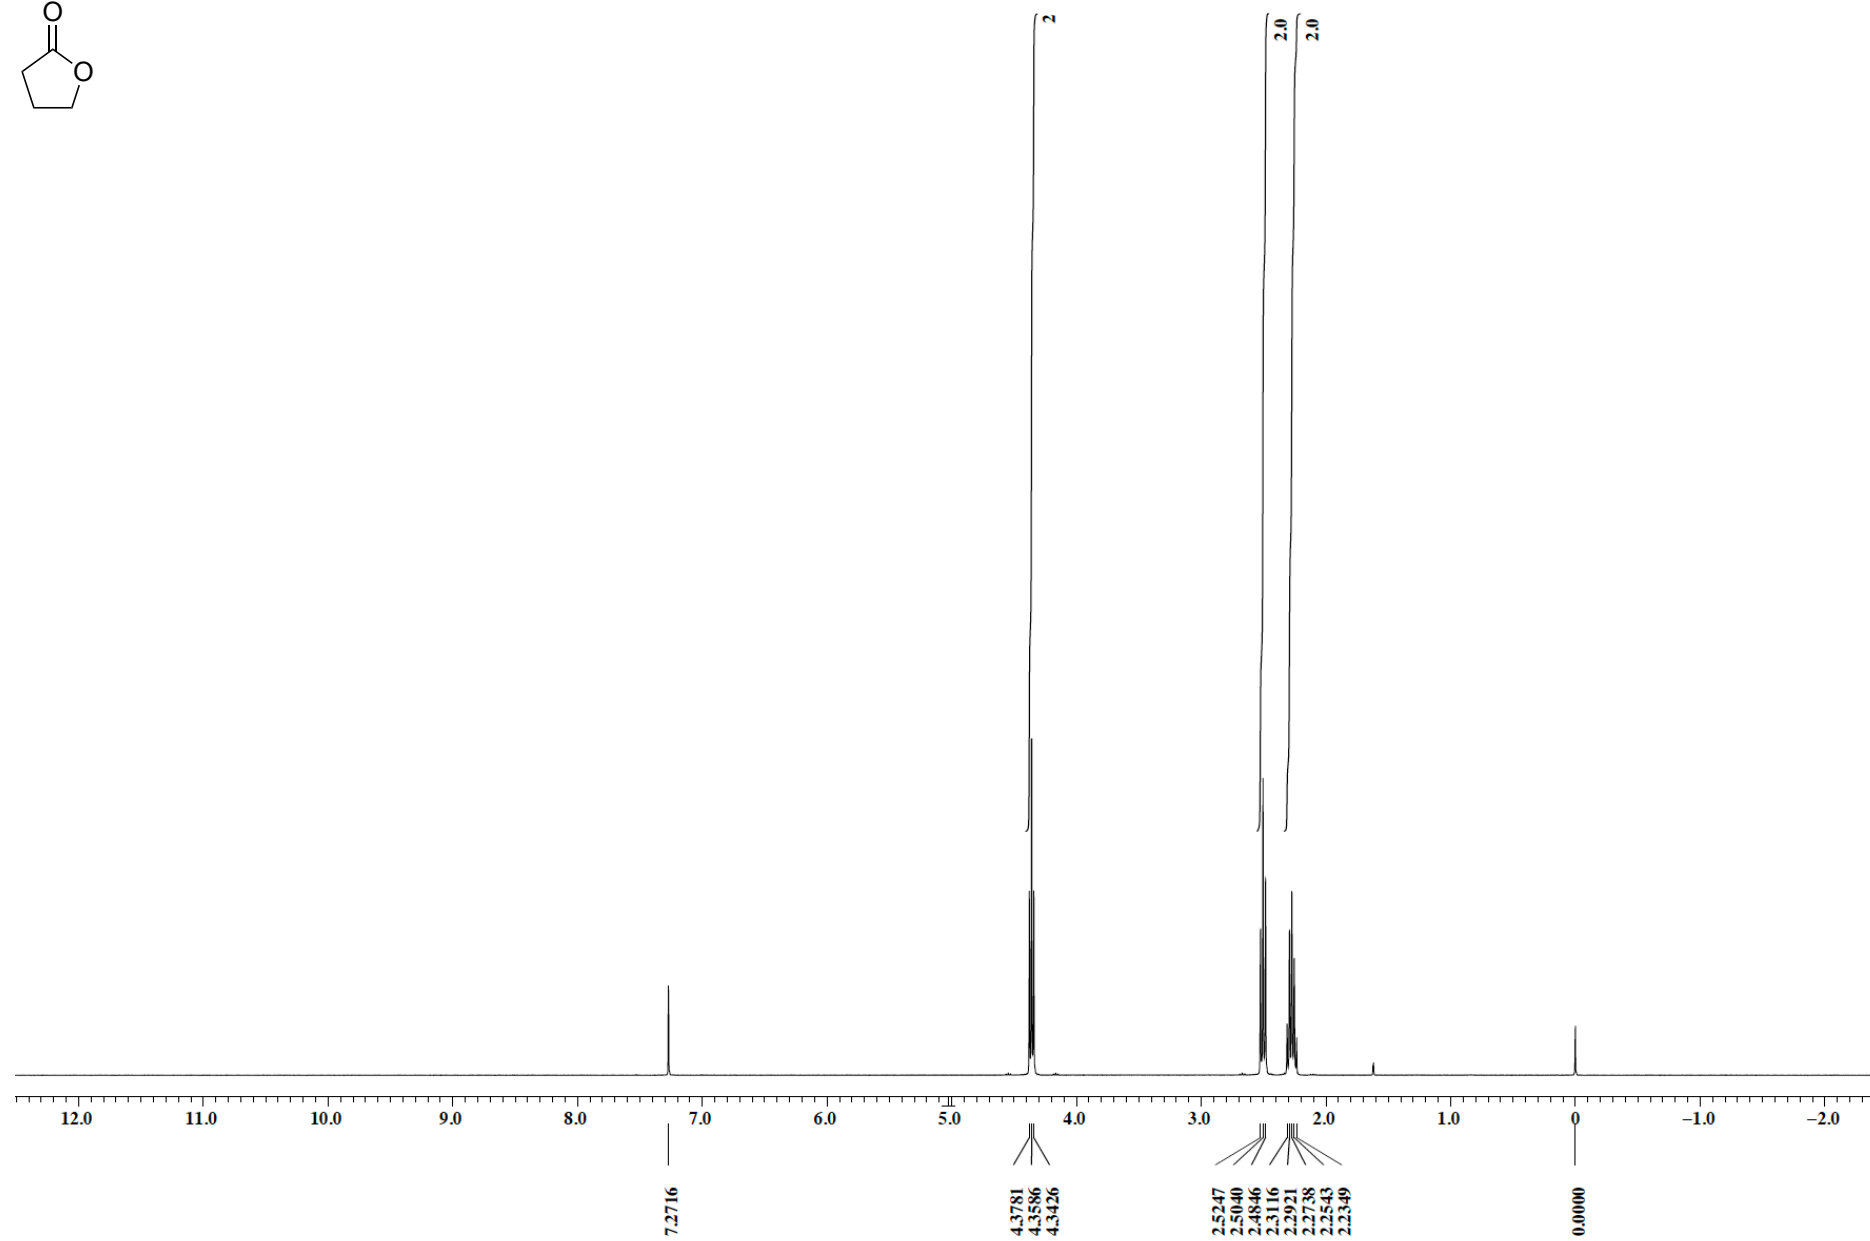

X : parts per Million :  $^1\text{H}$

7,  $^{13}\text{C}$  NMR ( $\text{CDCl}_3$ , 100 MHz)

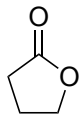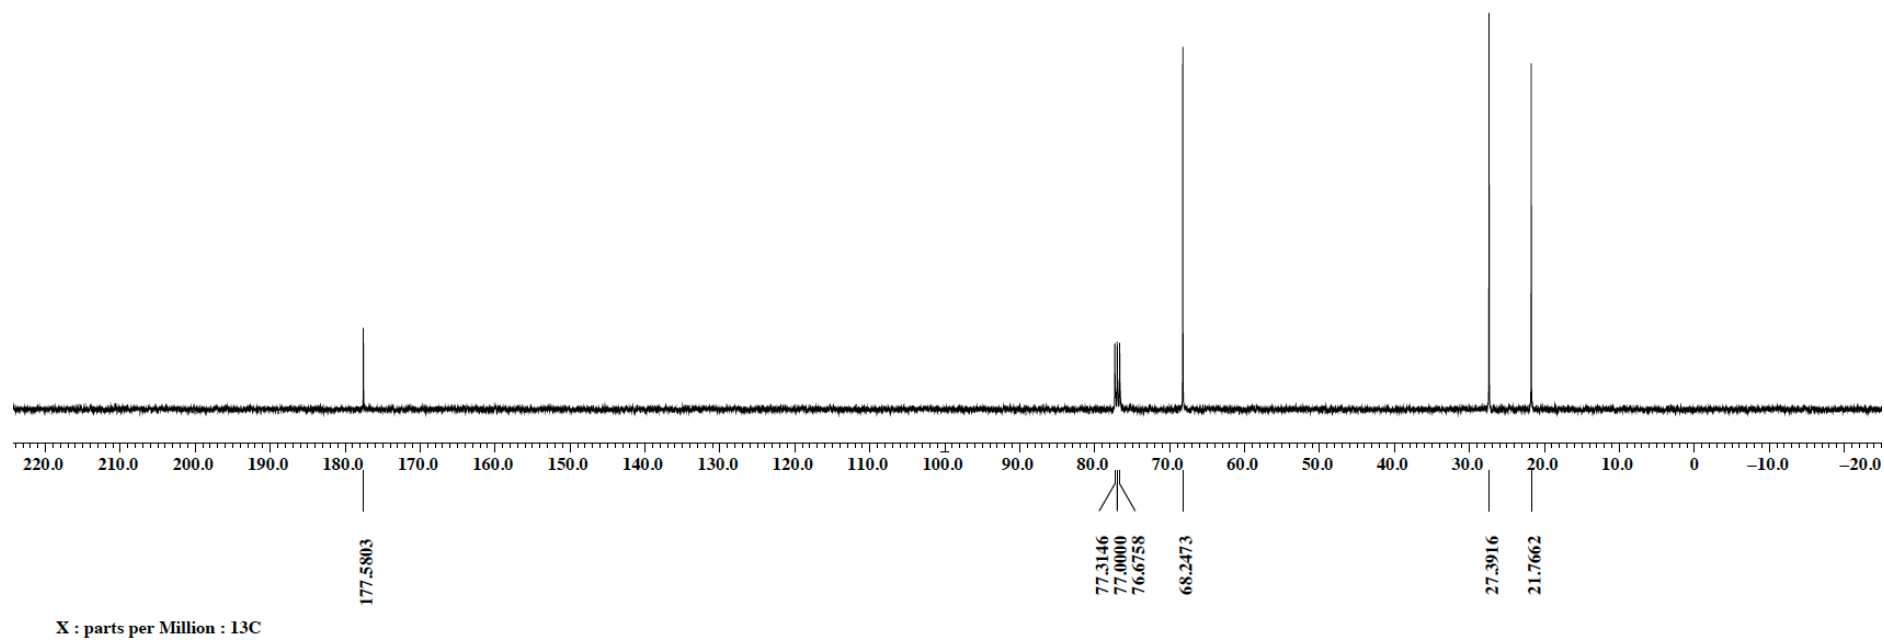



**9pa**,  $^1\text{H}$  NMR ( $\text{CDCl}_3$ , 400 MHz)

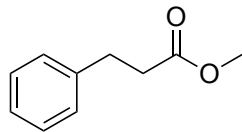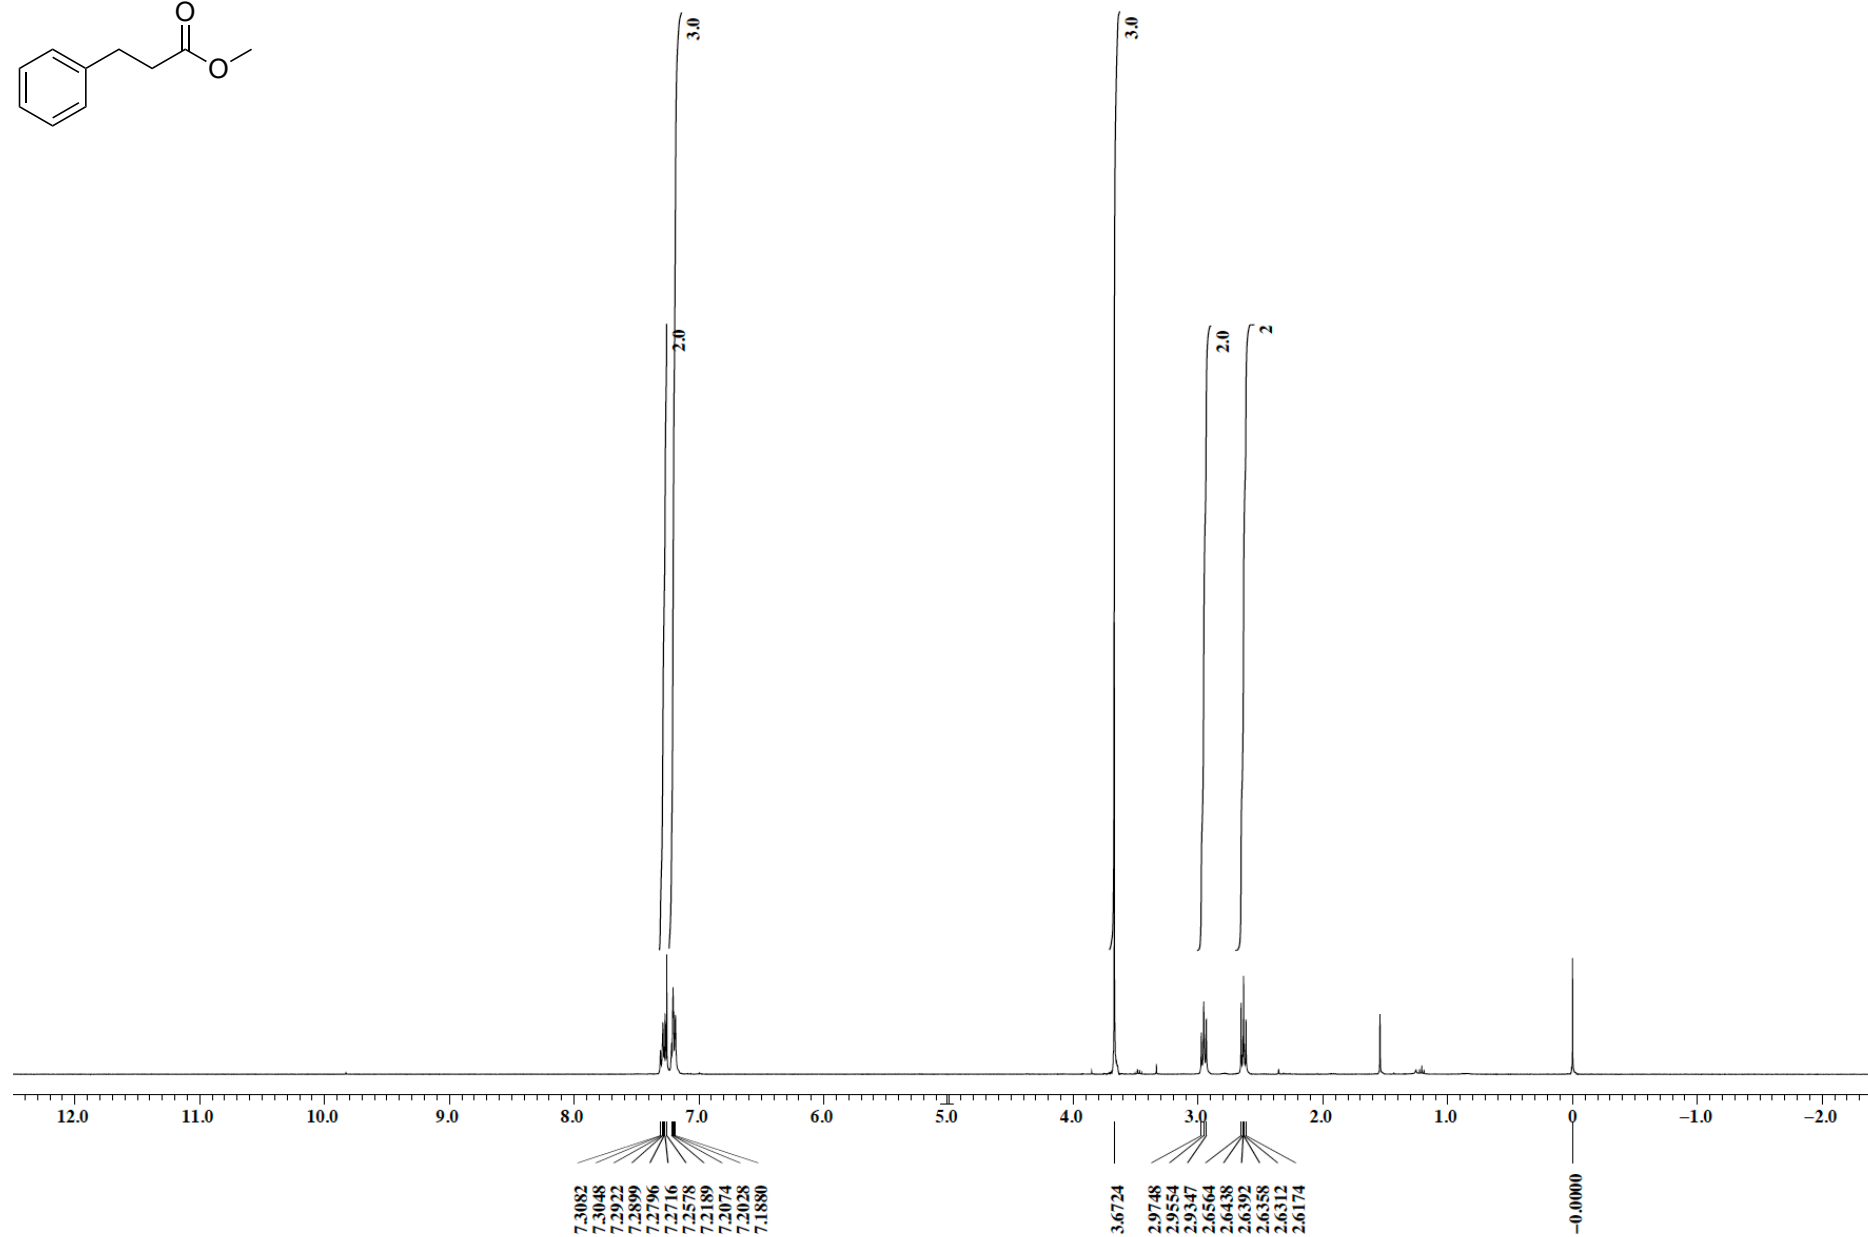

X : parts per Million :  $^1\text{H}$

**9pa**,  $^{13}\text{C}$  NMR ( $\text{CDCl}_3$ , 100 MHz)

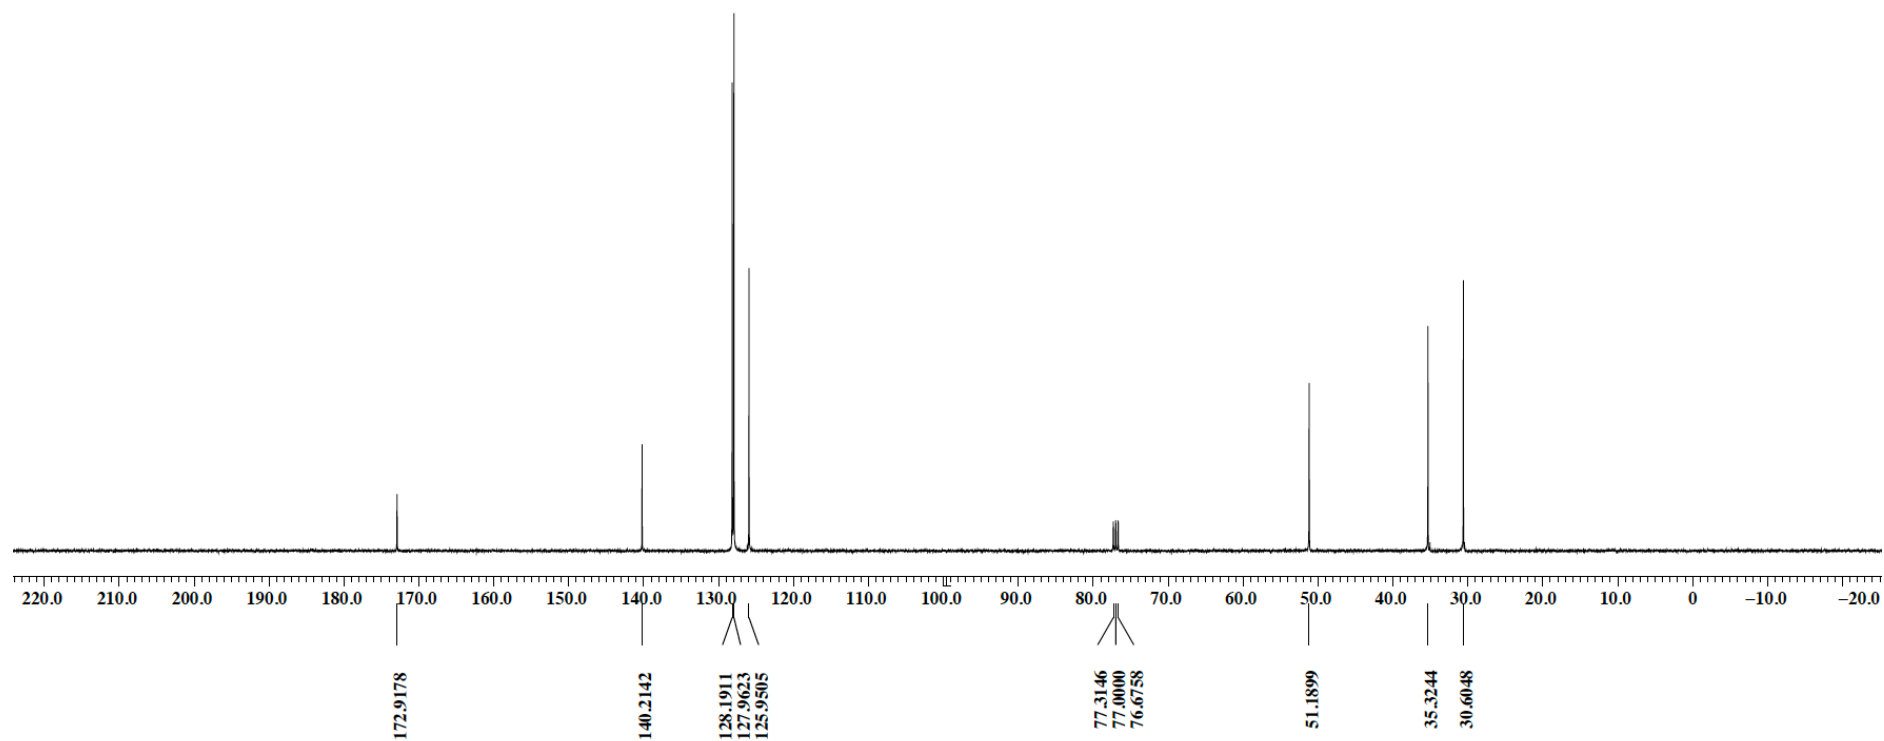

X : parts per Million :  $^{13}\text{C}$

**9pb**,  $^1\text{H}$  NMR ( $\text{CDCl}_3$ , 400 MHz)

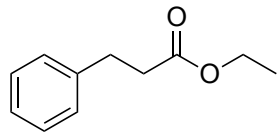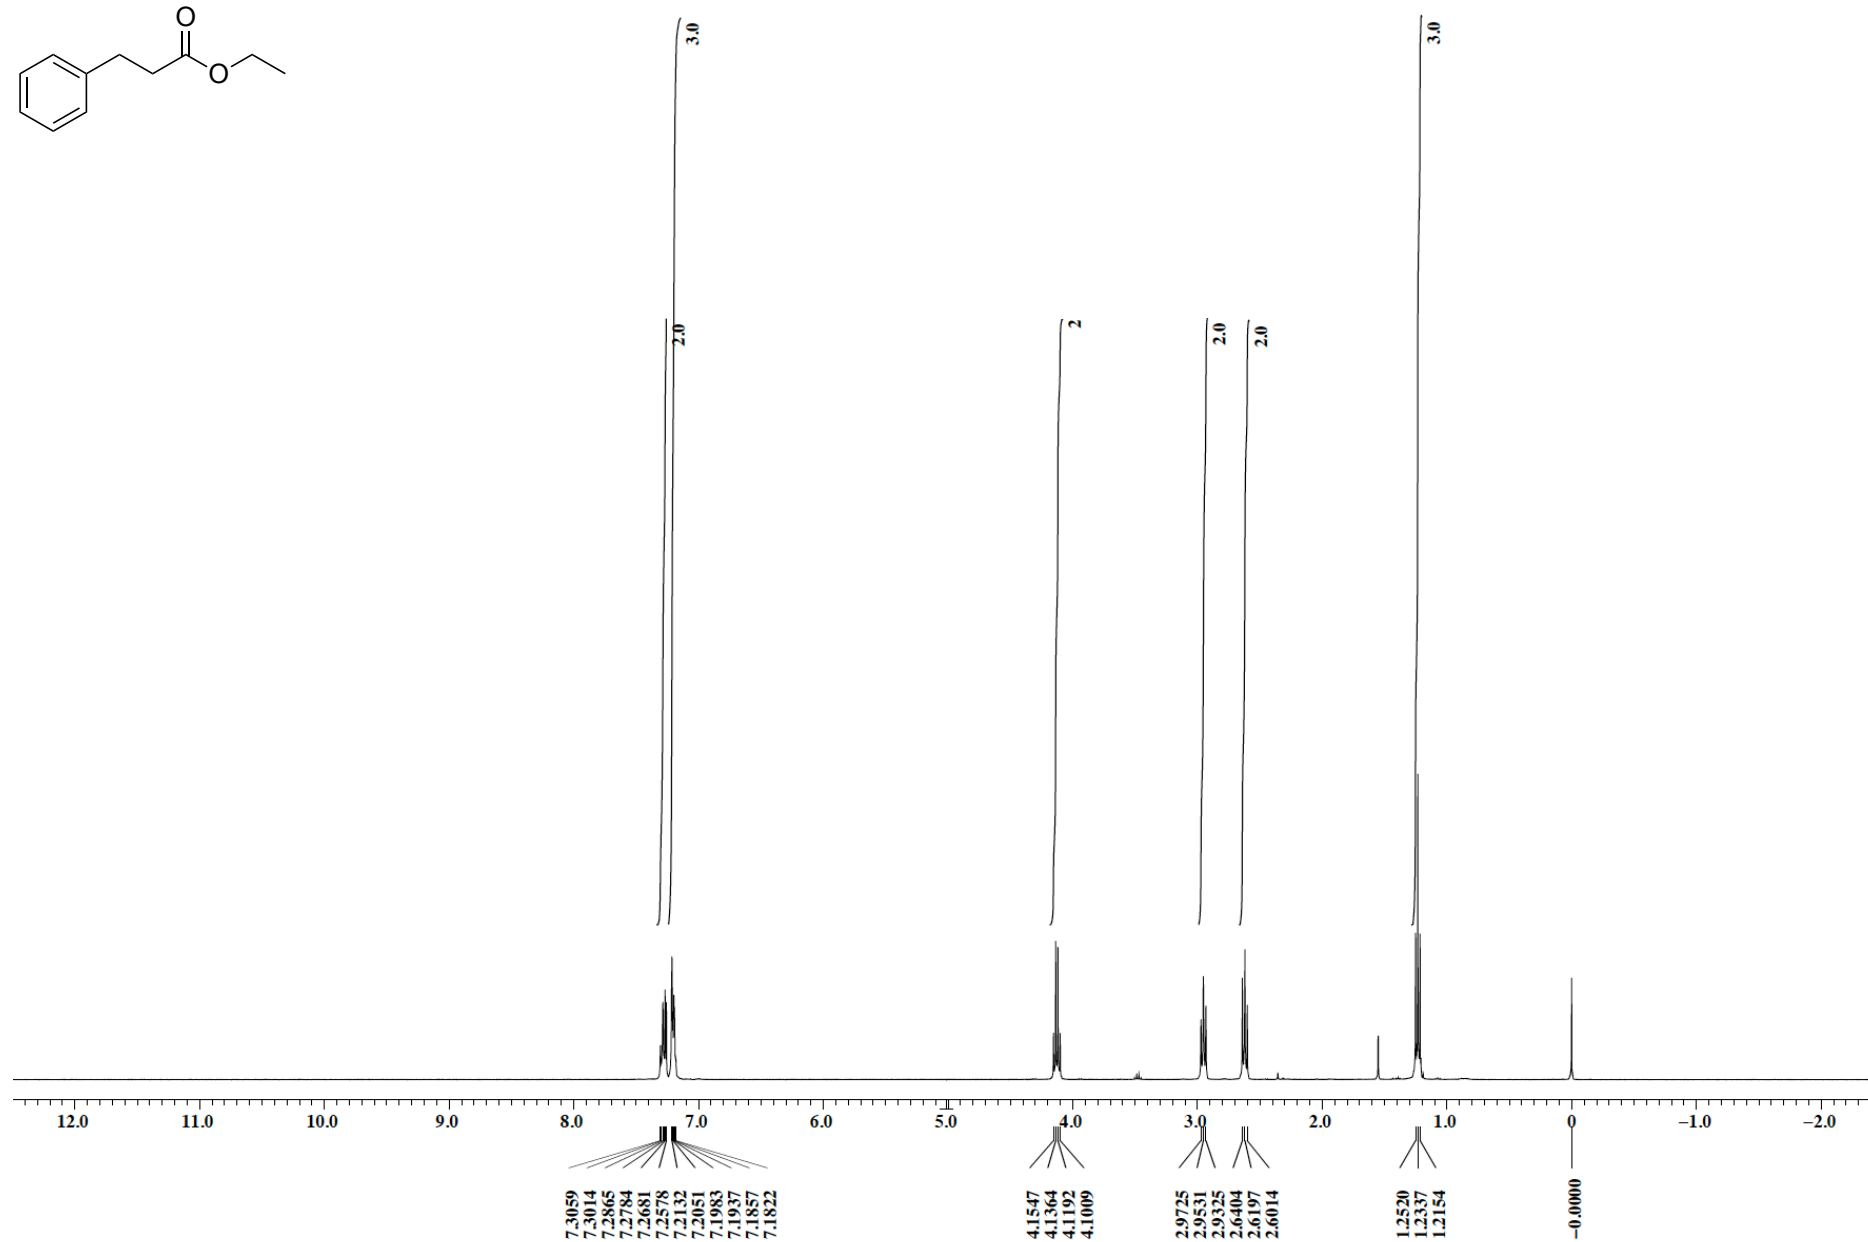

X : parts per Million :  $^1\text{H}$

**9pb**,  $^{13}\text{C}$  NMR ( $\text{CDCl}_3$ , 100 MHz)

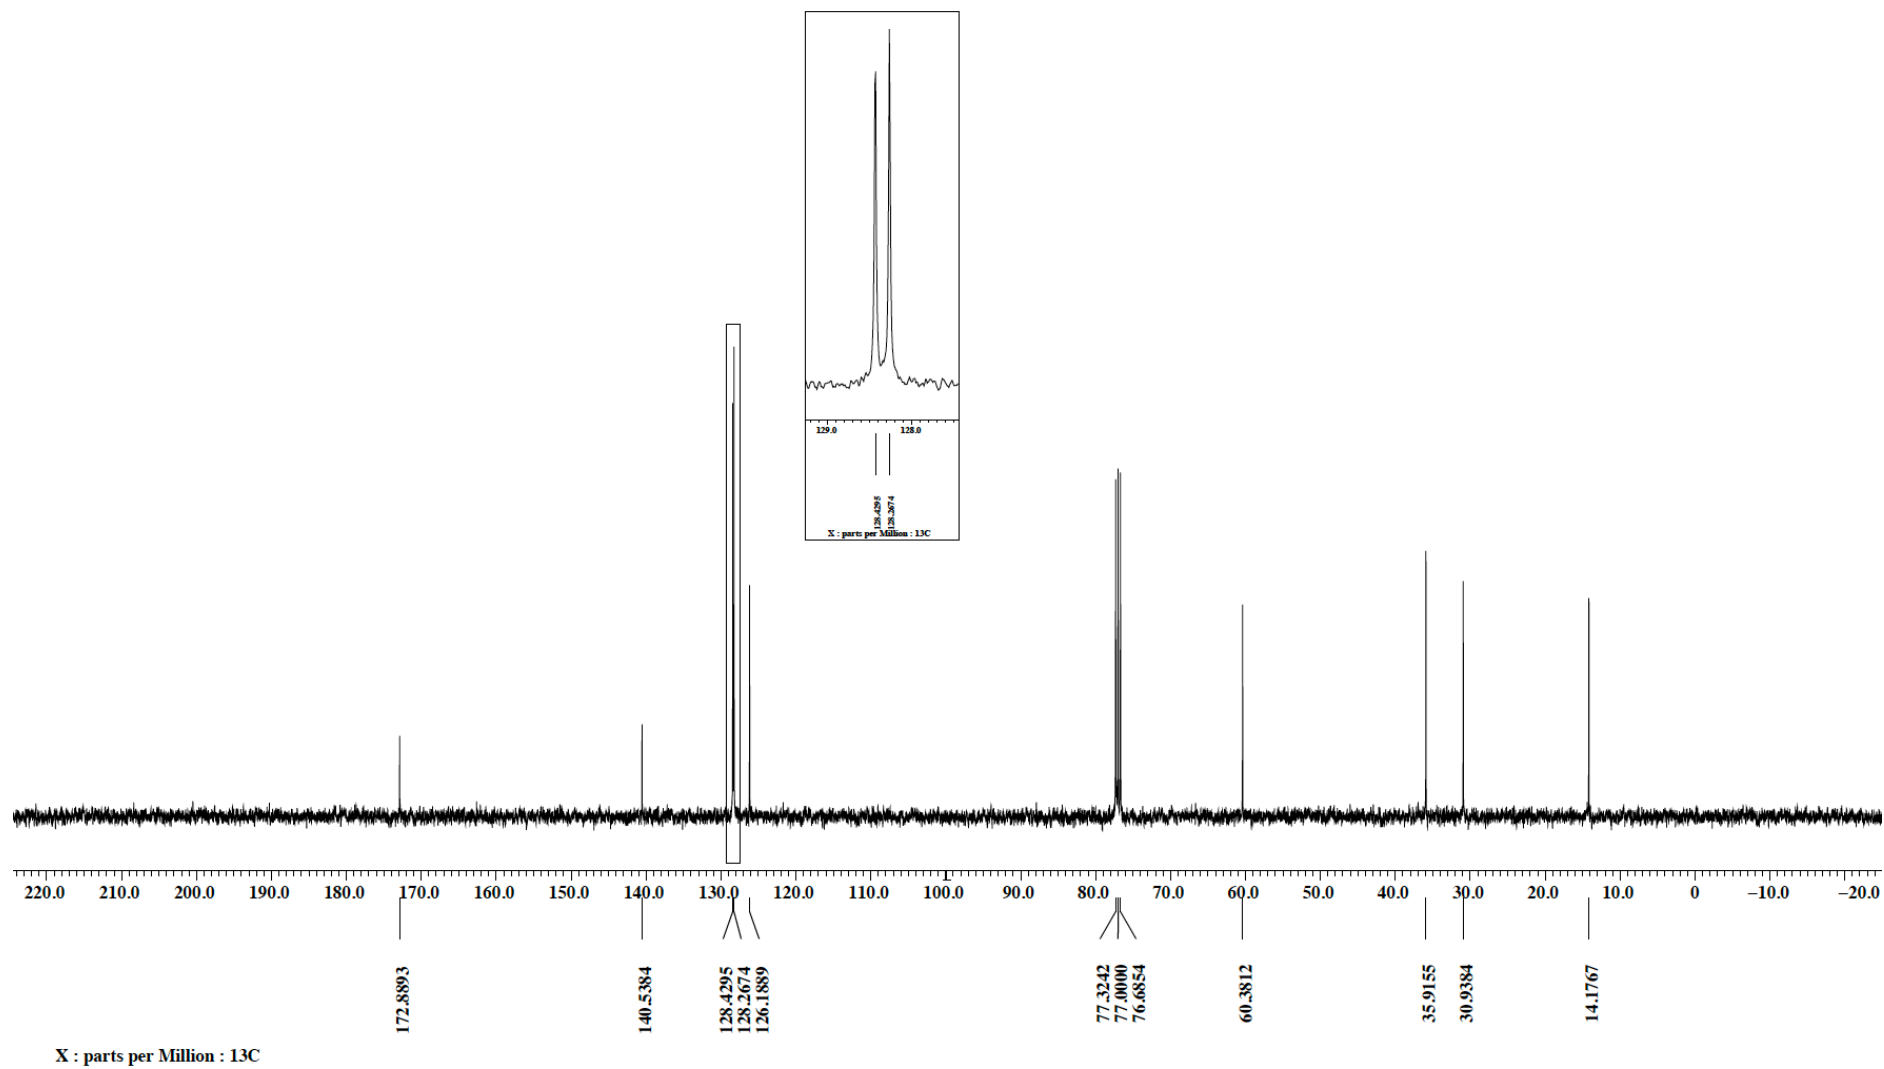

**9pc**,  $^1\text{H}$  NMR ( $\text{CDCl}_3$ , 400 MHz)

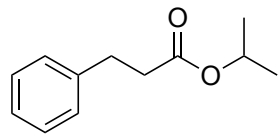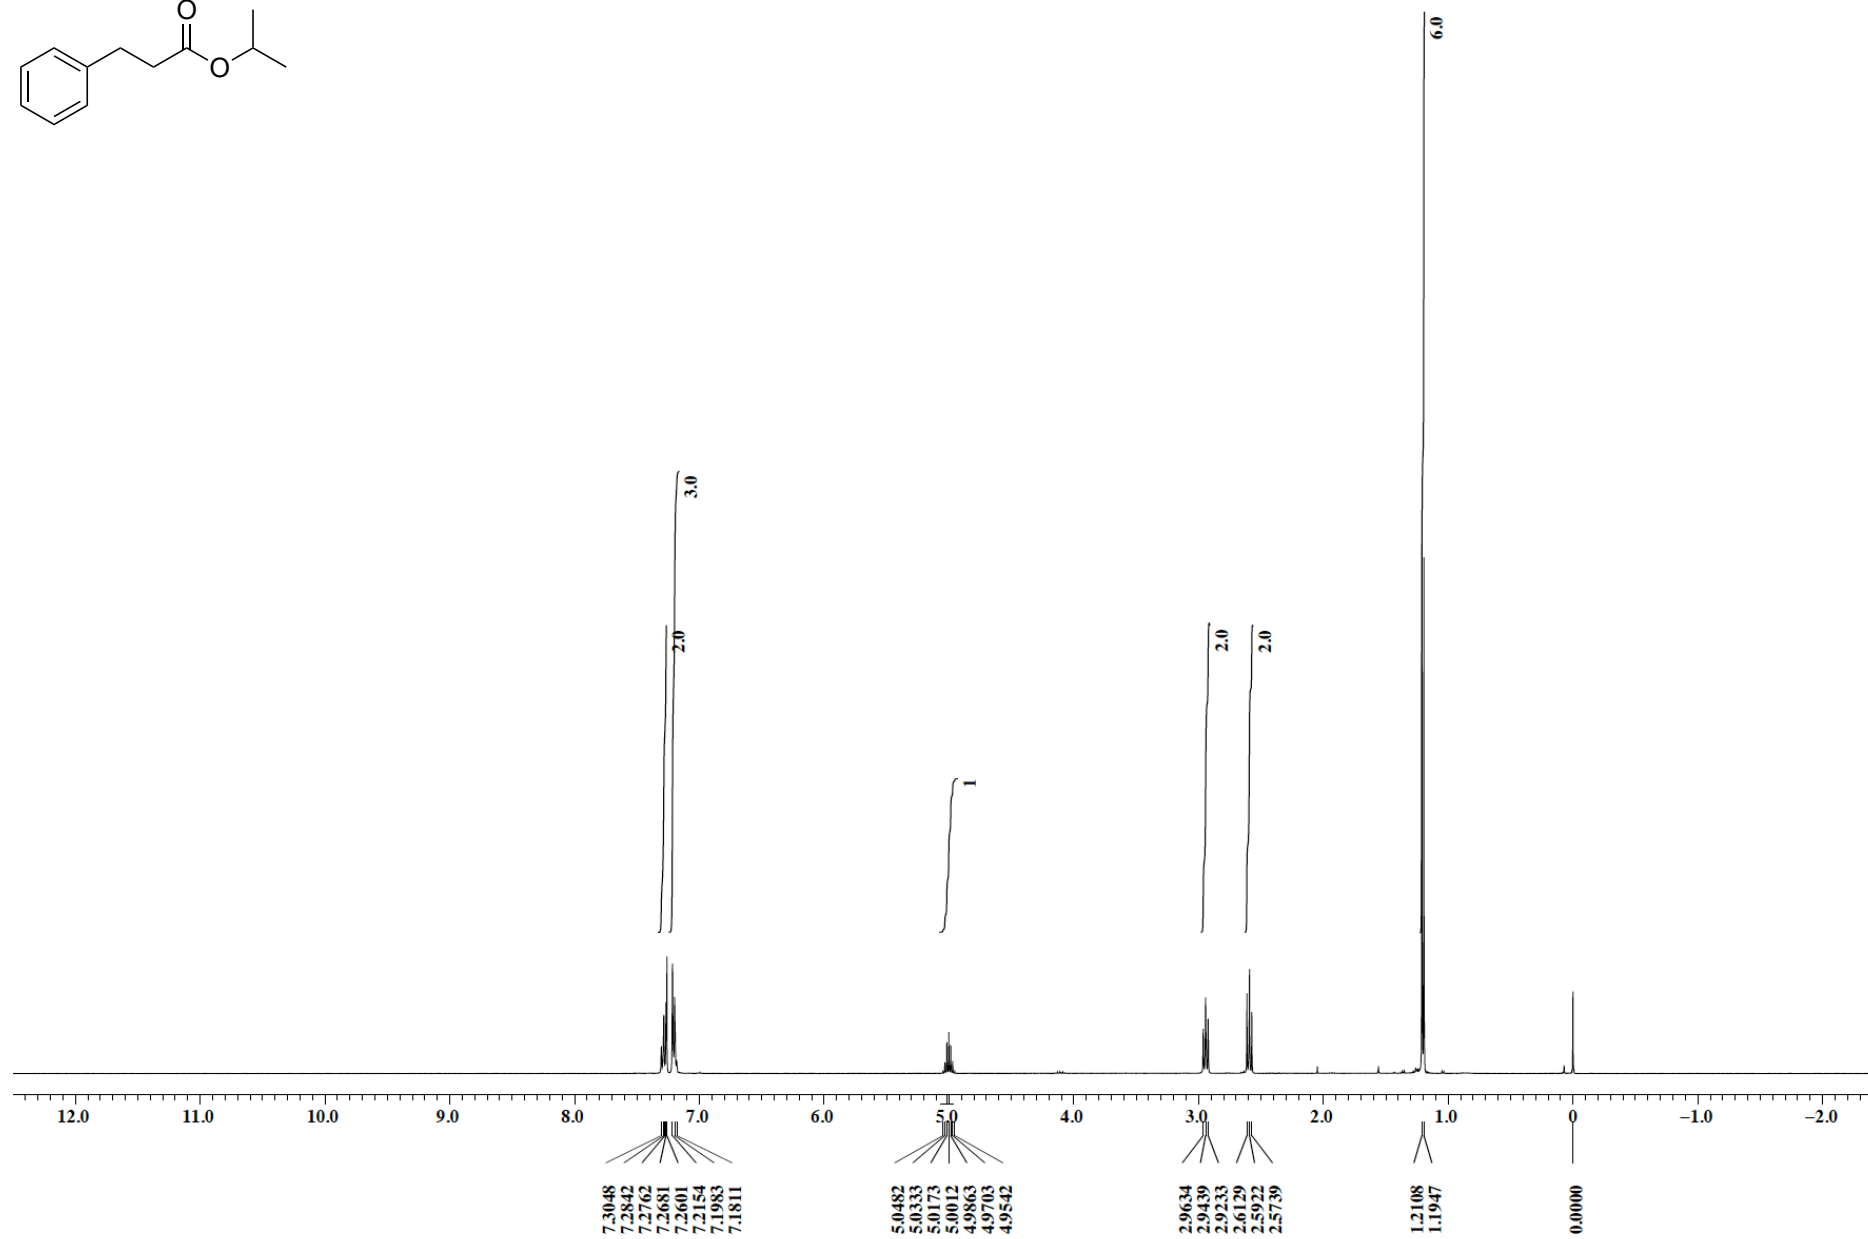

X : parts per Million : 1H

**9pc**,  $^{13}\text{C}$  NMR ( $\text{CDCl}_3$ , 100 MHz)

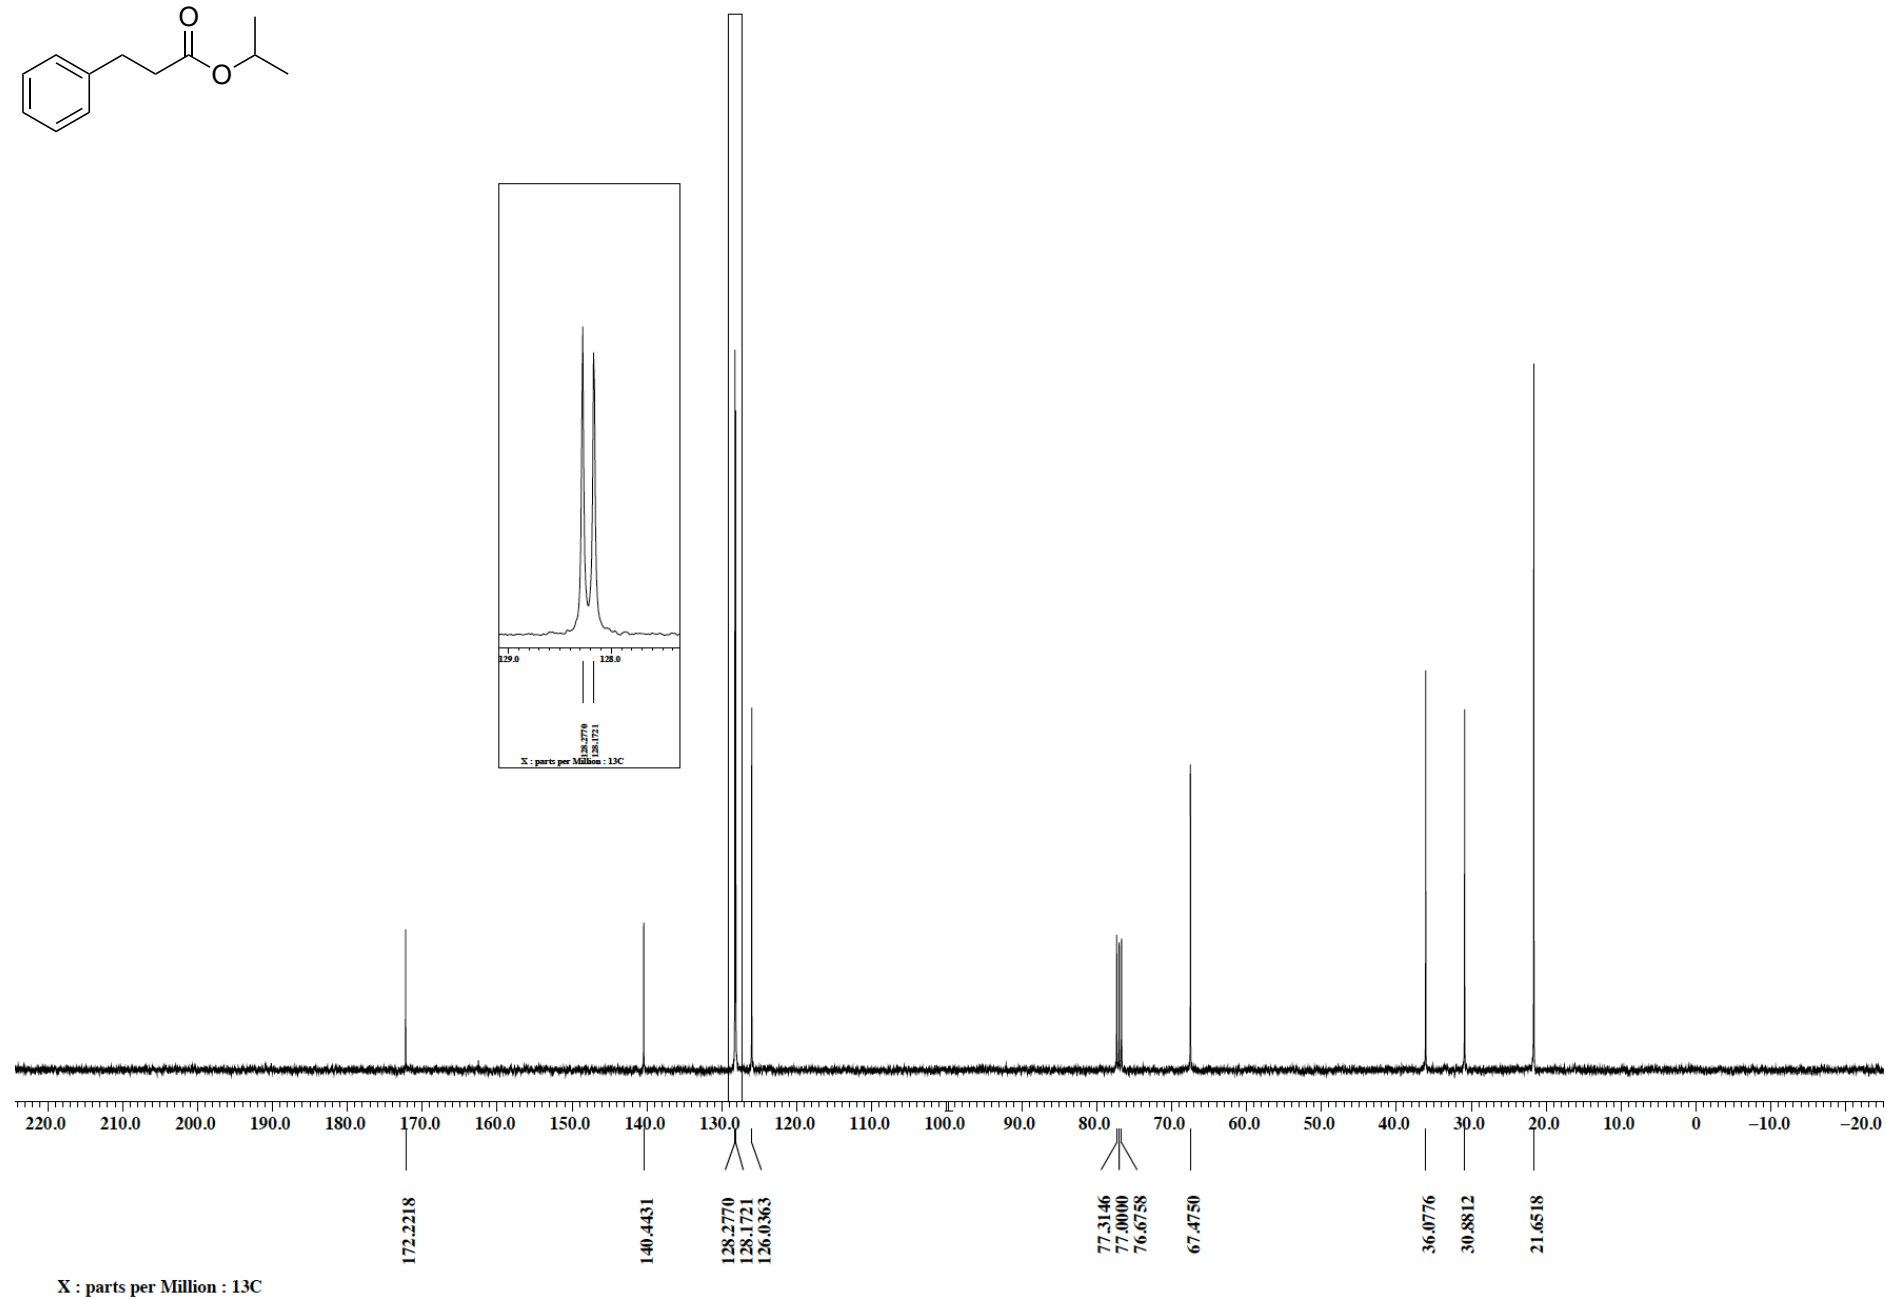

**9qb**,  $^1\text{H}$  NMR ( $\text{CDCl}_3$ , 400 MHz)

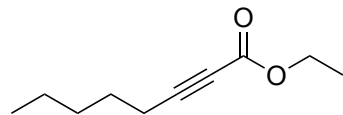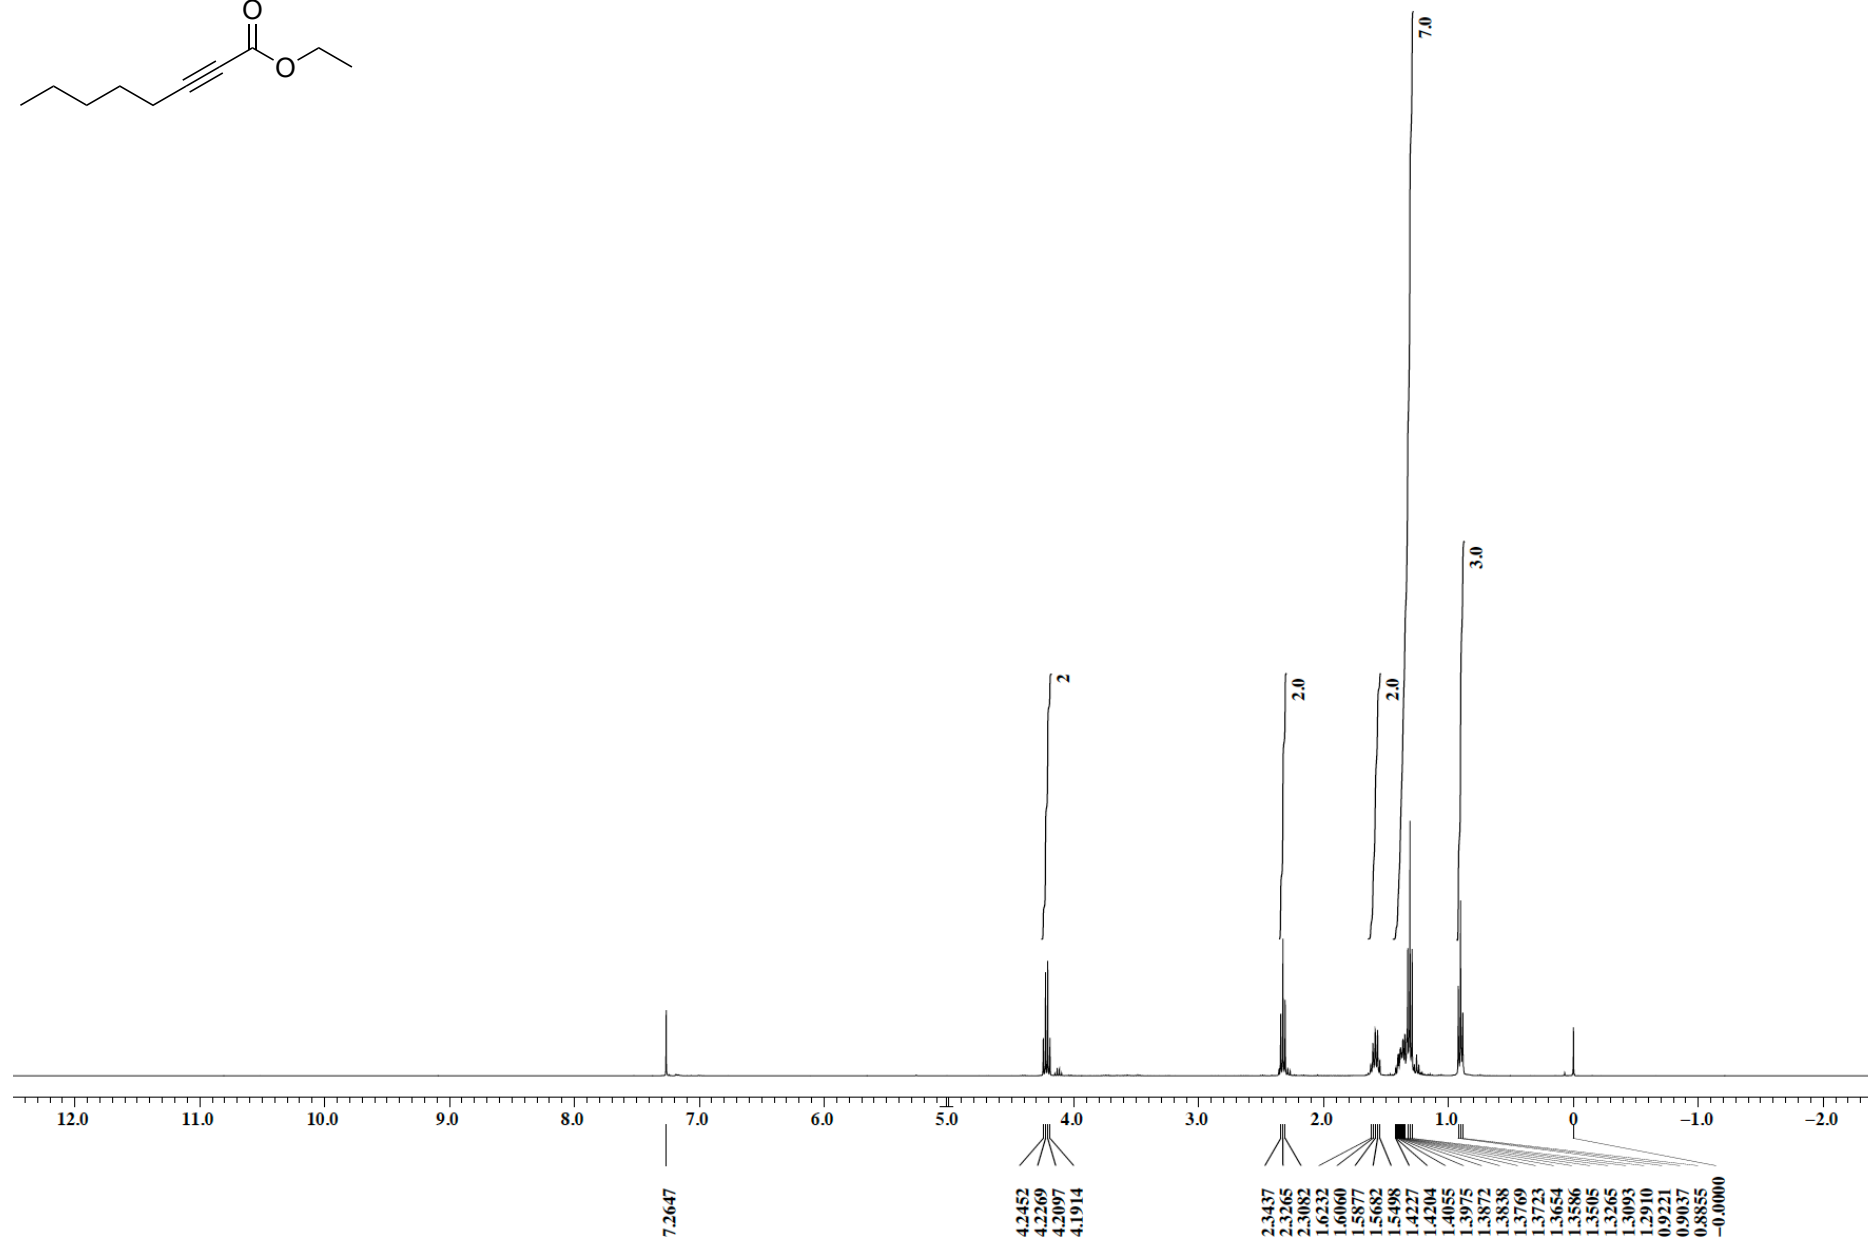

X : parts per Million :  $^1\text{H}$

**9qb**,  $^{13}\text{C}$  NMR ( $\text{CDCl}_3$ , 100 MHz)

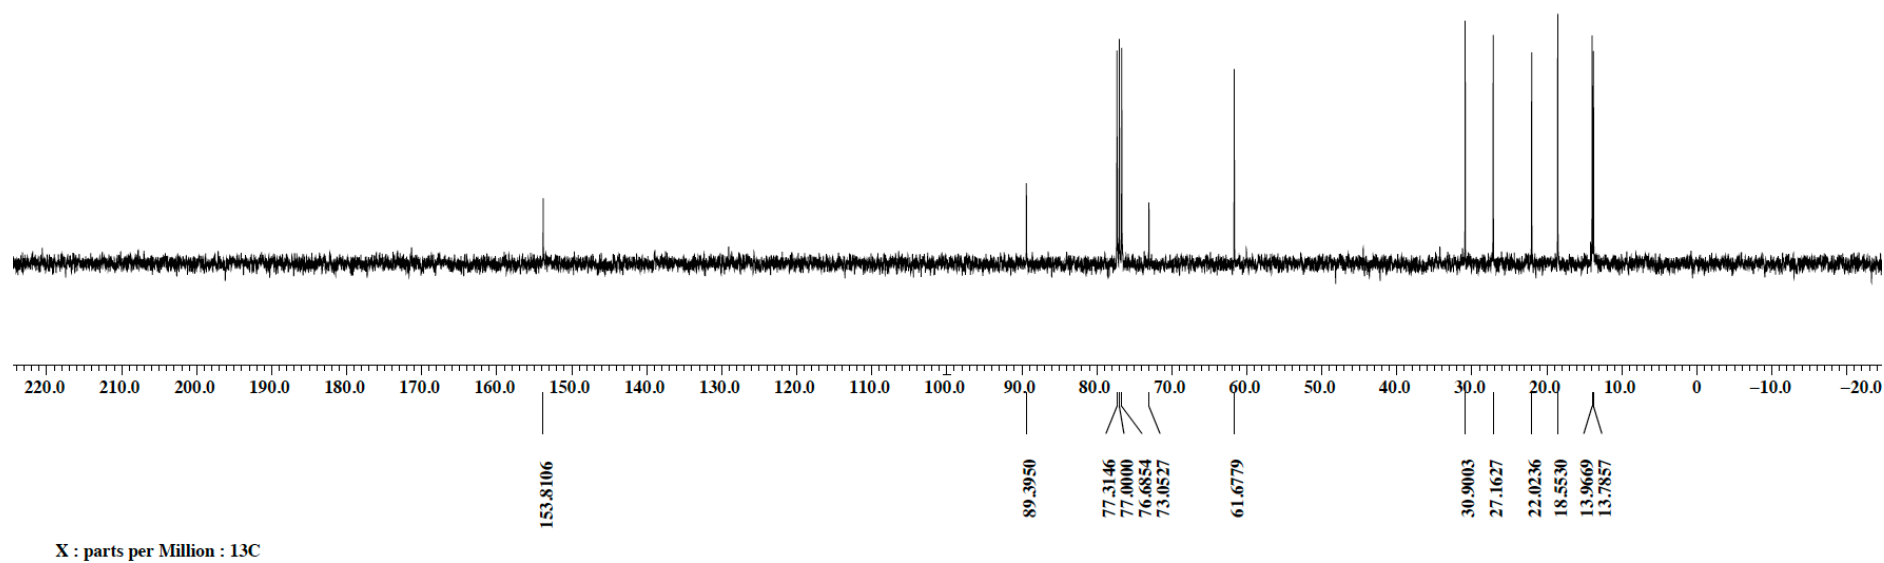



**9ra**,  $^1\text{H}$  NMR ( $\text{CDCl}_3$ , 400 MHz)

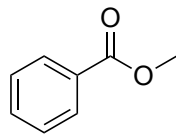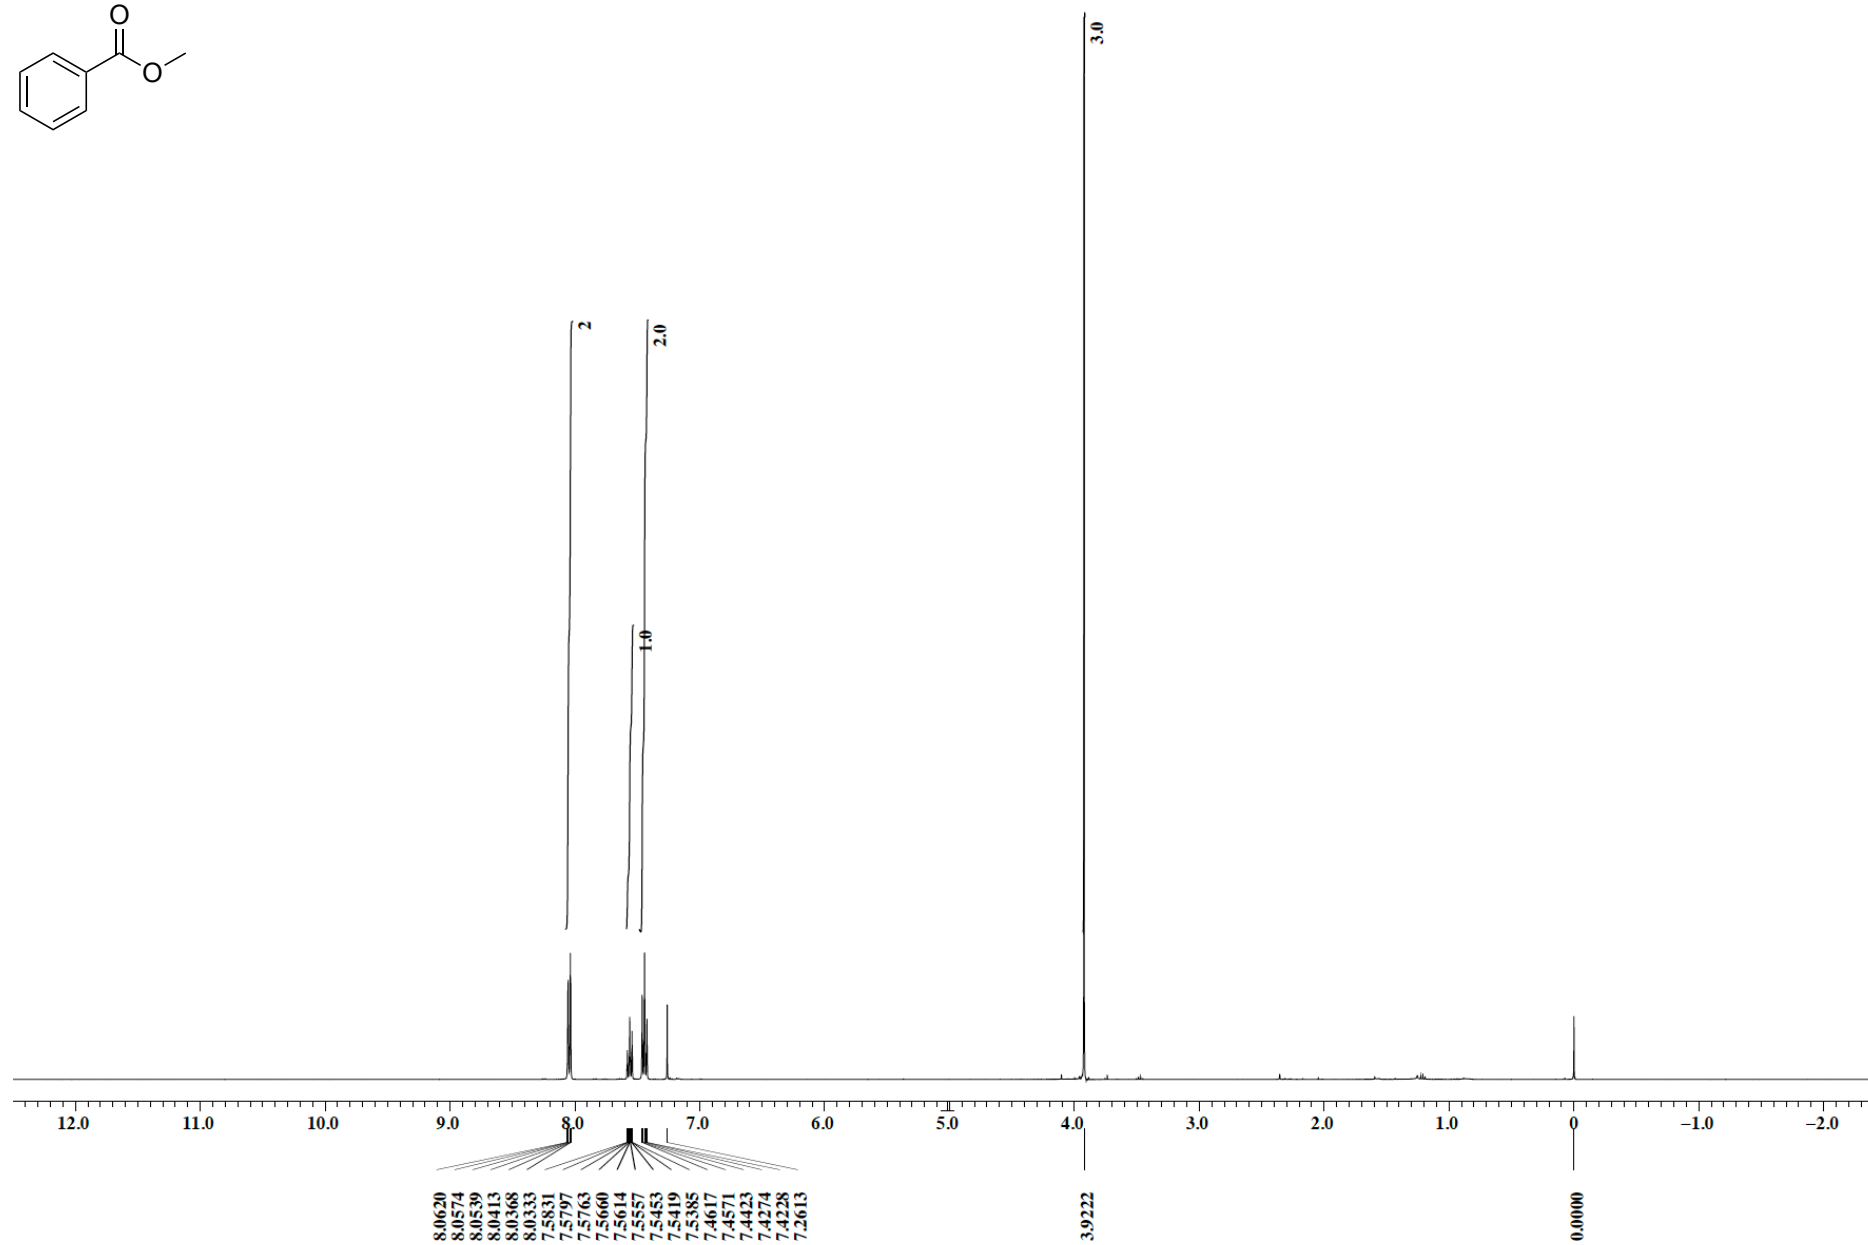

X : parts per Million :  $^1\text{H}$

**9ra**,  $^{13}\text{C}$  NMR ( $\text{CDCl}_3$ , 100 MHz)

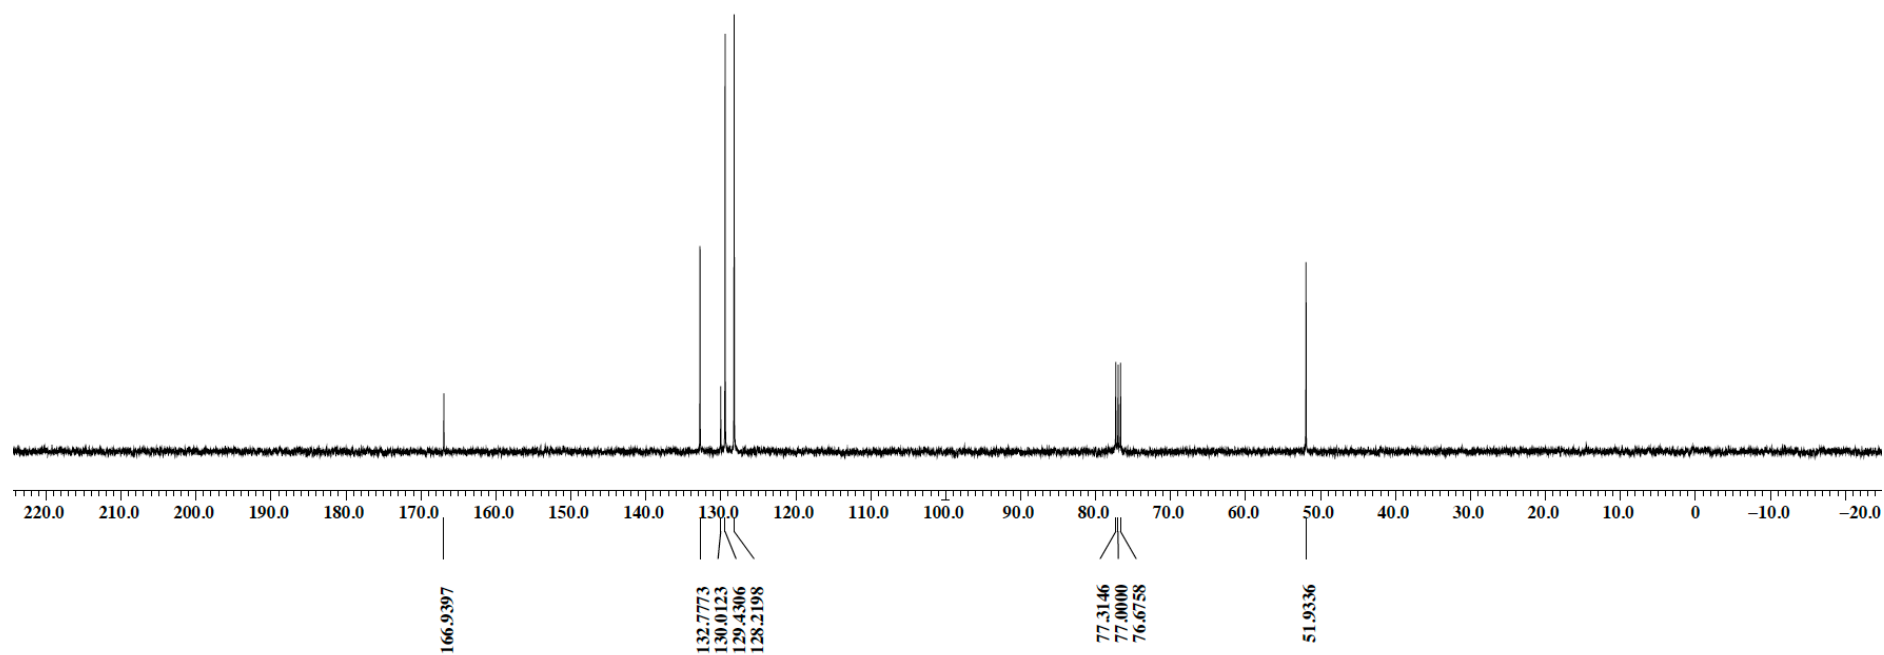

X : parts per Million :  $^{13}\text{C}$

**9sa**,  $^1\text{H}$  NMR ( $\text{CDCl}_3$ , 400 MHz)

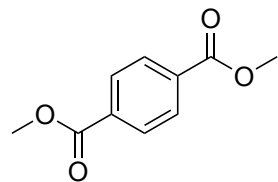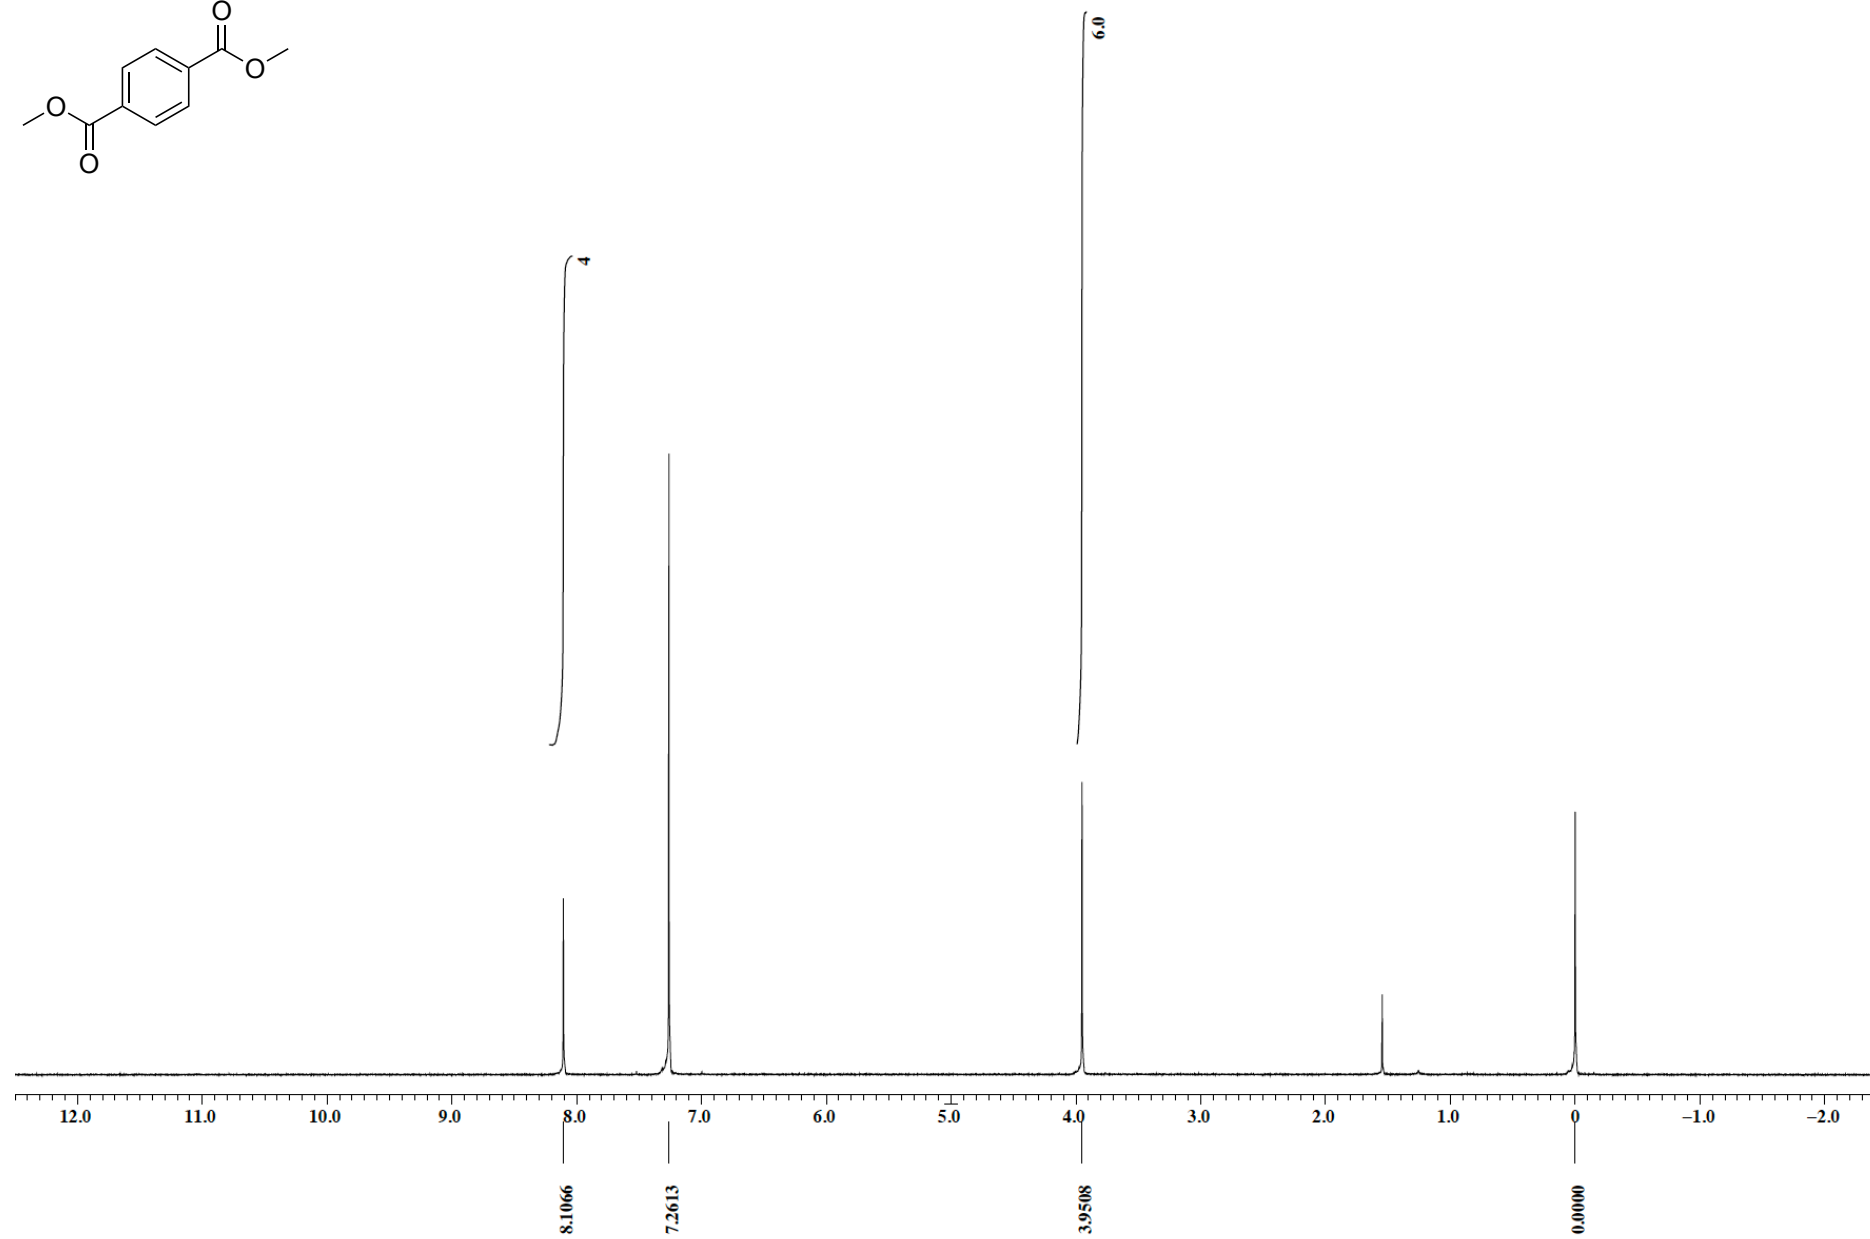

X : parts per Million :  $^1\text{H}$

**9sa**,  $^{13}\text{C}$  NMR ( $\text{CDCl}_3$ , 100 MHz)

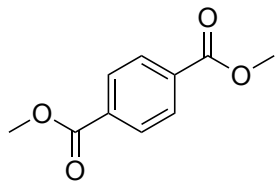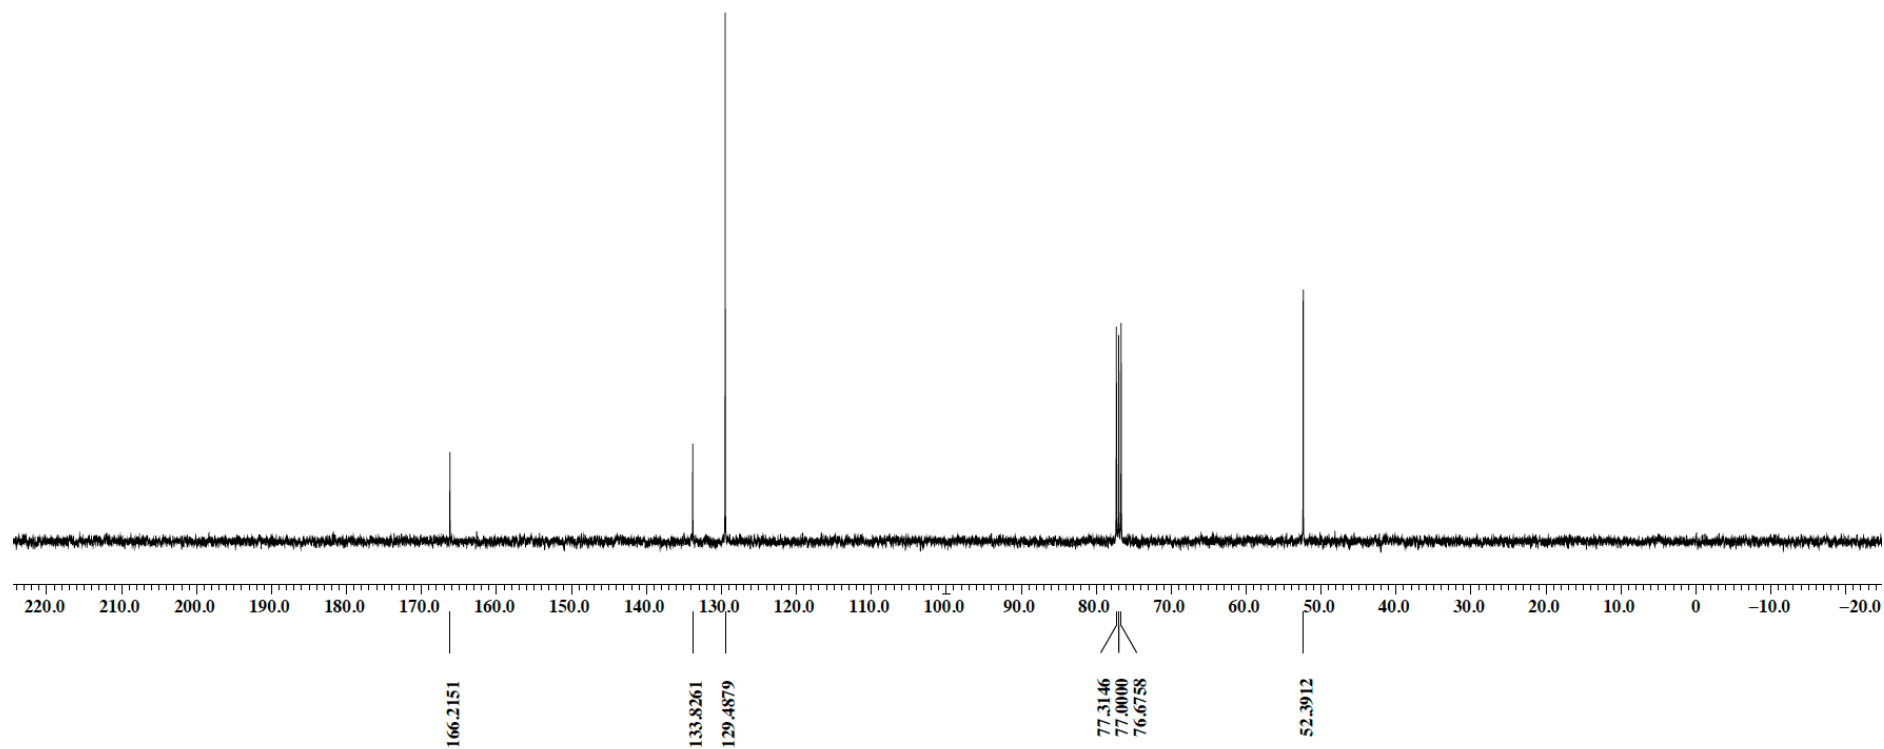

X : parts per Million :  $^{13}\text{C}$

**9ta**,  $^1\text{H}$  NMR ( $\text{CDCl}_3$ , 400 MHz)

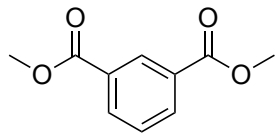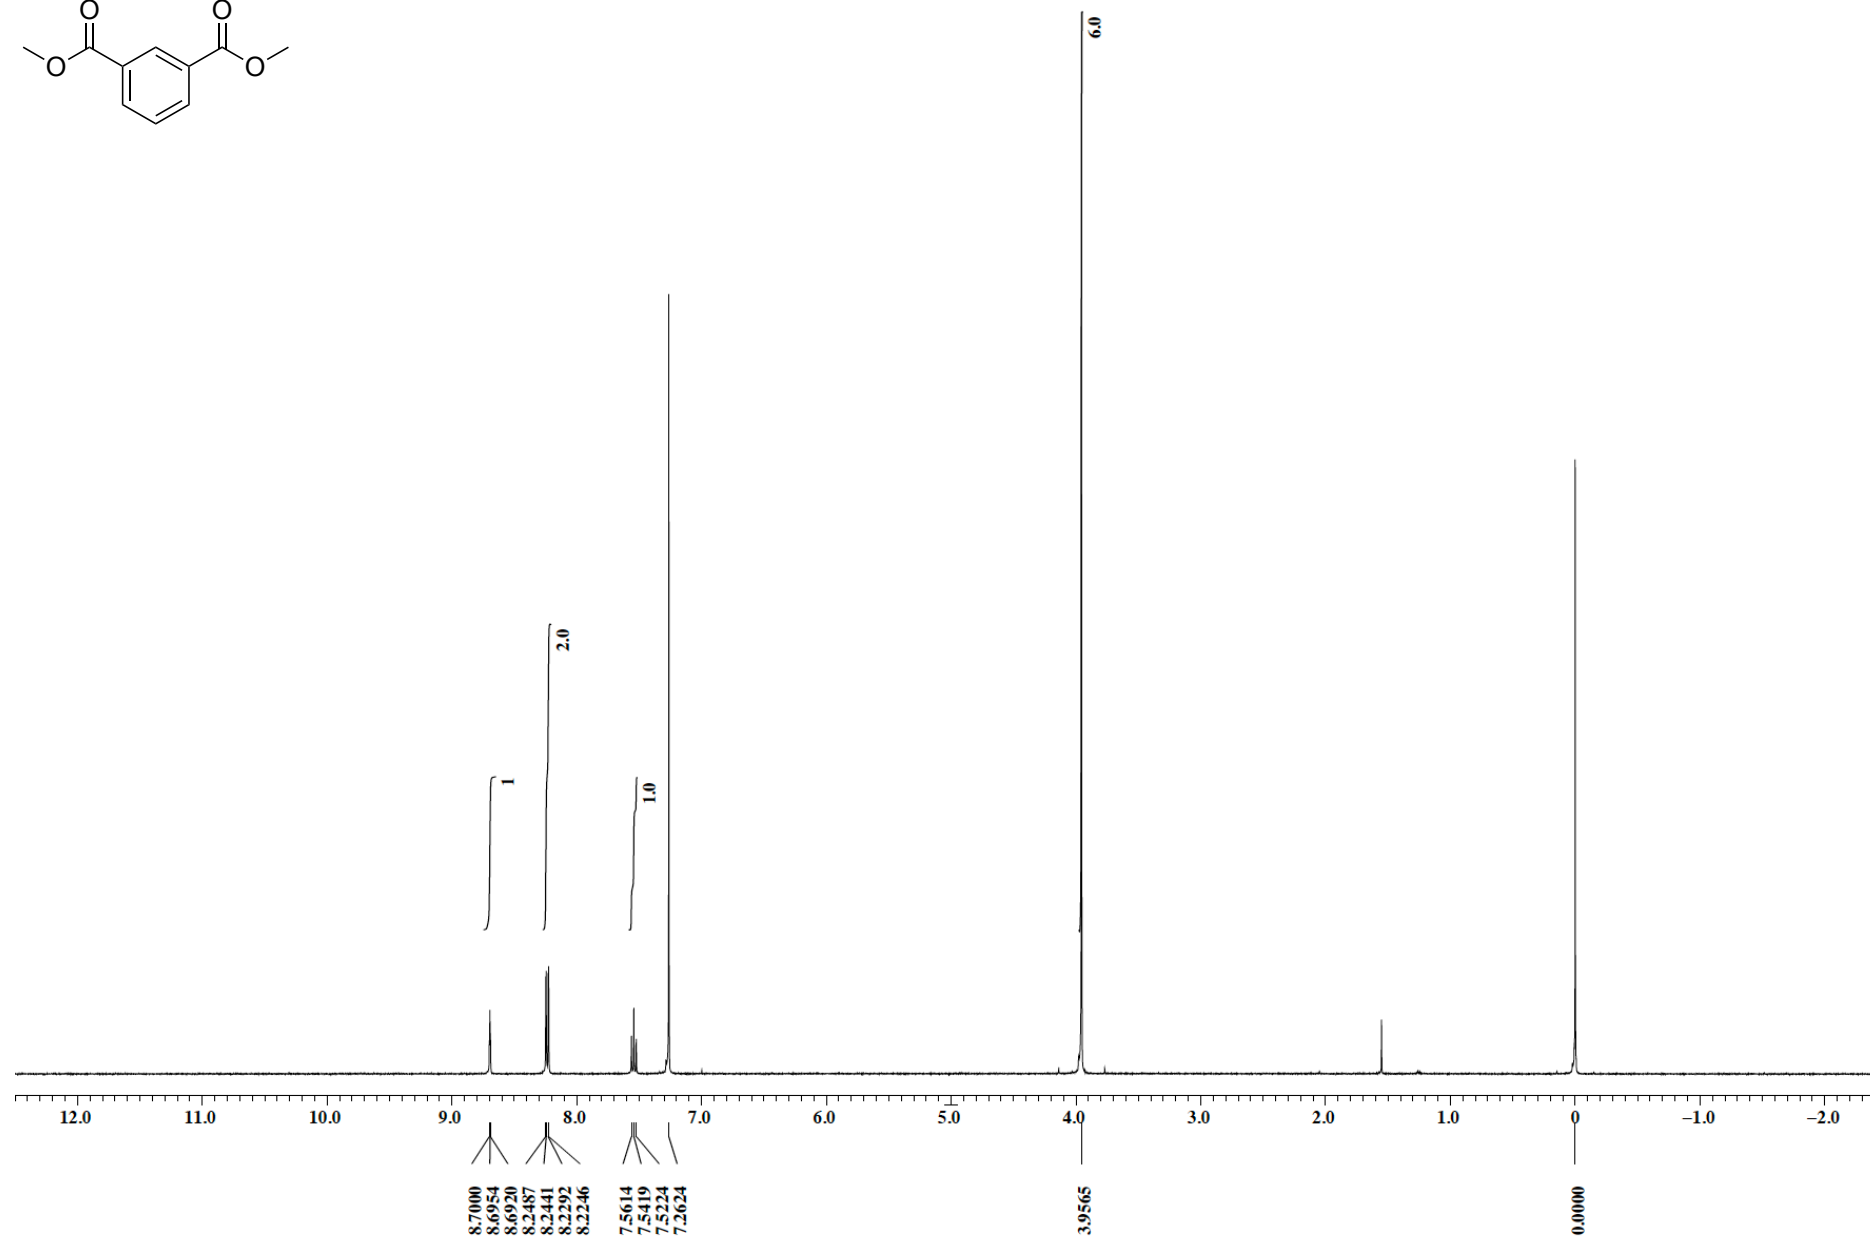

X : parts per Million :  $^1\text{H}$

**9ta**,  $^{13}\text{C}$  NMR ( $\text{CDCl}_3$ , 100 MHz)

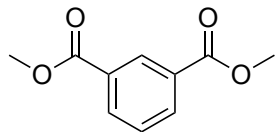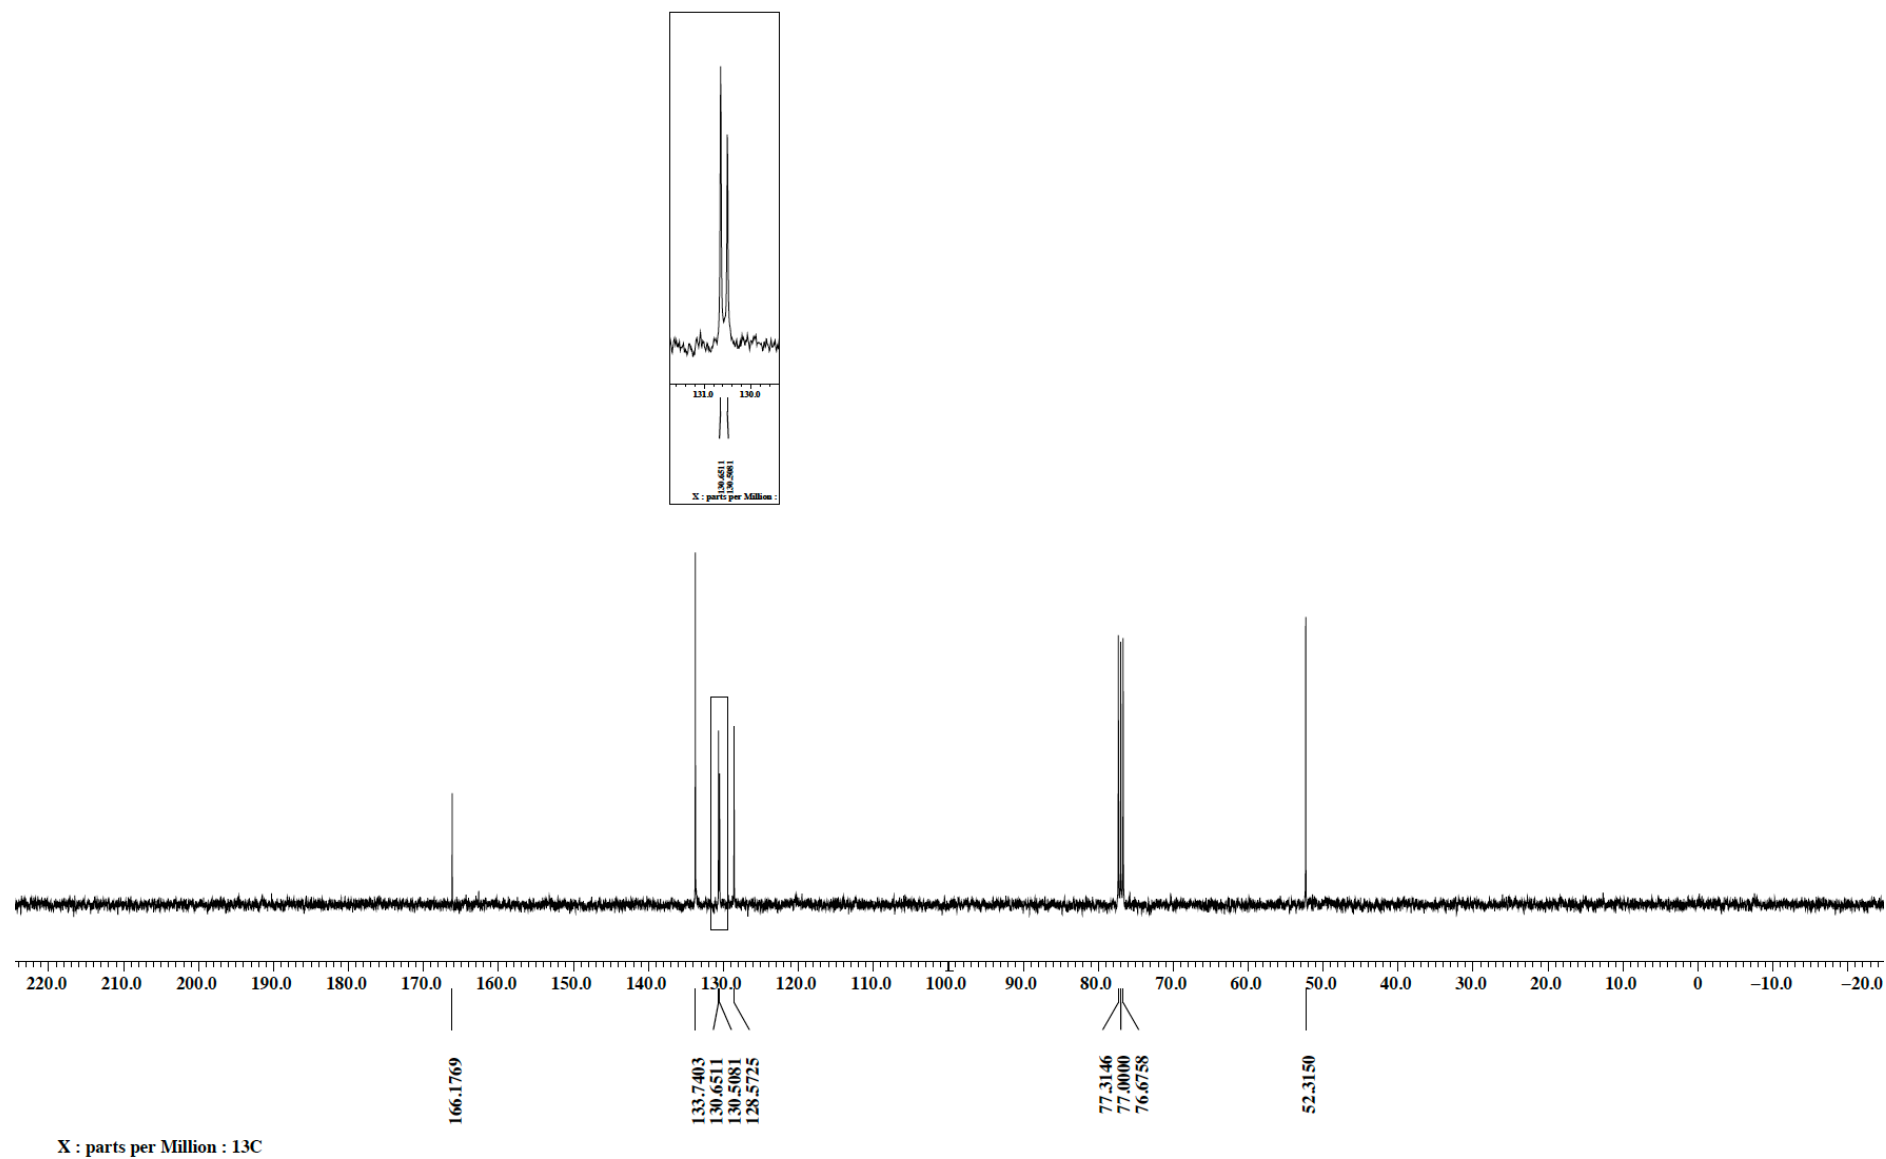

**9ua**,  $^1\text{H}$  NMR ( $\text{CDCl}_3$ , 400 MHz)

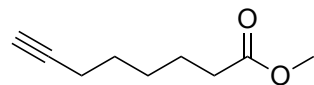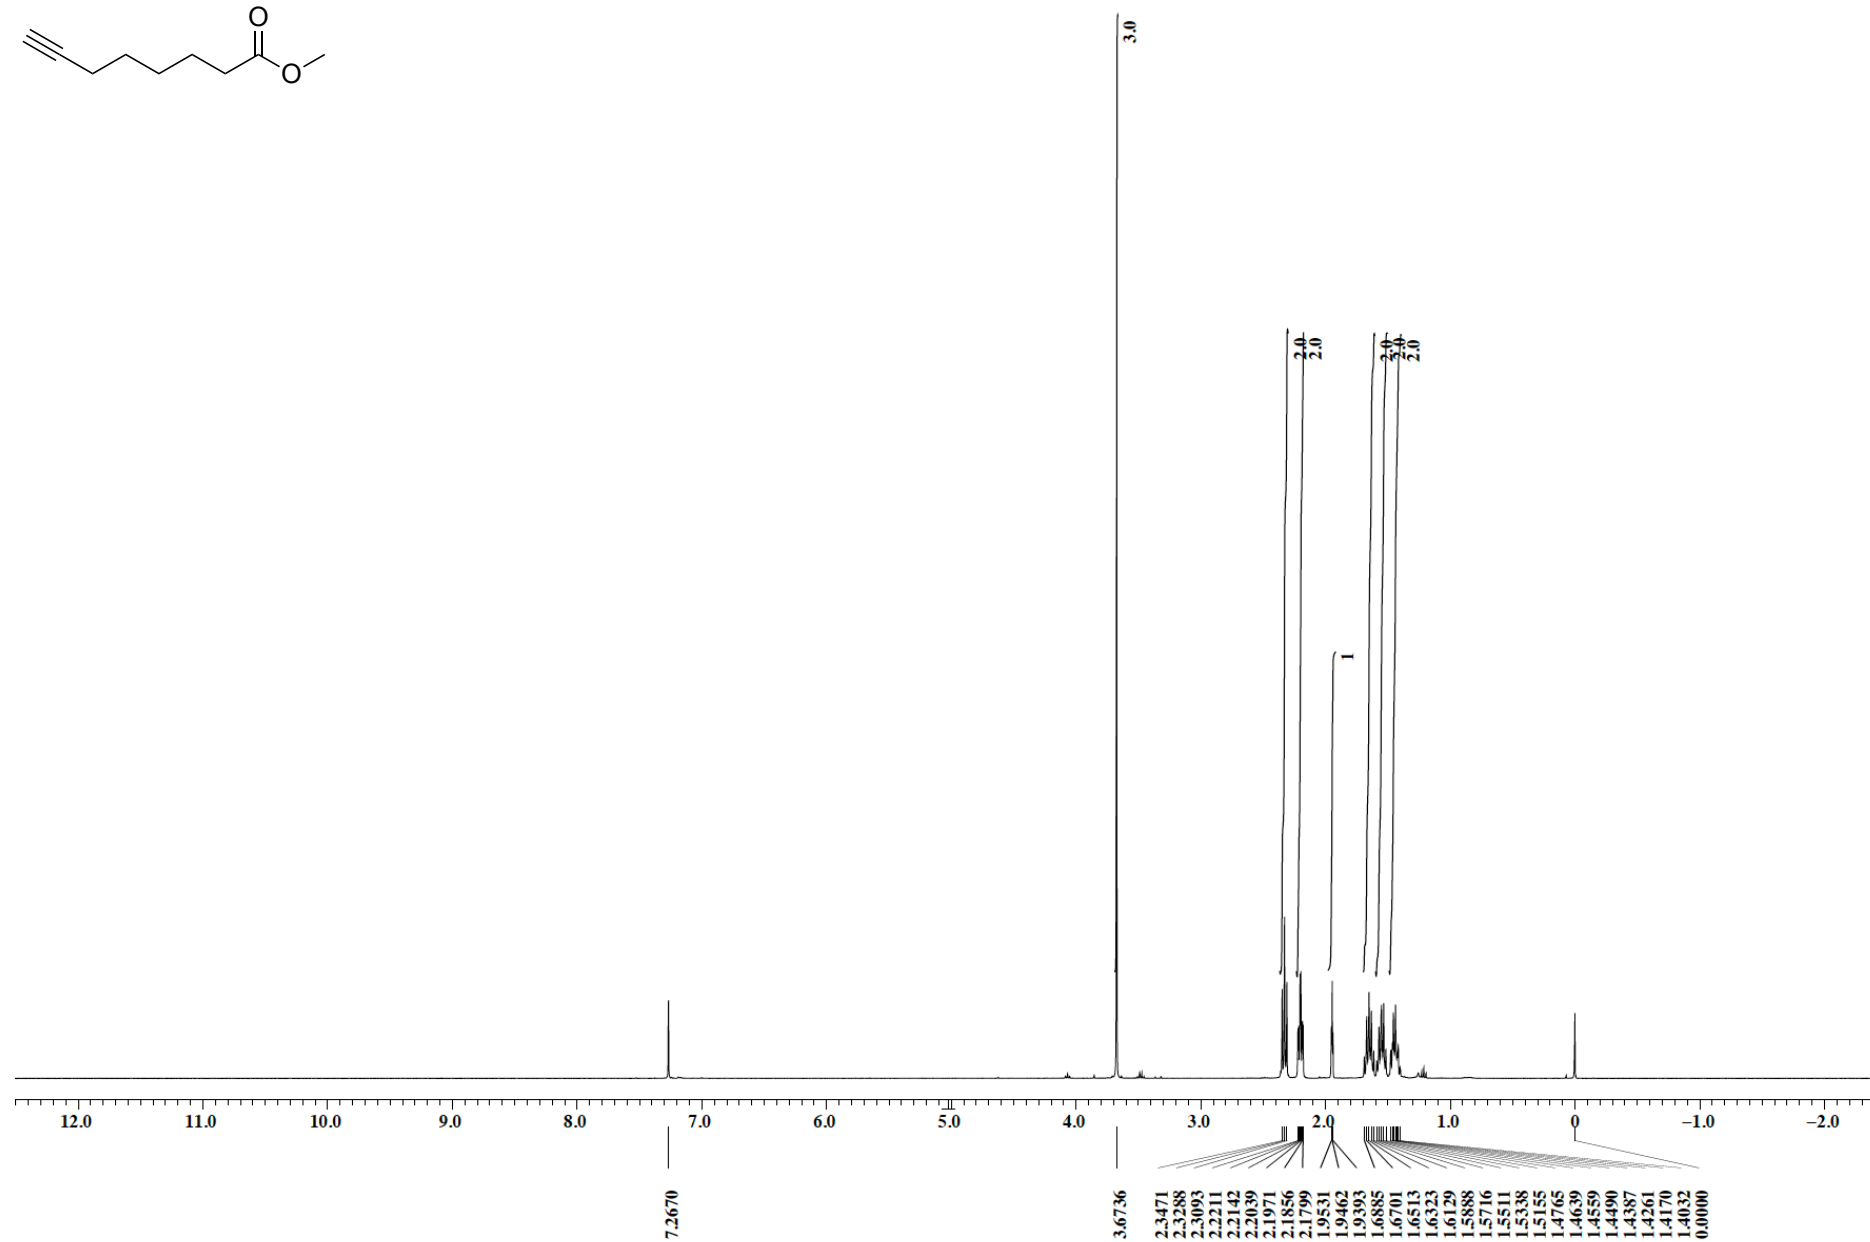

X : parts per Million :  $^1\text{H}$

**9ua**,  $^{13}\text{C}$  NMR ( $\text{CDCl}_3$ , 100 MHz)

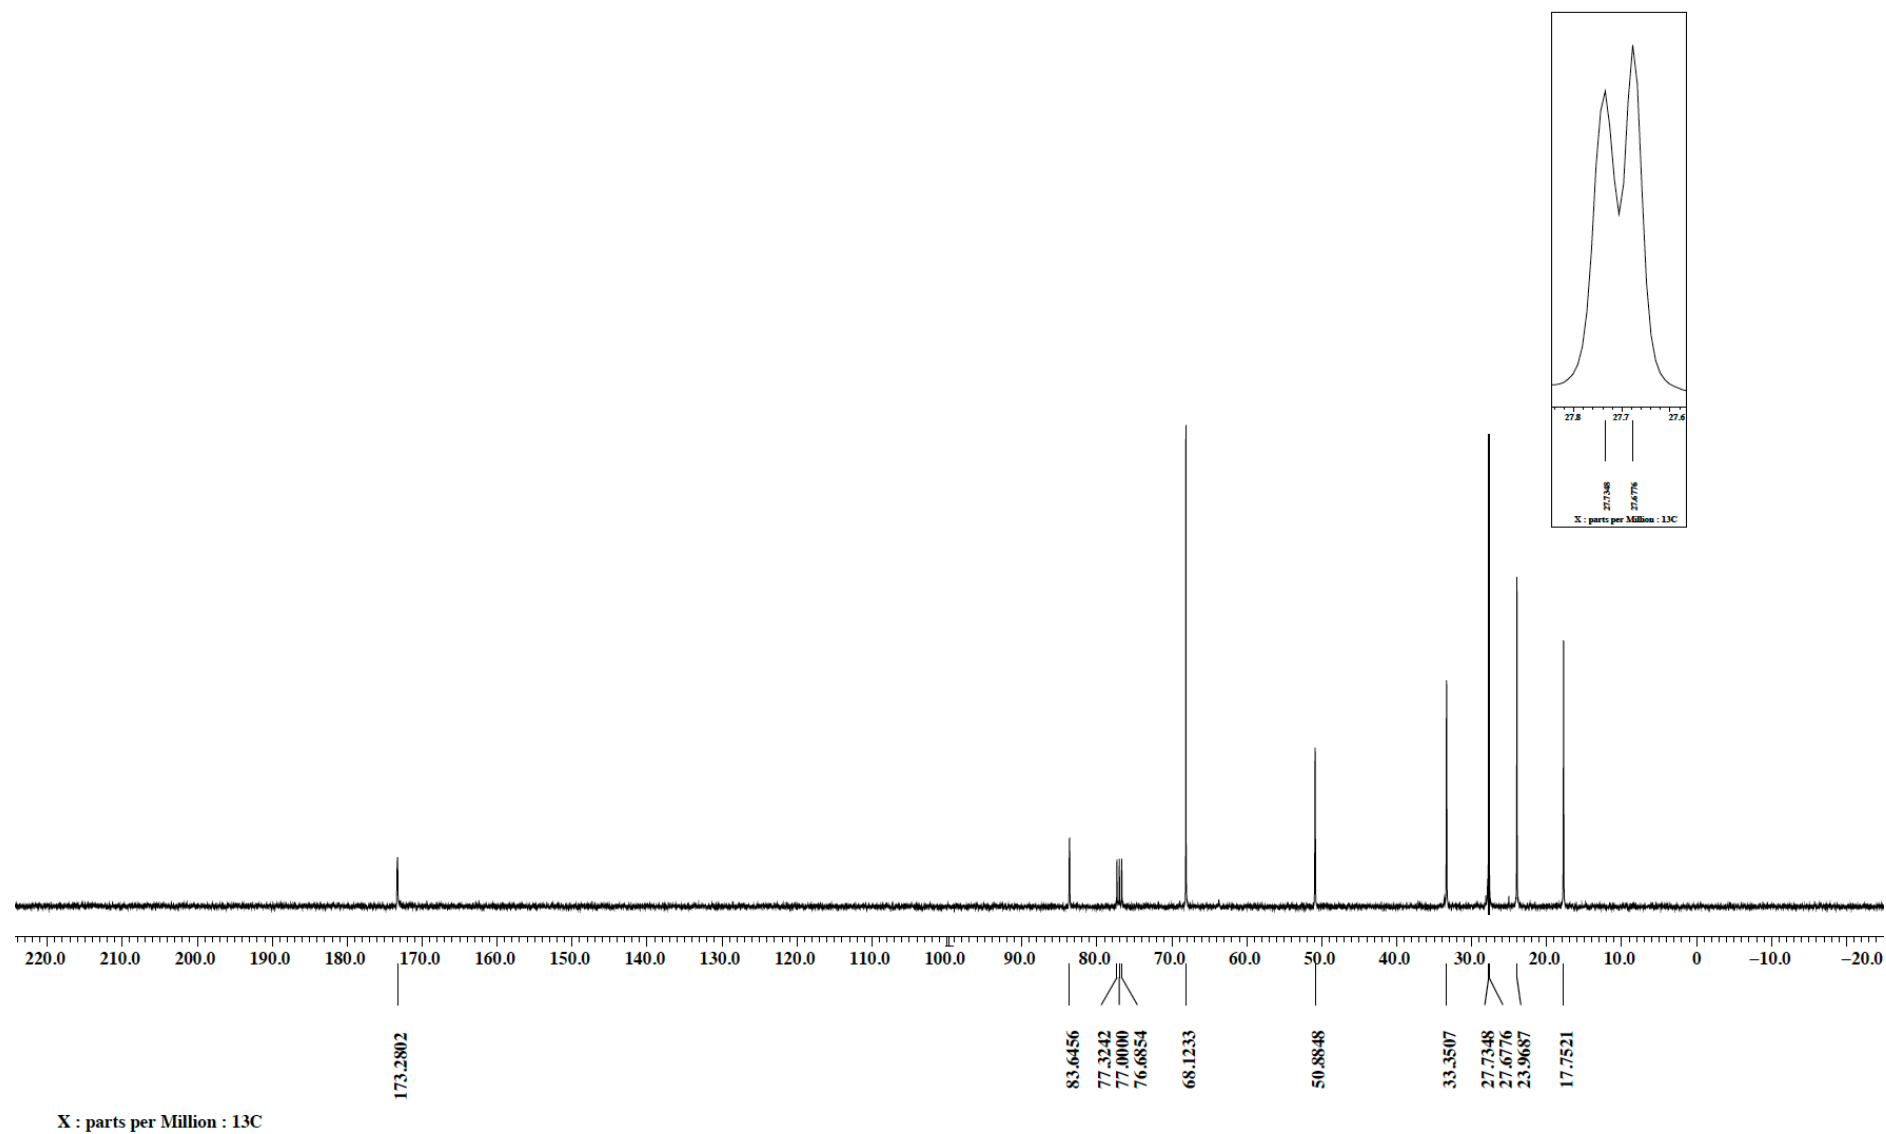

Supplement: d5gc01737h1.pdf [file d5gc01737h1.pdf]
